# Supplementary material
Source: publisher figshare collection journal article supplement (https://acs.figshare.com/ndownloader/files/20049485)

# Regioselectivity-Switchable Catalytic Annulations of Alkynyl $\alpha$ -Diketones and $\alpha$ -Cyanoketones

Sakkani Nagaraju,<sup>†</sup> Shuhua Liu,<sup>†</sup> Jinggong Liu,<sup>§</sup> Shuang Yang,<sup>‡</sup> Rui Liu,<sup>‡</sup> Zhizhou Chen,<sup>‡</sup> Banoth Paplal,<sup>†</sup> and Xinqiang Fang<sup>\*,‡</sup>

<sup>†</sup>Shandong Analysis and Test Center, Qilu University of Technology (Shandong Academy of Sciences), Jinan 250014, China

<sup>‡</sup>State Key Laboratory of Structural Chemistry, Center for Excellence in Molecular Synthesis, Fujian Institute of Research on the Structure of Matter, University of Chinese Academy of Sciences, Fuzhou 350100, China

<sup>§</sup>Orthopedics Department, Guangdong Provincial Hospital of Traditional Chinese Medicine, The Second Affiliated Hospital of Guangzhou University of Chinese Medicine, No. 111 Dade Road, Guangzhou 510120, China.

E-mail: [xqfang@fjirsm.ac.cn](mailto:xqfang@fjirsm.ac.cn)

## Table of Contents

|             |                                                                     |     |
|-------------|---------------------------------------------------------------------|-----|
| <b>I</b>    | General information                                                 | S1  |
| <b>II</b>   | X-ray crystallographic analysis                                     | S2  |
| <b>III</b>  | General procedures for the preparation of substrates                | S11 |
| <b>IV</b>   | Typical procedure of the synthesis of compounds <b>3</b>            | S12 |
| <b>V</b>    | Typical procedure of the synthesis of compounds <b>4</b>            | S12 |
| <b>VI</b>   | Typical procedure of the synthesis of compounds <b>5</b>            | S13 |
| <b>VII</b>  | Typical procedure of the synthesis of compounds <b>6a-6d</b>        | S13 |
| <b>VIII</b> | Typical procedure of the synthesis of compounds <b>6e-6g</b>        | S14 |
| <b>IX</b>   | Typical procedure of the synthesis of compounds <b>6h-6j</b>        | S14 |
| <b>X</b>    | Typical procedure of the synthesis of compounds <b>6k</b>           | S15 |
| <b>XI</b>   | Procedures for the derivatizations of products                      | S16 |
| <b>XII</b>  | Characterization of new compounds                                   | S18 |
| <b>XIII</b> | <sup>1</sup> H NMR and <sup>13</sup> C NMR spectra of new compounds | S43 |

## I. General Information

Commercially available chemicals were directly used without further purification, unless otherwise mentioned, all experiments and manipulations involving air- or moisture-sensitive compounds were performed using standard Schlenk technique. All solvents were purified and dried using typical procedures. Proton nuclear magnetic resonance (<sup>1</sup>H NMR) spectra were

recorded on a Bruker AVANCE III HD400 (400 MHz) and ECZ600S (600 MHz) spectrometer. Chemical shifts were recorded in parts per million (ppm,  $\delta$ ) relative to tetramethylsilane ( $\delta = 0.00$  ppm) or acetone-D<sub>6</sub> ( $\delta = 2.09$  ppm), chloroform ( $\delta = 7.26$  ppm) and dimethyl sulfoxide-D<sub>6</sub> ( $\delta = 2.50$  ppm). <sup>1</sup>H NMR splitting patterns are designated as singlet (s), doublet (d), triplet (t), quartet (q), dd (doublet of doublets); m (multiplet), and etc. All first-order splitting patterns were assigned on the basis of the appearance of the multiplet. Splitting patterns that could not be easily interpreted are designated as multiplet (m) or broad (br). Carbon nuclear magnetic resonance (<sup>13</sup>C NMR) spectra were recorded on a Bruker AVANCE III HD400 (400 MHz) (100 MHz) and ECZ600S (600 MHz) (150 MHz) spectrometers. High resolution mass spectral analysis (HRMS) was performed on Thermo Fisher Scientific LTQ FT Ultra mass spectrometer. The determination of *e.e.* was performed via chiral HPLC analysis using Shimadzu LC-20AD HPLC workstation. X-ray crystallography analysis was performed on Agilent Super Nova X-ray diffractionmeter. Optical rotations were measured using a 1 mL cell with a 5dm path length on an INESA SGW-1 polarimeter and are reported as follows:  $[\alpha]_D^{rt}$  (c in g per 100 mL solvent). Analytical thin-layer chromatography (TLC) was carried out on WFH-203 F254 pre-coated silica gel plate (0.2 mm thickness). Visualization was performed using a UV lamp or 2,4-Dinitrophenylhydrazine or potassium permanganate stain or phosphomolybdic acid.

## II. X-ray crystallographic analysis

Method for single crystals cultivation: a pure solid sample (10–20 mg) was dissolved in dichloromethane/acetone (2 mL) in a vial at room temperature, and petroleum ether/hexane (0.1 mL) was added into the above solution slowly while keeping the sample completely dissolved. The vial was properly sealed with parafilm and kept at room temperature to allow the slow evaporation of the solvents until a single crystal was obtained.

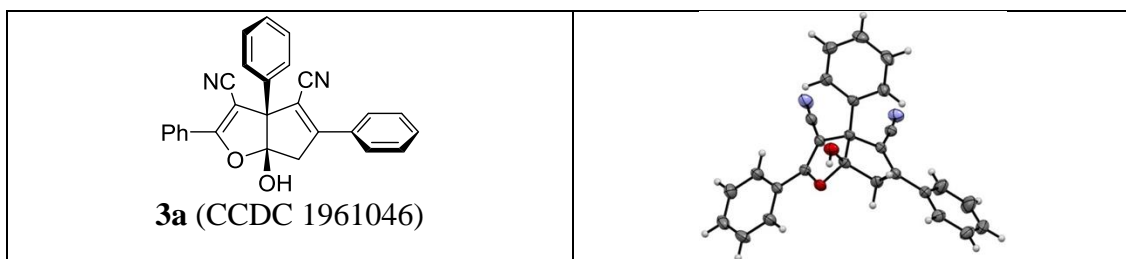

|                                                                                                                      |                                                                                      |
|----------------------------------------------------------------------------------------------------------------------|--------------------------------------------------------------------------------------|
| 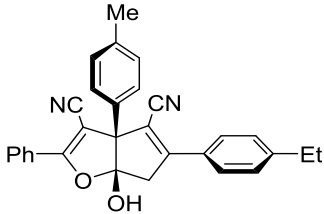 <p><b>3i</b> (CCDC 1961047)</p>    |    |
|  <p><b>4a</b> (CCDC 1961048)</p>    |    |
|  <p><b>4i</b> (CCDC 1961052)</p>   |   |
|  <p><b>5a</b> (CCDC 1961053)</p>  |  |
|  <p><b>3aa</b> (CCDC 1962410)</p> |  |

|                                                                                                                      |                                                                                      |
|----------------------------------------------------------------------------------------------------------------------|--------------------------------------------------------------------------------------|
| 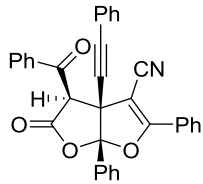 <p><b>4aa</b> (CCDC 1961055)</p>   |    |
|  <p><b>4ab</b> (CCDC 1961056)</p>   |    |
|  <p><b>4ac</b> (CCDC 1961057)</p>   |   |
|  <p><b>4ad</b> (CCDC 1961058)</p> |  |

**Table S1:** Crystal data and structure refinement for **3a**

|                                      |                                                  |
|--------------------------------------|--------------------------------------------------|
| Identification code                  | 3a                                               |
| Empirical formula                    | C <sub>28</sub> H <sub>19</sub> N <sub>2</sub> O |
| Formula weight                       | 402.46                                           |
| Temperature/K                        | 150.00(10)                                       |
| Crystal system                       | monoclinic                                       |
| Space group                          | P2 <sub>1</sub> /n                               |
| a/Å                                  | 9.72011(12)                                      |
| b/Å                                  | 16.17976(18)                                     |
| c/Å                                  | 12.95619(15)                                     |
| α/°                                  | 90                                               |
| β/°                                  | 90.8322(11)                                      |
| γ/°                                  | 90                                               |
| Volume/Å <sup>3</sup>                | 2037.39(4)                                       |
| Z                                    | 4                                                |
| ρ <sub>calc</sub> /g/cm <sup>3</sup> | 1.3120                                           |

|                                                |                                                               |
|------------------------------------------------|---------------------------------------------------------------|
| $\mu/\text{mm}^{-1}$                           | 0.666                                                         |
| F(000)                                         | 842.6                                                         |
| Crystal size/ $\text{mm}^3$                    | $0.1 \times 0.05 \times 0.05$                                 |
| Radiation                                      | Cu K $\alpha$ ( $\lambda = 1.54184$ )                         |
| 2 $\Theta$ range for data collection/ $^\circ$ | 8.74 to 148.6                                                 |
| Index ranges                                   | $-11 \leq h \leq 12, -17 \leq k \leq 20, -15 \leq l \leq 16$  |
| Reflections collected                          | 24339                                                         |
| Independent reflections                        | 4075 [ $R_{\text{int}} = 0.0451, R_{\text{sigma}} = 0.0238$ ] |
| Data/restraints/parameters                     | 4075/0/280                                                    |
| Goodness-of-fit on $F^2$                       | 1.046                                                         |
| Final R indexes [ $I \geq 2\sigma(I)$ ]        | $R_1 = 0.0432, wR_2 = 0.1105$                                 |
| Final R indexes [all data]                     | $R_1 = 0.0453, wR_2 = 0.1121$                                 |
| Largest diff. peak/hole / $e \text{ \AA}^{-3}$ | 0.49/-0.24                                                    |

**Table S2:** Crystal data and structure refinement for **3i**

|                                                |                                                               |
|------------------------------------------------|---------------------------------------------------------------|
| Identification code                            | 3i                                                            |
| Empirical formula                              | $\text{C}_{30}\text{H}_{19}\text{N}_2\text{O}_2$              |
| Formula weight                                 | 444.54                                                        |
| Temperature/K                                  | 291.86(10)                                                    |
| Crystal system                                 | monoclinic                                                    |
| Space group                                    | $P2_1/n$                                                      |
| $a/\text{\AA}$                                 | 10.6094(3)                                                    |
| $b/\text{\AA}$                                 | 18.1146(6)                                                    |
| $c/\text{\AA}$                                 | 12.8174(3)                                                    |
| $\alpha/^\circ$                                | 90                                                            |
| $\beta/^\circ$                                 | 95.312(2)                                                     |
| $\gamma/^\circ$                                | 90                                                            |
| Volume/ $\text{\AA}^3$                         | 2452.74(12)                                                   |
| Z                                              | 4                                                             |
| $\rho_{\text{calc}}/\text{g/cm}^3$             | 1.2037                                                        |
| $\mu/\text{mm}^{-1}$                           | 0.598                                                         |
| F(000)                                         | 938.8                                                         |
| Crystal size/ $\text{mm}^3$                    | $0.06 \times 0.05 \times 0.05$                                |
| Radiation                                      | Cu K $\alpha$ ( $\lambda = 1.54184$ )                         |
| 2 $\Theta$ range for data collection/ $^\circ$ | 8.48 to 149.32                                                |
| Index ranges                                   | $-13 \leq h \leq 12, -22 \leq k \leq 21, -15 \leq l \leq 15$  |
| Reflections collected                          | 14194                                                         |
| Independent reflections                        | 4820 [ $R_{\text{int}} = 0.0250, R_{\text{sigma}} = 0.0308$ ] |
| Data/restraints/parameters                     | 4820/1/328                                                    |
| Goodness-of-fit on $F^2$                       | 1.046                                                         |
| Final R indexes [ $I \geq 2\sigma(I)$ ]        | $R_1 = 0.0619, wR_2 = 0.2013$                                 |
| Final R indexes [all data]                     | $R_1 = 0.0848, wR_2 = 0.2250$                                 |
| Largest diff. peak/hole / $e \text{ \AA}^{-3}$ | 0.26/-0.16                                                    |

**Table S3:** Crystal data and structure refinement for **4a**

|                                             |                                                               |
|---------------------------------------------|---------------------------------------------------------------|
| Identification code                         | 4a                                                            |
| Empirical formula                           | C <sub>34</sub> H <sub>22</sub> N <sub>2</sub> O <sub>3</sub> |
| Formula weight                              | 506.57                                                        |
| Temperature/K                               | 150.00(10)                                                    |
| Crystal system                              | monoclinic                                                    |
| Space group                                 | P2 <sub>1</sub> /c                                            |
| a/Å                                         | 8.85928(10)                                                   |
| b/Å                                         | 24.8961(3)                                                    |
| c/Å                                         | 11.99933(13)                                                  |
| α/°                                         | 90                                                            |
| β/°                                         | 95.2548(10)                                                   |
| γ/°                                         | 90                                                            |
| Volume/Å <sup>3</sup>                       | 2635.47(5)                                                    |
| Z                                           | 4                                                             |
| ρ <sub>calc</sub> /g/cm <sup>3</sup>        | 1.2766                                                        |
| μ/mm <sup>-1</sup>                          | 0.657                                                         |
| F(000)                                      | 1059.3                                                        |
| Crystal size/mm <sup>3</sup>                | 0.03 × 0.02 × 0.02                                            |
| Radiation                                   | Cu Kα (λ = 1.54184)                                           |
| 2θ range for data collection/°              | 7.1 to 148.4                                                  |
| Index ranges                                | -10 ≤ h ≤ 10, -29 ≤ k ≤ 30, -14 ≤ l ≤ 8                       |
| Reflections collected                       | 16547                                                         |
| Independent reflections                     | 5207 [R <sub>int</sub> = 0.0313, R <sub>sigma</sub> = 0.0298] |
| Data/restraints/parameters                  | 5207/1/352                                                    |
| Goodness-of-fit on F <sup>2</sup>           | 1.025                                                         |
| Final R indexes [I ≥ 2σ (I)]                | R <sub>1</sub> = 0.0404, wR <sub>2</sub> = 0.1025             |
| Final R indexes [all data]                  | R <sub>1</sub> = 0.0462, wR <sub>2</sub> = 0.1063             |
| Largest diff. peak/hole / e Å <sup>-3</sup> | 0.31/-0.32                                                    |

**Table S4:** Crystal data and structure refinement for **4i**

|                       |                                                               |
|-----------------------|---------------------------------------------------------------|
| Identification code   | F3                                                            |
| Empirical formula     | C <sub>37</sub> H <sub>28</sub> N <sub>2</sub> O <sub>3</sub> |
| Formula weight        | 548.65                                                        |
| Temperature/K         | 180.00(10)                                                    |
| Crystal system        | monoclinic                                                    |
| Space group           | P2 <sub>1</sub> /c                                            |
| a/Å                   | 8.96653(10)                                                   |
| b/Å                   | 27.5380(3)                                                    |
| c/Å                   | 12.02475(12)                                                  |
| α/°                   | 90                                                            |
| β/°                   | 93.3639(10)                                                   |
| γ/°                   | 90                                                            |
| Volume/Å <sup>3</sup> | 2964.04(6)                                                    |

|                                                |                                                               |
|------------------------------------------------|---------------------------------------------------------------|
| Z                                              | 4                                                             |
| $\rho_{\text{calc}}/\text{g}/\text{cm}^3$      | 1.2294                                                        |
| $\mu/\text{mm}^{-1}$                           | 0.621                                                         |
| F(000)                                         | 1155.6                                                        |
| Crystal size/ $\text{mm}^3$                    | $0.1 \times 0.06 \times 0.05$                                 |
| Radiation                                      | Cu K $\alpha$ ( $\lambda = 1.54184$ )                         |
| 2 $\Theta$ range for data collection/ $^\circ$ | 6.42 to 148.46                                                |
| Index ranges                                   | $-8 \leq h \leq 11, -32 \leq k \leq 33, -14 \leq l \leq 14$   |
| Reflections collected                          | 17378                                                         |
| Independent reflections                        | 5857 [ $R_{\text{int}} = 0.0278, R_{\text{sigma}} = 0.0278$ ] |
| Data/restraints/parameters                     | 5857/0/381                                                    |
| Goodness-of-fit on $F^2$                       | 1.029                                                         |
| Final R indexes [ $I \geq 2\sigma(I)$ ]        | $R_1 = 0.0470, wR_2 = 0.1266$                                 |
| Final R indexes [all data]                     | $R_1 = 0.0524, wR_2 = 0.1342$                                 |
| Largest diff. peak/hole / $e \text{ \AA}^{-3}$ | 0.45/-0.43                                                    |

**Table S5:** Crystal data and structure refinement for **5a**

|                                                |                                                               |
|------------------------------------------------|---------------------------------------------------------------|
| Identification code                            | 5a                                                            |
| Empirical formula                              | $\text{C}_{25}\text{NO}_3\text{H}_{0.13}$                     |
| Formula weight                                 | 377.40                                                        |
| Temperature/K                                  | 149.99(10)                                                    |
| Crystal system                                 | orthorhombic                                                  |
| Space group                                    | Pbca                                                          |
| a/ $\text{\AA}$                                | 9.75613(13)                                                   |
| b/ $\text{\AA}$                                | 9.51207(13)                                                   |
| c/ $\text{\AA}$                                | 40.8263(6)                                                    |
| $\alpha/^\circ$                                | 90                                                            |
| $\beta/^\circ$                                 | 90                                                            |
| $\gamma/^\circ$                                | 90                                                            |
| Volume/ $\text{\AA}^3$                         | 3788.73(9)                                                    |
| Z                                              | 8                                                             |
| $\rho_{\text{calc}}/\text{g}/\text{cm}^3$      | 1.3232                                                        |
| $\mu/\text{mm}^{-1}$                           | 0.706                                                         |
| F(000)                                         | 1573.1                                                        |
| Crystal size/ $\text{mm}^3$                    | $0.1 \times 0.04 \times 0.02$                                 |
| Radiation                                      | Cu K $\alpha$ ( $\lambda = 1.54184$ )                         |
| 2 $\Theta$ range for data collection/ $^\circ$ | 8.66 to 148.42                                                |
| Index ranges                                   | $-9 \leq h \leq 12, -7 \leq k \leq 11, -49 \leq l \leq 49$    |
| Reflections collected                          | 12081                                                         |
| Independent reflections                        | 3744 [ $R_{\text{int}} = 0.0283, R_{\text{sigma}} = 0.0314$ ] |
| Data/restraints/parameters                     | 3744/0/261                                                    |
| Goodness-of-fit on $F^2$                       | 1.023                                                         |
| Final R indexes [ $I \geq 2\sigma(I)$ ]        | $R_1 = 0.0414, wR_2 = 0.1089$                                 |
| Final R indexes [all data]                     | $R_1 = 0.0467, wR_2 = 0.1129$                                 |
| Largest diff. peak/hole / $e \text{ \AA}^{-3}$ | 0.17/-0.27                                                    |

**Table S6:** Crystal data and structure refinement for **3aa**

|                                             |                                                               |
|---------------------------------------------|---------------------------------------------------------------|
| Identification code                         | 29-09-19                                                      |
| Empirical formula                           | C <sub>27</sub> H <sub>16</sub> N <sub>2</sub> O <sub>2</sub> |
| Formula weight                              | 400.42                                                        |
| Temperature/K                               | 294.12(10)                                                    |
| Crystal system                              | triclinic                                                     |
| Space group                                 | P-1                                                           |
| a/Å                                         | 10.5132(3)                                                    |
| b/Å                                         | 12.0199(3)                                                    |
| c/Å                                         | 12.1585(3)                                                    |
| α/°                                         | 67.192(3)                                                     |
| β/°                                         | 66.023(3)                                                     |
| γ/°                                         | 88.369(2)                                                     |
| Volume/Å <sup>3</sup>                       | 1278.80(6)                                                    |
| Z                                           | 2                                                             |
| ρ <sub>calc</sub> /g/cm <sup>3</sup>        | 1.040                                                         |
| μ/mm <sup>-1</sup>                          | 0.530                                                         |
| F(000)                                      | 416.0                                                         |
| Crystal size/mm <sup>3</sup>                | 0.05 × 0.05 × 0.03                                            |
| Radiation                                   | Cu Kα (λ = 1.54184)                                           |
| 2Θ range for data collection/°              | 8.074 to 148.16                                               |
| Index ranges                                | -13 ≤ h ≤ 12, -12 ≤ k ≤ 14, -15 ≤ l ≤ 14                      |
| Reflections collected                       | 13002                                                         |
| Independent reflections                     | 5002 [R <sub>int</sub> = 0.0281, R <sub>sigma</sub> = 0.0303] |
| Data/restraints/parameters                  | 5002/0/281                                                    |
| Goodness-of-fit on F <sup>2</sup>           | 1.058                                                         |
| Final R indexes [I >= 2σ (I)]               | R <sub>1</sub> = 0.0447, wR <sub>2</sub> = 0.1378             |
| Final R indexes [all data]                  | R <sub>1</sub> = 0.0502, wR <sub>2</sub> = 0.1434             |
| Largest diff. peak/hole / e Å <sup>-3</sup> | 0.19/-0.19                                                    |

**Table S7:** Crystal data and structure refinement for **4aa**

|                     |                                                 |
|---------------------|-------------------------------------------------|
| Identification code | 17-08-19                                        |
| Empirical formula   | C <sub>34</sub> H <sub>21</sub> NO <sub>4</sub> |
| Formula weight      | 507.55                                          |
| Temperature/K       | 150.00(10)                                      |
| Crystal system      | monoclinic                                      |
| Space group         | P2 <sub>1</sub> /c                              |
| a/Å                 | 10.5919(2)                                      |
| b/Å                 | 8.32758(18)                                     |
| c/Å                 | 29.5069(6)                                      |
| α/°                 | 90                                              |
| β/°                 | 96.5718(18)                                     |



|                                                |                                                                   |
|------------------------------------------------|-------------------------------------------------------------------|
| $\gamma/^\circ$                                | 90                                                                |
| Volume/ $\text{\AA}^3$                         | 2585.56(9)                                                        |
| Z                                              | 4                                                                 |
| $\rho_{\text{calc}}/\text{g/cm}^3$             | 1.3038                                                            |
| $\mu/\text{mm}^{-1}$                           | 0.690                                                             |
| F(000)                                         | 1059.4                                                            |
| Crystal size/ $\text{mm}^3$                    | $0.05 \times 0.05 \times 0.05$                                    |
| Radiation                                      | Cu K $\alpha$ ( $\lambda = 1.54184$ )                             |
| 2 $\Theta$ range for data collection/ $^\circ$ | 6.04 to 147.98                                                    |
| Index ranges                                   | $-13 \leq h \leq 13$ , $-5 \leq k \leq 10$ , $-36 \leq l \leq 36$ |
| Reflections collected                          | 13977                                                             |
| Independent reflections                        | 5115 [ $R_{\text{int}} = 0.0288$ , $R_{\text{sigma}} = 0.0309$ ]  |
| Data/restraints/parameters                     | 5115/0/351                                                        |
| Goodness-of-fit on $F^2$                       | 1.043                                                             |
| Final R indexes [ $I \geq 2\sigma(I)$ ]        | $R_1 = 0.0418$ , $wR_2 = 0.1070$                                  |
| Final R indexes [all data]                     | $R_1 = 0.0464$ , $wR_2 = 0.1104$                                  |
| Largest diff. peak/hole / $e \text{ \AA}^{-3}$ | 0.54/-0.46                                                        |

**Table S8:** Crystal data and structure refinement for **4ab**

|                                                |                                                                  |
|------------------------------------------------|------------------------------------------------------------------|
| Identification code                            | 28-08-19                                                         |
| Empirical formula                              | $\text{C}_{31}\text{H}_{19.41}\text{N}_2\text{O}_3$              |
| Formula weight                                 | 506.57                                                           |
| Temperature/K                                  | 296(6)                                                           |
| Crystal system                                 | triclinic                                                        |
| Space group                                    | P-1                                                              |
| $a/\text{\AA}$                                 | 8.05071(12)                                                      |
| $b/\text{\AA}$                                 | 11.75708(19)                                                     |
| $c/\text{\AA}$                                 | 16.5493(3)                                                       |
| $\alpha/^\circ$                                | 95.7815(14)                                                      |
| $\beta/^\circ$                                 | 96.8159(14)                                                      |
| $\gamma/^\circ$                                | 107.5854(14)                                                     |
| Volume/ $\text{\AA}^3$                         | 1467.16(4)                                                       |
| Z                                              | 2                                                                |
| $\rho_{\text{calc}}/\text{g/cm}^3$             | 1.1466                                                           |
| $\mu/\text{mm}^{-1}$                           | 0.590                                                            |
| F(000)                                         | 529.7                                                            |
| Crystal size/ $\text{mm}^3$                    | $0.05 \times 0.02 \times 0.02$                                   |
| Radiation                                      | Cu K $\alpha$ ( $\lambda = 1.54184$ )                            |
| 2 $\Theta$ range for data collection/ $^\circ$ | 5.44 to 148.5                                                    |
| Index ranges                                   | $-9 \leq h \leq 9$ , $-11 \leq k \leq 14$ , $-20 \leq l \leq 19$ |
| Reflections collected                          | 14519                                                            |
| Independent reflections                        | 5712 [ $R_{\text{int}} = 0.0295$ , $R_{\text{sigma}} = 0.0388$ ] |
| Data/restraints/parameters                     | 5712/0/384                                                       |
| Goodness-of-fit on $F^2$                       | 1.214                                                            |

Final R indexes [ $I \geq 2\sigma(I)$ ]  $R_1 = 0.0905$ ,  $wR_2 = 0.2782$   
 Final R indexes [all data]  $R_1 = 0.1053$ ,  $wR_2 = 0.2986$   
 Largest diff. peak/hole /  $e \text{ \AA}^{-3}$  1.51/-0.32

**Table S9:** Crystal data and structure refinement for **4ac**

|                                                |                                                                    |
|------------------------------------------------|--------------------------------------------------------------------|
| Identification code                            | exp_1148                                                           |
| Empirical formula                              | $C_{25}H_{15}NO$                                                   |
| Formula weight                                 | 345.40                                                             |
| Temperature/K                                  | 296.21(10)                                                         |
| Crystal system                                 | triclinic                                                          |
| Space group                                    | P-1                                                                |
| $a/\text{\AA}$                                 | 9.7693(2)                                                          |
| $b/\text{\AA}$                                 | 10.1301(2)                                                         |
| $c/\text{\AA}$                                 | 10.3864(3)                                                         |
| $\alpha/^\circ$                                | 92.8322(18)                                                        |
| $\beta/^\circ$                                 | 117.303(2)                                                         |
| $\gamma/^\circ$                                | 100.9856(18)                                                       |
| Volume/ $\text{\AA}^3$                         | 885.53(4)                                                          |
| Z                                              | 2                                                                  |
| $\rho_{\text{calc}}/\text{g cm}^{-3}$          | 1.2953                                                             |
| $\mu/\text{mm}^{-1}$                           | 0.618                                                              |
| F(000)                                         | 361.1                                                              |
| Crystal size/ $\text{mm}^3$                    | $0.1 \times 0.03 \times 0.02$                                      |
| Radiation                                      | Cu $K\alpha$ ( $\lambda = 1.54184$ )                               |
| $2\Theta$ range for data collection/ $^\circ$  | 9 to 148.32                                                        |
| Index ranges                                   | $-12 \leq h \leq 10$ , $-12 \leq k \leq 11$ , $-12 \leq l \leq 12$ |
| Reflections collected                          | 8809                                                               |
| Independent reflections                        | 3458 [ $R_{\text{int}} = 0.0314$ , $R_{\text{sigma}} = 0.0376$ ]   |
| Data/restraints/parameters                     | 3458/0/244                                                         |
| Goodness-of-fit on $F^2$                       | 1.034                                                              |
| Final R indexes [ $I \geq 2\sigma(I)$ ] $R_1$  | 0.0416, $wR_2 = 0.1064$                                            |
| Final R indexes [all data] $R_1$               | 0.0501, $wR_2 = 0.1128$                                            |
| Largest diff. peak/hole / $e \text{ \AA}^{-3}$ | 0.17/-0.24                                                         |

**Table S10:** Crystal data and structure refinement for **4ad**

|                     |                         |
|---------------------|-------------------------|
| Identification code | 23-08-19-3              |
| Empirical formula   | $C_{68}H_{46}I_2N_4O_8$ |
| Formula weight      | 1300.89                 |
| Temperature/K       | 150.00(10)              |
| Crystal system      | triclinic               |
| Space group         | P-1                     |
| $a/\text{\AA}$      | 9.4655(2)               |

|                                                |                                                                |
|------------------------------------------------|----------------------------------------------------------------|
| b/Å                                            | 11.3208(2)                                                     |
| c/Å                                            | 14.0572(3)                                                     |
| $\alpha/^\circ$                                | 86.973(2)                                                      |
| $\beta/^\circ$                                 | 89.871(2)                                                      |
| $\gamma/^\circ$                                | 76.103(2)                                                      |
| Volume/Å <sup>3</sup>                          | 1460.11(5)                                                     |
| Z                                              | 1                                                              |
| $\rho_{\text{calc}}/\text{g/cm}^3$             | 1.479                                                          |
| $\mu/\text{mm}^{-1}$                           | 8.949                                                          |
| F(000)                                         | 652.0                                                          |
| Crystal size/mm <sup>3</sup>                   | 0.07 × 0.07 × 0.07                                             |
| Radiation                                      | Cu K $\alpha$ ( $\lambda$ = 1.54184)                           |
| 2 $\theta$ range for data collection/ $^\circ$ | 6.3 to 148.22                                                  |
| Index ranges                                   | -11 ≤ h ≤ 10, -14 ≤ k ≤ 12, -17 ≤ l ≤ 12                       |
| Reflections collected                          | 15168                                                          |
| Independent reflections                        | 5668 [ $R_{\text{int}}$ = 0.0518, $R_{\text{sigma}}$ = 0.0405] |
| Data/restraints/parameters                     | 5668/35/395                                                    |
| Goodness-of-fit on F <sup>2</sup>              | 1.204                                                          |
| Final R indexes [ $I \geq 2\sigma(I)$ ]        | $R_1$ = 0.0588, $wR_2$ = 0.1448                                |
| Final R indexes [all data]                     | $R_1$ = 0.0592, $wR_2$ = 0.1449                                |
| Largest diff. peak/hole / e Å <sup>-3</sup>    | 1.19/-1.23                                                     |

### III. General procedures for the preparation of substrates

1. Substrates **1a-1k**<sup>1a</sup> and **1l, m**<sup>1b</sup> were known in the literature and prepared by following the literature procedure.

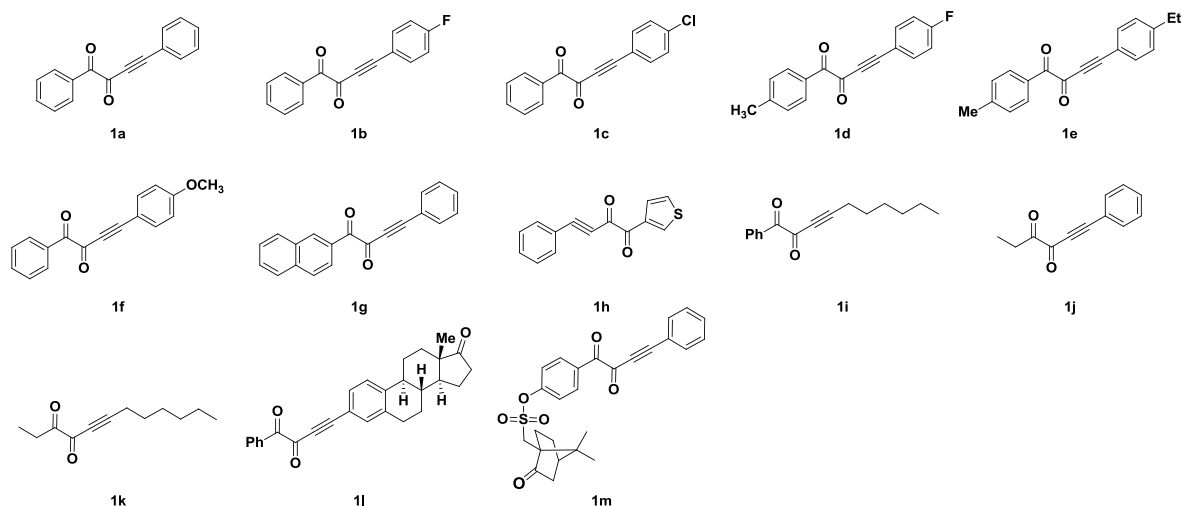

2. Substrates **2a-2e** were prepared according to the literature report.<sup>2a-b</sup>

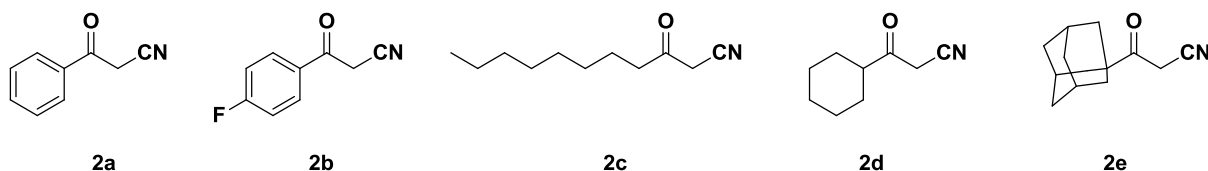

## References:

- (a) X. Kong, G. Zhang, S. Yang, X. Liu, X. Fang, *Adv. Synth. Catal.* **2017**, 359, 2729–2734; (b) Z. Zhang, X. Jiang, *Org. Lett.* 2014, 16, 4400–4403.
- (a) S. Havel, P. Khirsariya, N. Akavaram, K. Paruch, B. J.-P. Carbain, *J. Org. Chem.* **2018**, 83, 15380–15405; (b) C. Zheng, X. Zhang, M. Ijaz Hussain, M. Huang, Q. Liu, Y. Xiong, X. Zhu, *Tetrahedron Lett.* **2017**, 58, 574–577.

## IV. Typical procedure for the synthesis of compounds 3

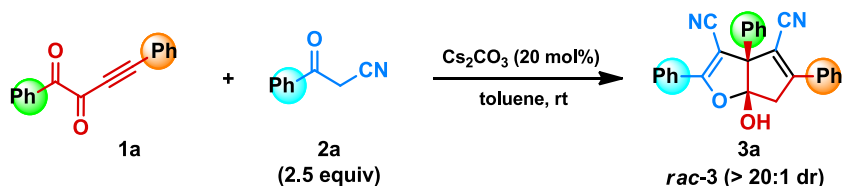

To a dried schlenk tube equipped with stirring bar was added **1a** (0.234 g, 1.0 mmol), **2a** (0.362 g, 2.5 mmol),  $\text{Cs}_2\text{CO}_3$  (0.65 g, 0.2 mmol, 20 mol%) under argon atmosphere. The tube was evacuated and back filled with argon for three times. Then 5 mL of dry toluene was added to the mixture, the resulted reaction mixture was allowed to stir at room temperature for 10 h. The progress of the reaction was monitored by the TLC. After completion of the reaction the solvent was removed under reduced pressure and the resulted residue was purified by column chromatography on silica gel using petroleum ether-ethyl acetate (10:1 v/v) as eluent to afford product **3a** (0.301 g, 75% yield).

## V. Typical procedure for the synthesis of compounds 4

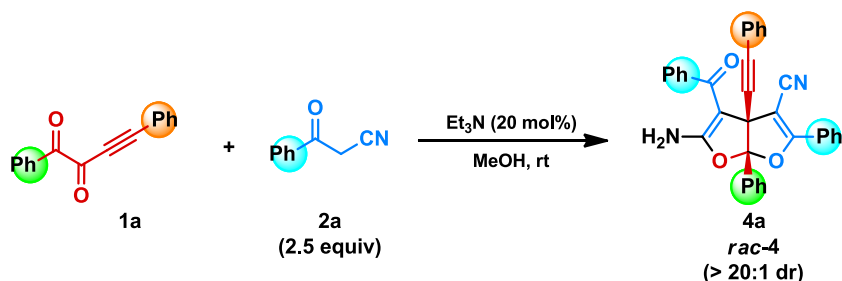

To a dried schlenk tube equipped with stirring bar was added **1a** (0.234 g 1.0 mmol), **2a** (0.362 g, 2.5 mmol),  $\text{Et}_3\text{N}$  (0.027 g, 0.2 mmol, 20 mol %) under argon atmosphere. The tube was evacuated and back filled with argon for three times. Then 5 mL of methanol was added

to the mixture, the resulted reaction mixture was allowed to stir at room temperature for 10 h. The progress of the reaction was monitored by the TLC. After completion of the reaction, the solvent was removed under reduced pressure and the resulted residue was purified by column chromatography on silica gel using petroleum ether-ethyl acetate (5:1 v/v) as eluent to afford product **4a** (0.400 g, 79% yield).

## VI. Typical procedure of the synthesis of compounds 5

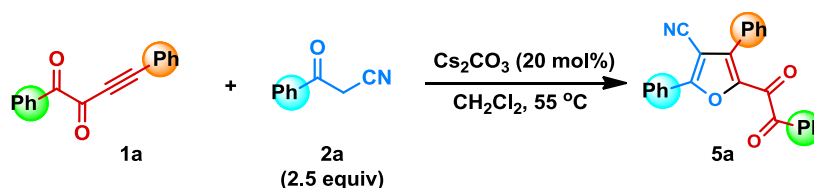

Substrate **1a** (0.234 g 1.0 mmol), **2a** (0.145 g, 1.0 mmol) and  $\text{Cs}_2\text{CO}_3$  (0.065 g, 0.2 mmol, 20 mol%) were added to a dried schlenk tube containing stirring bar, then 5 mL of dry  $\text{CH}_2\text{Cl}_2$  was added to it at room temperature under argon atmosphere. The resulted reaction mixture was allowed to stir at  $55\text{ }^\circ\text{C}$  using an oil bath for 5 h. The progress of the reaction was monitored by the TLC. After completion of the reaction, the solvent was removed under reduced pressure and the resulted residue was purified by column chromatography on silica gel using petroleum ether-ethyl acetate (5:1 v/v) as eluent to afford product **5a** (0.340 g, 79% yield).

## VII. Typical procedure of the synthesis of compounds 6a-6d

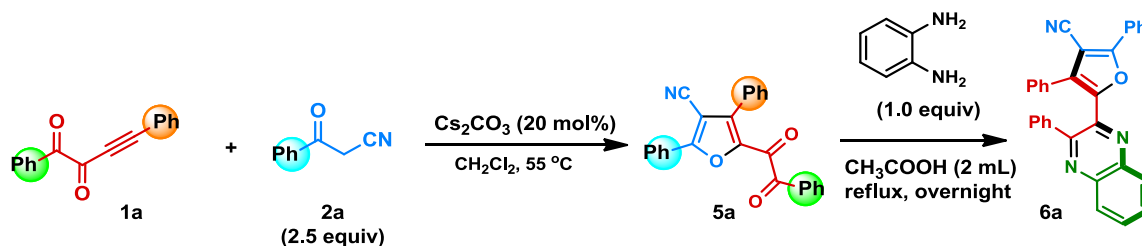

Substrate **1a** (0.234. g 1.0 mmol), **2a** (0.145 g, 1.0 mmol) and  $\text{Cs}_2\text{CO}_3$  (0.065 g, 0.2 mmol, 20 mol%) were added to a dried schlenk tube containing stirring bar, then 5 mL of dry  $\text{CH}_2\text{Cl}_2$  was added to it at room temperature under argon atmosphere. The resulted reaction mixture was allowed to stir at  $55\text{ }^\circ\text{C}$  using an oil bath for 5 h. The progress of the reaction was monitored by the TLC. After completion of the reaction, the solvent was removed by rota evaporator and the crude residue was used without purification. To this crude product 2 mL of acetic acid and benzene-1,2-diamine (0.108 g 1.00 mmol) were added. Then the reaction

mixture was refluxed using an oil bath overnight. After completion of the reaction, solvent was removed under reduced pressure. Water was added to it and the mixture was extracted with ethyl acetate (5 mL) for three times. The resulted organic layer was dried over  $\text{MgSO}_4$ . The solvent was removed under reduced pressure and the resulted residue was purified by column chromatography on silica gel using petroleum ether-ethyl acetate (10:1 v/v) as eluent to afford product **6a** (0.348 g, 78% yield).

### VIII. Typical procedure of the synthesis of compounds **6e-6g**, **6j**

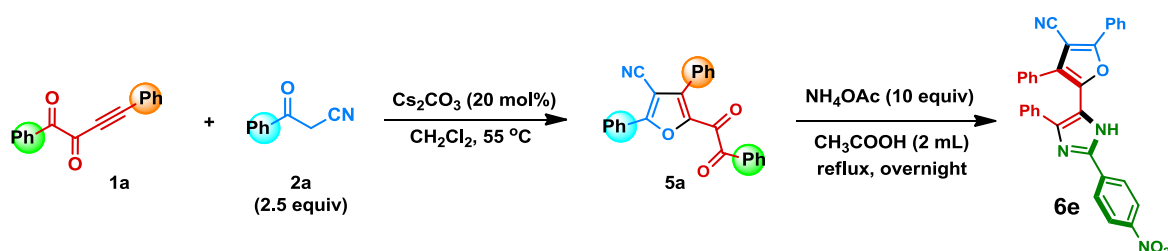

Substrate **1a** (0.234 g 1.0 mmol), **2a** (0.145 g, 1.0 mmol) and  $\text{Cs}_2\text{CO}_3$  (0.065 g, 0.2 mmol, 20 mol%) were added to a dried schlenk tube containing stirring bar, then 5 mL of dry  $\text{CH}_2\text{Cl}_2$  was added to it at room temperature under argon atmosphere. The resulted reaction mixture was allowed to stir at 55 °C using an oil bath for 5 h. The progress of the reaction was monitored by the TLC. After completion of the reaction the solvent was removed and the crude residue was used without purification. To this crude product 2 mL of acetic acid and aldehyde (0.151 g, 1.0 mmol) and  $\text{NH}_4\text{OAc}$  (0.771 g, 10.0 mmol) were added. Then the reaction mixture was refluxed using an oil bath overnight. After completion of the reaction, solvent was removed under reduced pressure. Water was added to it and the mixture was extracted with ethyl acetate (5 mL) for three times. The resulted organic layer was dried over  $\text{MgSO}_4$ . The solvent was removed under reduced pressure and the resulted residue was purified by column chromatography on silica gel using petroleum ether-ethyl acetate (10:1 v/v) as eluent to afford product **6e** (0.418 g, 83% yield).

### IX. Typical procedure of the synthesis of compounds **6h-6j**

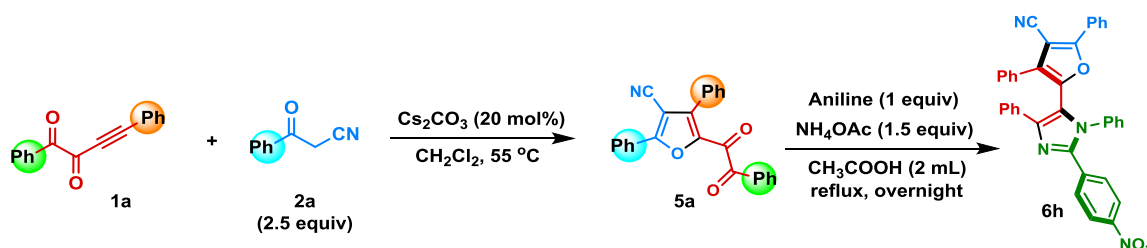

Substrate **1a** (0.234 g 1.0 mmol), **2a** (0.145 g, 1.0 mmol) and Cs<sub>2</sub>CO<sub>3</sub> (0.065 g, 0.2 mmol, 20 mol%) were added to a dried schlenk tube containing stirring bar, then 5 mL of dry CH<sub>2</sub>Cl<sub>2</sub> was added to it at room temperature under argon atmosphere. The resulted reaction mixture was allowed to stir at 55 °C using an oil bath for 5 h. The progress of the reaction was monitored by the TLC. After completion of the reaction, the solvent was removed and the crude residue was used without purification. To this crude product 2 mL of acetic acid, aldehyde (0.151 g, 1.0 mmol), NH<sub>4</sub>OAc (0.115 g, 1.5 mmol), aniline (0.092 g 1.0 mmol) were added. Then the reaction mixture was refluxed using an oil bath overnight. After completion of the reaction, solvent was removed under reduced pressure. Water was added to it and the mixture was extracted with ethyl acetate (5 mL) for three times. The resulted organic layer was dried over MgSO<sub>4</sub>. The solvent was removed under reduced pressure and the resulted residue was purified by column chromatography on silica gel using petroleum ether-ethyl acetate (10:1 v/v) as eluent to afford product **6h** (0.452 g, 77% yield).

#### X. Typical procedure of the synthesis of compound **6k**

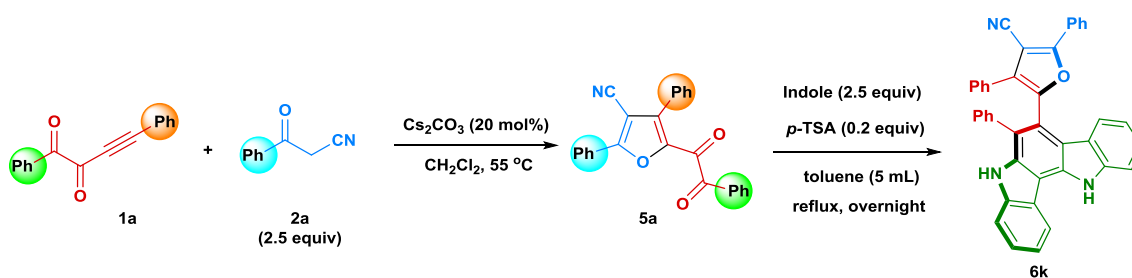

Substrate **1a** (0.234 g 1.00 mmol), **2a** (0.145 g, 1.00 mmol) and Cs<sub>2</sub>CO<sub>3</sub> (0.065 g, 0.2 mmol, 20 mol%) were added to a dried schlenk tube containing stirring bar, then 5 mL of dry CH<sub>2</sub>Cl<sub>2</sub> was added to it at room temperature under argon atmosphere. The resulted reaction mixture was allowed to stir at 55 °C using an oil bath for 5 h. The progress of the reaction was monitored by the TLC. After completion of the reaction the solvent was removed and the crude residue was used without purification. To this crude 5 mL of toluene, indole (0.292 g 2.5 mmol), *p*-TSA (0.034 g, 0.2 equiv) were added. Then the reaction mixture was refluxed using an oil bath for overnight. After completion of the reaction, the solvent was removed under reduced pressure and the resulted residue was purified by column chromatography on silica gel using petroleum ether-ethyl acetate (5:1 v/v) as eluent to afford product **6k** (0.414 g, 72% yield).

#### XI. Procedures for the derivatizations of products

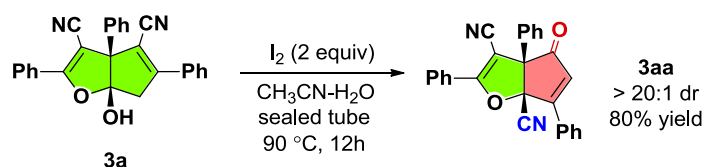

To a dried sealed tube equipped with stirring bar was added **3a** (0.402 g, 1.0 mmol), iodine (0.507, 2.0 mmol) under argon atmosphere. Then 10 mL of acetonitrile and water (9:1) added to it, the mixture was allowed to stir at 90 °C using an oil bath for overnight. After completion of reaction, the reaction mixture was diluted with water and extracted with ethyl acetate. The organic layer was washed with satd.  $\text{Na}_2\text{S}_2\text{O}_3$  solution and satd. brine, dried over anhydrous  $\text{MgSO}_4$  and concentrated under reduced pressure. The crude product was purified by column chromatography on silica gel using petroleum ether-ethyl acetate (10:1 v/v) as eluent to afford product **3aa** (0.325 g, 80% yield).

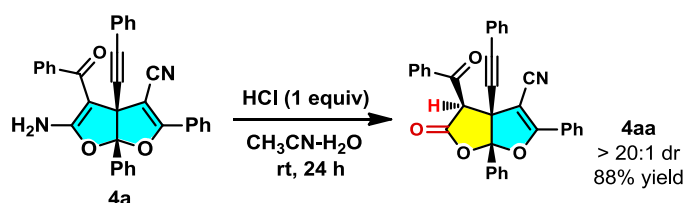

To a 50 mL round-bottom flask, **4a** (0.506 g, 1.0 mmol), acetonitrile (2 mL),  $\text{H}_2\text{O}$  (0.27 g, 1.5 mmol) and 4N HCl (75  $\mu\text{L}$ , 0.30 mmol) was sequentially added. The round-bottom flask was sealed and the reaction mixture was stirred at room temperature for 24 h. The progress of the reaction was monitored by the TLC. After completion of the reaction, the resulting mixture was diluted with water (10 mL) and extracted with ethyl acetate (3 x 10 mL). The combined organic layers were washed with satd. brine dried over anhydrous  $\text{MgSO}_4$  and concentrated in vacuo. The crude reaction mixture was purified by column chromatography on silica gel petroleum ether-ethyl acetate (5:1 v/v) to give **4aa** (0.450 g, 88% yield).

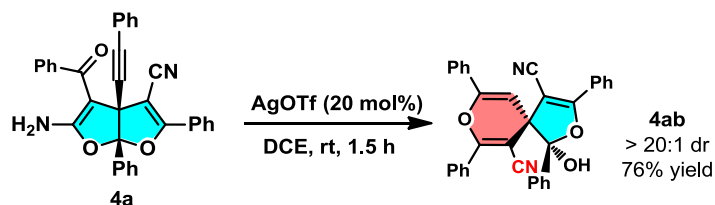

To a dried schlenk tube equipped with stirring bar, **4a** (0.506 g, 1.0 mmol), AgOTf (0.05 g, 0.2 mmol) were added under argon atmosphere. The tube was evacuated and back filled with argon for three times. Then 10 mL of dichloroethane was added to the mixture, the resulted reaction mixture was allowed to stir at room temperature for 1.5 h. The progress of the reaction was monitored by the TLC. After completion of the reaction, the solvent was removed under reduced pressure and the resulted residue was purified by column



chromatography on silica gel using petroleum ether-ethyl acetate (10:1 v/v) as eluent to afford product **4ab** (0.390 g, 76% yield).

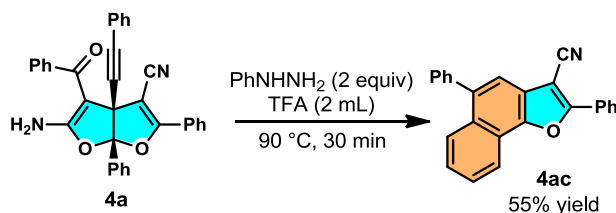

To a dried 50 mL round-bottom flask equipped with stirring bar, **4a** (0.506 g, 1 mmol), phenyl hydrazine (0.196 g, 2 mmol) and TFA (2 mL) were added under argon atmosphere.. Then the reaction mixture was stirred at 90 °C using an oil bath for 5 h. The progress of the reaction was monitored by the TLC. After completion of the reaction, the solvent was removed under reduced pressure and the resulted residue was purified by column chromatography on silica gel using petroleum ether-ethyl acetate (10:1 v/v) as eluent to afford product **4ac** (0.191 g, 55% yield).

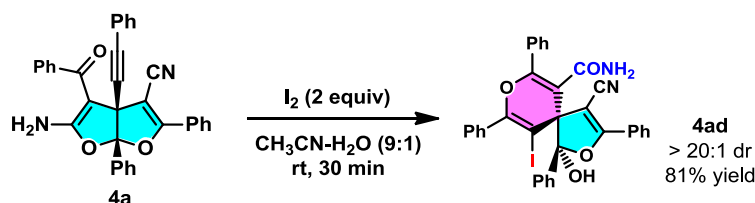

To a solution of **4a** (0.505 g, 1.0 mmol) in acetonitrile and water (9:1) was added iodine (0.507 g, 2.0 mmol). The mixture was allowed to stirred at room temperature for 30 min. The progress of the reaction was monitored by the TLC. After completion of reaction, the reaction mixture was diluted with water and extracted with ethyl acetate. The organic layer was washed with satd.  $\text{Na}_2\text{S}_2\text{O}_3$  solution and satd. brine, dried over anhydrous  $\text{MgSO}_4$  and concentrated under reduced pressure. The crude product was purified by column chromatography on silica gel using petroleum ether-ethyl acetate (10:1 v/v) as eluent to afford product **4ad** (0.531 g, 81% yield).

## XII. Characterization of new compounds

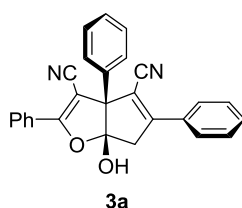

**6a-hydroxy-2,3a,5-triphenyl-6,6a-dihydro-3aH-cyclopenta[b]furan-3,4-dicarbonitrile**

**(3a):** Purified using petroleum ether-ethyl acetate (10:1 v/v). White solid, mp 203–204 °C, 0.301 g, 75% yield. <sup>1</sup>H NMR (600 MHz, CDCl<sub>3</sub>) δ 8.11 (d, *J* = 7.2 Hz, 2H), 7.87 (s, 2H), 7.56–7.44 (m, 11H), 3.72 (d, *J* = 18.7 Hz, 1H), 3.54 (d, *J* = 18.7 Hz, 1H), 3.19 (s, 1H); <sup>13</sup>C NMR (100 MHz, CDCl<sub>3</sub>) δ 167.0, 155.0, 132.5, 132.0, 131.6, 131.5, 130.0, 129.8, 129.1, 129.0, 127.7, 127.7, 127.6, 127.0, 115.8, 115.6, 114.8, 109.0, 85.2, 72.1, 47.4; HRMS (ESI, *m/z*): calcd. for C<sub>27</sub>H<sub>18</sub>O<sub>2</sub>N<sub>2</sub>Na<sup>+</sup> 425.1260, found 425.1256; IR (KBr thin film, cm<sup>-1</sup>): ν 3564, 3328, 2922, 2209, 1616, 1495, 1448, 1356, 1262, 1182, 764.

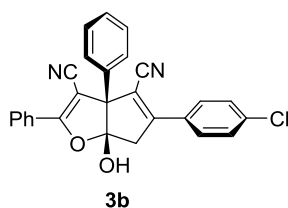

**5-(4-chlorophenyl)-6a-hydroxy-2,3a-diphenyl-6,6a-dihydro-3aH-cyclopenta[b]furan-3,4-**

**dicarbonitrile (3b):** Purified using petroleum ether-ethyl acetate (10:1 v/v). White solid, mp 203–204 °C, 0.353 g, 81% yield. <sup>1</sup>H NMR (400 MHz, DMSO-*d*<sub>6</sub>) δ 8.21 (s, 1H), 7.99–7.91 (m, 4H), 7.64–7.42 (m, 9H), 3.75 (d, *J* = 18.7 Hz, 5H), 3.49 (d, *J* = 18.1 Hz, 2H), 2.08 (s, 1H); <sup>13</sup>C NMR (100 MHz, DMSO-*d*<sub>6</sub>) δ 168.6, 155.1, 136.3, 133.7, 133.0, 131.2, 130.1, 129.6, 129.5, 129.2, 129.0, 128.5, 127.8, 127.6, 117.5, 117.0, 116.3, 109.4, 84.7, 71.3, 46.0; HRMS (ESI, *m/z*): calcd. for C<sub>27</sub>H<sub>17</sub>ClN<sub>2</sub>O<sub>2</sub>Na<sup>+</sup> 459.0871, found 459.0869; IR (KBr thin film, cm<sup>-1</sup>): ν 3561, 2920, 2213, 1648, 1280, 1268, 1100, 764, 694.

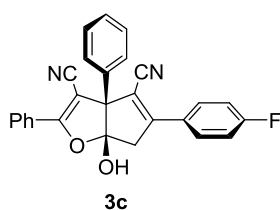

**5-(4-fluorophenyl)-6a-hydroxy-2,3a-diphenyl-6,6a-dihydro-3aH-cyclopenta[b]furan-3,4-**

**dicarbonitrile (3c):** Purified using petroleum ether-ethyl acetate (10:1 v/v). White solid, mp 168–169 °C, 0.327 g, 78% yield. <sup>1</sup>H NMR (600 MHz, CDCl<sub>3</sub>) δ 8.05 (d, *J* = 8.7 Hz, 2H), 7.89–7.86 (m, 2H), 7.55–7.43 (m, 10H), 3.71 (d, *J* = 18.7 Hz, 1H), 3.54 (d, *J* = 18.7 Hz, 1H), 3.24 (s, 1H); <sup>13</sup>C NMR (150 MHz CDCl<sub>3</sub>) δ 165.9, 155.0, 138.8, 131.9, 131.6, 130.0, 129.9, 129.4, 129.2, 129.0, 127.8 (d, *J* = 3.5 Hz), 125.6, 115.6 (d, *J* = 6.1 Hz), 115.0, 108.9, 85.7, 72.2, 47.4; IR (KBr thin film, cm<sup>-1</sup>): ν 3436, 2922, 2232, 1671, 1659, 1596, 1505, 1420, 1385, 1238, 1094, 860, 834, 753.

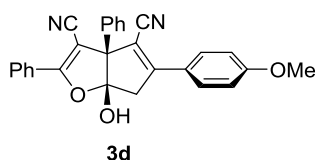

**6a-hydroxy-5-(4-methoxyphenyl)-2,3a-diphenyl-6,6a-dihydro-3aH-cyclopenta[b]furan-3,4-dicarbonitrile (3d):** Purified using petroleum ether-ethyl acetate (10:1 v/v). White solid, mp 178–177 °C, 0.300 g, 69% yield.  $^1\text{H}$  NMR (400 MHz, DMSO- $\text{D}_6$ )  $\delta$  8.15 (s, 1H), 8.01 (d,  $J$  = 6.9 Hz, 2H), 7.90 (d,  $J$  = 8.5 Hz, 2H), 7.65–7.62 (m, 2H), 7.53–7.49 (m, 2H), 7.46–7.39 (m, 3H), 7.12 (d,  $J$  = 8.5 Hz, 2H), 3.84 (s, 3H), 3.75 (d,  $J$  = 18.9 Hz, 1H), 3.43 (d,  $J$  = 18.9 Hz, 1H);  $^{13}\text{C}$  NMR (100 MHz, DMSO- $\text{D}_6$ )  $\delta$  168.3, 162.0, 155.4, 134.1, 132.9, 130.1, 129.6, 129.2, 128.9, 128.5, 127.9, 127.6, 124.7, 117.1, 117.1 114.9, 106.0, 85.2, 71.1, 56.0, 45.9; HRMS (ESI,  $m/z$ ): calcd. for  $\text{C}_{28}\text{H}_{20}\text{O}_3 \text{N}_2\text{Na}^+$  455.1366, found 455.1369; IR (KBr thin film,  $\text{cm}^{-1}$ ):  $\nu$  3311, 2928, 2210, 1650, 1507, 1458, 1274, 1018, 838, 764, 750, 694.

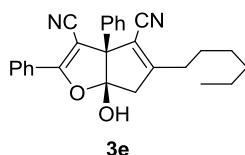

**5-hexyl-6a-hydroxy-2,3a-diphenyl-6,6a-dihydro-3aH-cyclopenta[b]furan-3,4-dicarbonitrile (3e):** Purified using petroleum ether-ethyl acetate (10:1 v/v). Colourless liquid, 0.253 g, 62% yield.  $^1\text{H}$  NMR (600 MHz,  $\text{CDCl}_3$ )  $\delta$  8.07 (d,  $J$  = 7.6 Hz, 2H), 7.57–7.53 (m, 1H), 7.49 (t,  $J$  = 6.9 Hz, 4H), 7.49–7.42 (m, 1H), 7.35 (d,  $J$  = 7.4 Hz, 2H), 3.20 (d,  $J$  = 19.2 Hz, 1H), 3.04 (d,  $J$  = 19.2 Hz, 1H), 2.64–2.48 (m, 2H), 1.61–1.56 (m, 2H), 1.43–1.29 (m, 6H), 0.89 (s, 3H);  $^{13}\text{C}$  NMR (100 MHz,  $\text{CDCl}_3$ )  $\delta$  166.8, 163.1, 132.4, 132.2, 129.8, 129.6, 128.9, 127.6, 127.5, 127.2, 115.9, 115.8, 114.2, 111.8, 85.2, 71.0, 47.3, 31.4, 31.2, 28.9, 27.3, 22.5, 14.0; HRMS (ESI,  $m/z$ ): calcd. for  $\text{C}_{27}\text{H}_{26}\text{O}_2 \text{N}_2\text{Na}^+$  433.1886, found 433.1888; IR (KBr thin film,  $\text{cm}^{-1}$ ):  $\nu$  3337, 2925, 2207, 1648, 1450, 1341, 1256, 1091, 764, 750.

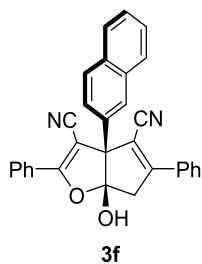

**6a-hydroxy-3a-(naphthalen-2-yl)-2,5-diphenyl-6,6a-dihydro-3aH-cyclopenta[*b*]furan-**

**3,4-dicarbonitrile (3f):** Purified using petroleum ether-ethyl acetate (10:1 v/v). White solid, mp 152–153 °C, 0.332 g, 73% yield. <sup>1</sup>H NMR (600 MHz, CDCl<sub>3</sub>) δ 8.19–8.11 (m, 2H), 8.02–7.87 (m, 6H), 7.58–7.47 (m, 9H), 3.75 (d, *J* = 18.8 Hz, 1H), 3.59 (d, *J* = 18.8 Hz, 1H), 3.32 (s, 1H); <sup>13</sup>CNMR (150 MHz, CDCl<sub>3</sub>) δ 167.1, 155.0, 133.6, 133.4, 132.5, 131.7, 131.5, 129.9, 129.5, 129.1, 129.0, 128.4, 127.8, 127.7, 127.7 127.6, 127.3, 127.1, 127.0, 124.5, 115.8, 115.6, 109.1, 85.2, 72.2, 47.5; HRMS (ESI, *m/z*): calcd. for C<sub>31</sub>H<sub>20</sub>O<sub>2</sub> N<sub>2</sub>Na<sup>+</sup> 475.1417, found 475.1414; IR (KBr thin film, cm<sup>-1</sup>): ν 3417, 2928, 2204, 1648, 1462, 1286, 1141, 763, 753, 697.

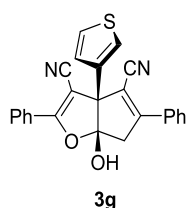

**6a-hydroxy-2,5-diphenyl-3a-(thiophen-3-yl)-6,6a-dihydro-3aH-cyclopenta[*b*]furan-3,4-**

**dicarbonitrile (3g):** Purified using petroleum ether-ethyl acetate (10:1 v/v). White solid, mp 180–181 °C, 0.292 g, 72% yield. <sup>1</sup>H NMR (400 MHz, DMSO-*d*<sub>6</sub>) δ 8.40 (s, 1H), 8.00 (d, *J* = 7.0 Hz, 2H), 7.89 (d, *J* = 3.4 Hz, 2H), 7.71–7.57 (m, 6H), 7.21 (s, 2H), 3.81 (d, *J* = 19.1 Hz, 1H), 3.53 (d, *J* = 19.1 Hz, 1H); <sup>13</sup>C NMR (100 MHz, DMSO-*d*<sub>6</sub>) δ 168.4, 156.2, 137.6, 133.1, 132.1, 131.9, 129.7, 129.6, 128.2, 128.2, 128.1, 127.7, 127.6, 117.0, 116.7, 116.3, 109.2, 85.0, 68.4, 45.6; HRMS (ESI, *m/z*): calcd. for C<sub>25</sub>H<sub>16</sub>O<sub>2</sub> N<sub>2</sub>NaS<sup>+</sup> 431.0825, found 431.0826; IR (KBr thin film, cm<sup>-1</sup>): ν 3405, 2928, 2204, 1656, 1389, 1280, 1262, 1024, 1262, 763, 747.

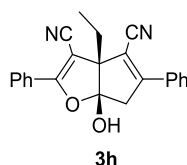

**3a-ethyl-6a-hydroxy-2,5-diphenyl-6,6a-dihydro-3aH-cyclopenta[*b*]furan-3,4**

**dicarbonitrile (3h):** Purified using petroleum ether-ethyl acetate (10:1 v/v). White solid, mp 152–153 °C, 0.240 g, 67% yield. <sup>1</sup>H NMR (400 MHz, DMSO-*d*<sub>6</sub>) δ 8.50 (s, 1H), 7.92 (d, *J* = 6.6 Hz, 2H), 7.81 (d, *J* = 2.9 Hz, 2H), 7.60 (d, *J* = 7.0 Hz, 3H), 7.53 (s, 2H), 3.71 (d, *J* = 19.0 Hz, 1H), 3.45 (d, *J* = 19.0 Hz, 1H), 2.04 (q, *J* = 7.3 Hz, 2H), 1.01 (t, *J* = 7.2 Hz, 3H); <sup>13</sup>CNMR (150 MHz, DMSO-*d*<sub>6</sub>) δ 166.5, 154.9, 132.8, 132.4, 131.5, 129.6, 129.5, 127.9,

127.5, 117.4, 116.9, 116.2, 108.6, 85.4, 65.8, 47.3, 23.5, 8.9; HRMS (ESI,  $m/z$ ): calcd. for  $C_{23}H_{18}O_2 N_2Na^+$  377.1260, found 377.1264; IR (KBr thin film,  $cm^{-1}$ ):  $\nu$  3387, 3320, 2981, 2207, 1698, 1618, 1495, 1347, 1185, 997.

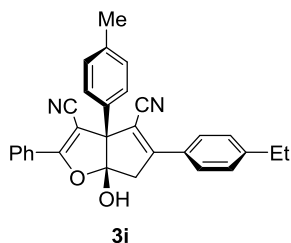

**5-(4-ethylphenyl)-6a-hydroxy-2-phenyl-3a-(p-tolyl)-6,6a-dihydro-3aH-**

**cyclopenta[*b*]furan-3,4-dicarbonitrile (3i):** Purified using petroleum ether-ethyl acetate (10:1 v/v). White solid, mp 174–175 °C, 0.332 g, 74% yield.  $^1H$  NMR (400 MHz,  $CDCl_3$ )  $\delta$  8.08 (d,  $J$  = 6.3 Hz, 2H), 7.79 (d,  $J$  = 6.8 Hz, 2H), 7.53–7.46 (m, 3H), 7.29 (s, 6H), 3.67 (d,  $J$  = 18.5 Hz, 2H), 3.48 (d,  $J$  = 18.5 Hz, 2H), 3.43 (s, 1H), 2.71 (d,  $J$  = 6.8 Hz, 2H), 2.37 (s, 3H), 1.26 (s, 3H);  $^{13}C$  NMR (150 MHz,  $CDCl_3$ )  $\delta$  167.0, 154.7, 148.3, 139.7, 132.3, 130.4, 129.2, 129.1, 128.6, 128.5, 127.8, 127.8, 127.7, 127.6, 127.2, 115.9, 114.8, 107.9, 85.3, 71.8, 47.1, 34.7, 28.9, 15.3; HRMS (ESI,  $m/z$ ): calcd. for  $C_{30}H_{24}O_2 N_2Na^+$  467.1730, found 467.1729; IR (KBr thin film,  $cm^{-1}$ ):  $\nu$  3399, 2920, 2207, 1647, 1600, 1509, 1462, 1260, 1182, 764, 744, 700.

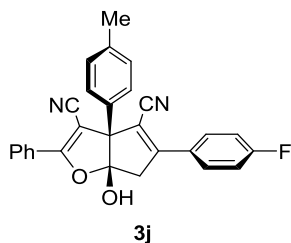

**5-(4-fluorophenyl)-6a-hydroxy-2-phenyl-3a-(p-tolyl)-6,6a-dihydro-3aH-**

**cyclopenta[*b*]furan-3,4-dicarbonitrile (3j):** Purified using petroleum ether-ethyl acetate (10:1 v/v). White solid, mp 160–161 °C, 0.348 g, 80% yield.  $^1H$  NMR (400 MHz,  $DMSO-d_6$ )  $\delta$  8.18 (s, 1H), 8.04 (s, 4H), 7.68 (s, 3H), 7.49–7.44 (m, 2H), 7.35 (s, 3H), 3.79 (d,  $J$  = 18.7 Hz, 1H), 3.51 (d,  $J$  = 18.8 Hz, 1H), 2.40 (s, 3H);  $^{13}C$  NMR (100 MHz,  $DMSO-d_6$ )  $\delta$  168.4, 165.1, 162.6, 154.9, 138.4, 132.9, 130.8 (d,  $J$  = 9.0 Hz), 129.8, 129.6, 128.9 (d,  $J$  = 3.0 Hz), 128.4, 127.9, 127.6, 117.4, 117.0, 116.7, 116.5, 108.8, 85.0, 71.0, 46.2, 21.2; HRMS (ESI,  $m/z$ ): calcd. for  $C_{28}H_{19}O_2 N_2F Na^+$  457.1323, found 457.1320; IR (KBr thin film,  $cm^{-1}$ ):

$\nu$  3355, 3078, 2916, 2206, 1745, 1615, 1602, 1512, 1447, 1341, 1274, 1188, 1024, 1002, 844, 764, 750.

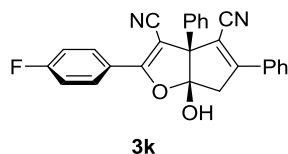

**2-(4-fluorophenyl)-6a-hydroxy-3a,5-diphenyl-6,6a-dihydro-3aH-cyclopenta[b]furan-3,4-dicarbonitrile (3k):** Purified using petroleum ether-ethyl acetate (10:1 v/v). White solid, mp 165–167 °C, 0.327 g, 78% yield.  $^1\text{H}$  NMR (400 MHz,  $\text{CDCl}_3$ )  $\delta$  8.02 (d,  $J$  = 6.4 Hz, 2H), 7.85 (s, 2H), 7.50–7.42 (m, 10H), 3.69 (d,  $J$  = 18.5 Hz, 1H), 3.50 (d,  $J$  = 18.4 Hz, 2H);  $^{13}\text{C}$  NMR (100 MHz,  $\text{CDCl}_3$ )  $\delta$  166.2, 155.0, 138.7, 131.9, 131.6, 129.8, 129.8, 129.3, 129.2, 128.9, 127.7 (d,  $J$  = 2.0 Hz), 125.5, 115.7, 115.6, 115.1, 108.7, 85.4, 72.0, 47.1; IR (KBr thin film,  $\text{cm}^{-1}$ ):  $\nu$  3420, 3317, 2925, 2222, 1652, 1490, 1458, 1274, 1088, 1018, 841, 759.

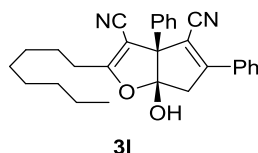

**6a-hydroxy-2-octyl-3a,5-diphenyl-6,6a-dihydro-3aH-cyclopenta[b]furan-3,4-dicarbonitrile (3l):** Purified using petroleum ether-ethyl acetate (10:1 v/v). White solid, mp 120–121 °C, 0.334 g, 77% yield.  $^1\text{H}$  NMR (600 MHz,  $\text{CDCl}_3$ )  $\delta$  7.86–7.83 (m, 2H), 7.52–7.49 (m, 5H), 7.47–7.43 (m 1H), 7.40–7.33 (m, 2H), 3.57 (d,  $J$  = 18.7 Hz, 1H), 3.47 (d,  $J$  = 18.7 Hz, 1H), 2.61–2.51 (m, 2H), 1.71–1.64 (m, 2H), 1.41–1.23 (m, 10 H), 0.87 (t,  $J$  = 7.0 Hz, 3H);  $^{13}\text{C}$  NMR (100 MHz,  $\text{CDCl}_3$ )  $\delta$  174.2, 153.5, 131.1, 130.6, 130.4, 128.8, 128.6, 128.1, 126.6, 126.5, 114.8, 114.5, 113.7, 108.3, 86.5, 70.1, 46.3, 30.7, 28.1, 28.0, 28.0, 27.4, 25.2, 21.6, 13.0; HRMS (ESI,  $m/z$ ): calcd. for  $\text{C}_{29}\text{H}_{30}\text{O}_2\text{N}_2\text{Na}^+$  461.2199, found 461.2196; IR (KBr thin film,  $\text{cm}^{-1}$ ):  $\nu$  3367, 2925, 2213, 1642, 1456, 1259, 1194, 991, 991, 753, 691.

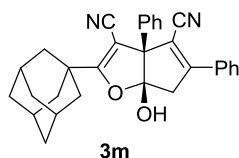

**2-(adamantan-1-yl)-6a-hydroxy-3a,5-diphenyl-6,6a-dihydro-3aH-cyclopenta[b]furan-3,4-dicarbonitrile (3m):** Purified using petroleum ether-ethyl acetate (10:1 v/v). White solid, mp 208–209 °C, 0.318 g, 69% yield.  $^1\text{H}$  NMR (400 MHz,  $\text{DMSO}-d_6$ )  $\delta$  7.88–7.86 (m, 2H),

7.56 (s, 3H), 7.48 (t,  $J = 7.2$  Hz, 2H), 7.42–7.38 (m, 1H), 7.33 (d,  $J = 7.4$  Hz, 2H), 3.56 (d,  $J = 18.8$  Hz, 1H), 3.37 (d,  $J = 18.8$  Hz, 1H), 3.35 (s, 1H), 2.01 (s, 9H), 1.71 (s, 6H);  $^{13}\text{C}$  NMR (100 MHz, DMSO- $\text{D}_6$ )  $\delta$  180.6, 156.0, 134.1, 132.5, 131.6, 129.5, 129.0, 128.7, 128.5, 128.1, 116.7, 116.5, 116.3, 109.1, 83.6, 79.7, 70.7, 46.5, 39.2, 37.3, 36.3, 27.7; HRMS (ESI,  $m/z$ ): calcd. for  $\text{C}_{31}\text{H}_{28}\text{O}_2\text{N}_2\text{Na}^+$  483.2043, found 483.2042; IR (KBr thin film,  $\text{cm}^{-1}$ ):  $\nu$  3334, 2910, 2212, 1692, 1612, 1453, 1268, 1180, 1100, 844, 751, 697.

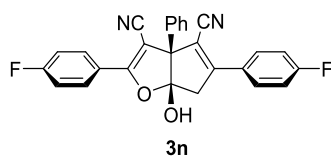

**2,5-bis(4-fluorophenyl)-6a-hydroxy-3a-phenyl-6,6a-dihydro-3aH-cyclopenta[b]furan-3,4-dicarbonitrile (3n):** Purified using petroleum ether-ethyl acetate (10:1 v/v). White solid, mp 184–185 °C, 0.333 g, 77% yield.  $^1\text{H}$  NMR (600 MHz,  $\text{CD}_3\text{OD}$ )  $\delta$  8.05 (d,  $J = 8.4$  Hz, 2H), 7.94 (dd,  $J = 8.2, 5.3$  Hz, 2H), 7.55 (d,  $J = 8.4$  Hz, 2H), 7.50–7.46 (m, 2H), 7.41 (d,  $J = 7.4$  Hz, 3H), 7.26 (t,  $J = 8.6$  Hz, 2H), 3.43 (s, 1H), 3.30 (s, H), 3.29 (s, 1H);  $^{13}\text{C}$  NMR (150 MHz,  $\text{CD}_3\text{OD}$ )  $\delta$  167.7, 165.0, 163.4, 154.1, 138.0, 133.2, 129.9 (d,  $J = 8.8$  Hz), 129.0, 128.8, 128.6, 128.5, 127.9, 126.6, 116.2, 115.8, 115.7, 115.5, 85.0, 71.2; IR (KBr thin film,  $\text{cm}^{-1}$ ):  $\nu$  3293, 2924, 2211, 1598, 1508, 1495, 1339, 1259, 1100, 1006, 844, 744.

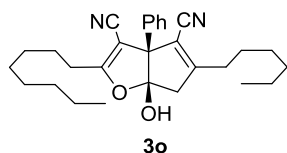

**5-hexyl-6a-hydroxy-2-octyl-3a-phenyl-6,6a-dihydro-3aH-cyclopenta[b]furan-3,4-dicarbonitrile (3o):** Purified using petroleum ether-ethyl acetate (10:1 v/v). Colourless liquid, 0.298 g, 67% yield.  $^1\text{H}$  NMR (600 MHz,  $\text{CDCl}_3$ )  $\delta$  7.48 (t,  $J = 7.5$  Hz, 2H), 7.42 (t,  $J = 7.3$  Hz, 1H), 7.28–7.24 (m, 2H), 3.07 (d,  $J = 19.3$  Hz, 1H), 2.97 (d,  $J = 19.3$  Hz, 1H), 2.86 (s, 1H), 2.58–2.49 (m, 3H), 1.66–1.61 (m, 2H), 1.58–1.53 (m, 3H), 1.37–1.23 (m, 16H), 0.91–0.86 (m, 6H);  $^{13}\text{C}$  NMR (150 MHz,  $\text{CDCl}_3$ )  $\delta$  174.8, 162.6, 132.2, 129.9, 129.6, 127.5, 116.8, 114.7, 114.1, 112.2, 87.8, 70.2, 47.5, 31.9, 31.5, 31.2, 29.2, 29.2, 29.1, 28.9, 28.4, 27.4, 26.4, 22.7, 22.6, 14.2, 14.1; HRMS (ESI,  $m/z$ ): calcd. for  $\text{C}_{29}\text{H}_{38}\text{O}_2\text{N}_2\text{Na}^+$  469.2825, found 469.2830; IR (KBr thin film,  $\text{cm}^{-1}$ ):  $\nu$  3361, 2955, 2216, 1642, 1465, 1262, 1188, 1085, 971, 749.

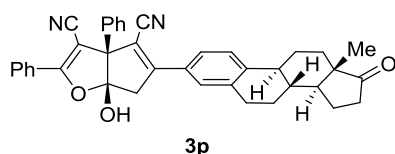

**6a-hydroxy-5-((8*R*,9*S*,13*S*,14*S*)-13-methyl-17-oxo-7,8,9,11,12,13,14,15,16,17-decahydro-6*H*-cyclopenta[*a*]phenanthren-3-yl)-2,3a-diphenyl-6,6a-dihydro-3a*H*-cyclopenta[*b*]furan-3,4-dicarbonitrile (3p):**

Purified using petroleum ether-ethyl acetate (10:1 v/v). Colourless gummy liquid, 0.455 g, 78% yield.  $^1\text{H}$  NMR (600 MHz,  $\text{CDCl}_3$ )  $\delta$  8.08 (d,  $J = 7.6$  Hz, 2H), 7.86–7.84 (m, 2H), 7.56–7.53 (m, 1H), 7.50–7.47 (m, 6H), 7.40 (dd,  $J = 8.7, 1.6$  Hz, 2H), 3.80 (dd,  $J = 15.0, 2.5$  Hz, 1H), 3.67 (d,  $J = 18.8$  Hz, 1H), 3.50 (dd,  $J = 18.7, 1.2$  Hz, 1H), 3.23 (dd,  $J = 15.0, 2.7$  Hz, 1H), 2.51–2.45 (m, 1H), 2.42–2.37 (m, 1H), 2.14 (t,  $J = 4.4$  Hz, 1H), 2.11–2.04 (m, 1H), 1.95 (d,  $J = 18.6$  Hz, 1H), 1.75–1.69 (m, 1H), 1.47–1.41 (m, 1H), 1.30–1.24 (m, 1H), 1.13 (s, 3H), 1.04 (t,  $J = 7.2$  Hz, 1H), 0.90 (d,  $J = 2.7$  Hz, 4H);  $^{13}\text{C}$  NMR (150 MHz,  $\text{CDCl}_3$ )  $\delta$  214.3, 167.8, 155.2, 149.8, 132.6, 131.8, 131.7, 131.6, 129.9, 129.2, 129.0, 127.8, 127.7, 127.3, 123.1, 116.3, 115.6, 108.7, 84.8, 71.4, 58.3, 48.2, 48.2, 48.1, 47.0, 42.9, 42.5, 26.9, 25.3, 19.9, 19.8; HRMS (ESI,  $m/z$ ): calcd. for  $\text{C}_{39}\text{H}_{34}\text{O}_3 \text{N}_2\text{Na}^+$  601.2462, found 601.2456; IR (KBr thin film,  $\text{cm}^{-1}$ ):  $\nu$  3352, 2934, 2204, 1739, 1453, 1386, 1268, 1200, 1088, 749, 694.

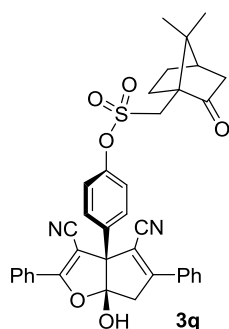

**4-(3,4-dicyano-6a-hydroxy-2,5-diphenyl-6,6a-dihydro-3a*H*-cyclopenta[*b*]furan-3a-yl)phenyl ((1*R*,4*R*)-7,7-dimethyl-2-oxobicyclo[2.2.1]heptan-1-yl)methanesulfonate (3q):**

Purified using petroleum ether-ethyl acetate (10:1 v/v). Colourless gummy liquid, 0.491 g, 77% yield.  $^1\text{H}$  NMR (400 MHz,  $\text{CDCl}_3$ )  $\delta$  8.00 (d,  $J = 7.6$  Hz, 2H), 7.83–7.74 (m, 2H), 7.49–7.37 (m, 7H), 7.30 (d,  $J = 8.2$  Hz, 2H), 7.19 (s, 1H), 4.23 (s, 1H), 3.70 (d,  $J = 15.0$  Hz, 1H), 3.59 (d,  $J = 18.7$  Hz, 1H), 3.42 (d,  $J = 18.7$  Hz, 1H), 3.13 (d,  $J = 15.0$  Hz, 1H), 2.41–2.27 (m, 2H), 2.05–1.97 (m, 1H), 1.85 (d,  $J = 18.6$  Hz, 1H), 1.69–1.58 (m, 1H), 1.37–1.33 (m, 1H), 1.22–1.15 (m, 1H), 1.04 (s, 3H), 0.80 (s, 3H);  $^{13}\text{C}$  NMR (150 MHz,  $\text{CDCl}_3$ )  $\delta$  213.4, 166.7, 154.1, 148.6, 131.5, 130.7, 130.5, 130.5, 128.8, 128.1, 127.9, 126.7, 126.6, 126.0, 121.9,



114.8, 114.5, 114.3, 107.6, 83.7, 70.2, 57.1, 47.1, 47.0, 45.8, 41.8, 41.4, 25.8, 24.1, 18.8, 18.7; HRMS (ESI,  $m/z$ ): calcd. for  $C_{37}H_{32}O_6N_2NaS^+$  655.1873, found 655.1869; IR (KBr thin film,  $cm^{-1}$ ):  $\nu$  3305, 3193, 2920, 2204, 1748, 1645, 1506, 1271, 1015, 865, 764, 753, 691.

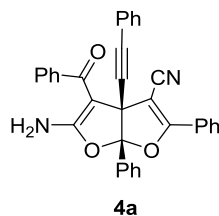

**5-amino-4-benzoyl-2,6a-diphenyl-3a-(phenylethynyl)-3a,6a-dihydrofuro[2,3-*b*]furan-3-carbonitrile (4a):** Purified using petroleum ether-ethyl acetate (5:1 v/v). White solid, mp 210–211 °C, 0.400 g, 79% yield.  $^1H$  NMR (400 MHz,  $CDCl_3$ )  $\delta$  8.01 (d,  $J$  = 6.1 Hz, 2H), 7.74 (d,  $J$  = 5.9 Hz, 2H), 7.64–7.28 (m, 10H), 7.25–7.15 (m, 3H), 6.81 (d,  $J$  = 5.8 Hz, 2H);  $^{13}C$  NMR (100 MHz,  $CDCl_3$ )  $\delta$  191.0, 167.6, 164.1, 139.8, 133.1, 131.3, 130.2, 129.3, 128.9, 127.9, 127.5, 127.3, 127.0, 126.8, 126.5, 126.5, 125.5, 125.2, 120.8, 120.1, 113.6, 91.4, 90.7, 90.1, 84.3, 60.0; HRMS (ESI,  $m/z$ ): calcd. for  $C_{34}H_{22}N_2O_3H^+$  507.1703, found 507.1701; IR (KBr thin film,  $cm^{-1}$ ):  $\nu$  3311, 2920, 2854, 2216, 1648, 1565, 1474, 1286, 1262, 1018, 1018, 763, 750, 697.

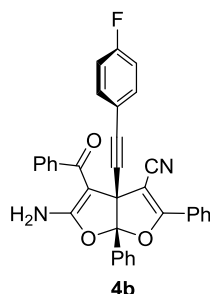

**5-amino-4-benzoyl-3a-((4-fluorophenyl)ethynyl)-2,6a-diphenyl-3a,6a-dihydrofuro[2,3-*b*]furan-3-carbonitrile (4b):** Purified using petroleum ether-ethyl acetate (5:1 v/v). White solid, mp 130–131 °C, 0.423 g, 80% yield.  $^1H$  NMR (600 MHz,  $CDCl_3$ )  $\delta$  7.90 (d,  $J$  = 7.0 Hz, 2H), 7.60 (d,  $J$  = 6.7 Hz, 2H), 7.39–7.23 (m, 11H), 6.75–6.64 (m, 4H);  $^{13}C$  NMR (100 MHz,  $CDCl_3$ )  $\delta$  192.0, 168.7, 165.2, 163.8, 161.3, 140.8, 134.2, 133.1 (d,  $J$  = 8.4 Hz), 132.4, 130.4, 129.9, 129.0, 128.4, 127.9, 127.5 (d,  $J$  = 9.0 Hz), 126.5, 126.2, 121.1, 117.9 (d,  $J$  = 3.4 Hz), 115.4 (d,  $J$  = 219.6 Hz), 114.7, 92.3, 91.1, 90.7, 85.0, 61.1; HRMS (ESI,  $m/z$ ): calcd. for  $C_{34}H_{21}FO_3N_2H^+$  525.1609, found 525.1606; IR (KBr thin film,  $cm^{-1}$ ):  $\nu$  3358, 2957, 2920, 2263, 2210, 1683, 1650, 1589, 1462, 1399, 1328, 1271, 1220, 1095, 1015, 932, 821, 764, 750, 688.

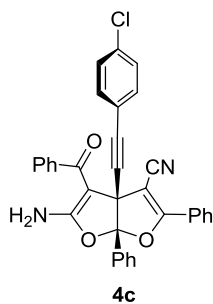

**5-amino-4-benzoyl-3a-((4-chlorophenyl)ethynyl)-6a-hydroxy-2-phenyl-3a,6a-**

**dihydrofuro[2,3-*b*]furan-3-carbonitrile (4c):** Purified using petroleum ether-ethyl acetate (5:1 v/v). White solid, mp 218–219 °C, 0.440 g, 82% yield.  $^1\text{H}$  NMR (400 MHz, DMSO- $\text{D}_6$ )  $\delta$  8.77 (s, 2H), 7.99 (d,  $J$  = 7.2 Hz, 2H), 7.69–7.56 (m, 10H), 7.44–7.33 (m, 5H), 6.80 (d,  $J$  = 8.3 Hz, 2H);  $^{13}\text{C}$  NMR (100 MHz, DMSO- $\text{D}_6$ )  $\delta$  189.3, 168.2, 165.3, 141.5, 134.2, 134.1, 133.3, 133.0, 131.0, 130.0, 129.9, 129.2, 129.0, 128.2, 127.6, 127.5, 126.5, 126.4, 120.5, 120.2, 115.3, 91.4, 90.2, 89.6, 87.1, 61.2; HRMS (ESI,  $m/z$ ): calcd. for  $\text{C}_{34}\text{H}_{21}\text{ClO}_3\text{N}_2\text{H}^+$  541.1313, found 541.1315; IR (KBr thin film,  $\text{cm}^{-1}$ ):  $\nu$  3299, 3063, 2924, 2289, 2216, 1650, 1497, 1465, 1277, 1100, 1024, 912, 835, 764, 753, 700.

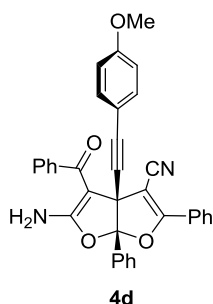

**5-amino-4-benzoyl-6a-hydroxy-3a-((4-methoxyphenyl)ethynyl)-2-phenyl-3a,6a-**

**dihydrofuro[2,3-*b*]furan-3-carbonitrile (4d):** Purified using petroleum ether-ethyl acetate (5:1 v/v). White solid, mp 218–219 °C, 0.405 g, 74% yield.  $^1\text{H}$  NMR (600 MHz,  $\text{CDCl}_3$ )  $\delta$  8.01 (d,  $J$  = 7.4 Hz, 2H), 7.75 (d,  $J$  = 7.2 Hz, 2H), 7.55–7.41 (m, 9H), 7.36 (t,  $J$  = 7.3 Hz, 2H), 6.76–6.68 (m, 4H), 3.75 (s, 3H);  $^{13}\text{C}$  NMR (100 MHz,  $\text{CDCl}_3$ )  $\delta$  192.1, 168.7, 165.1, 159.7, 140.9, 134.3, 132.7, 132.3, 130.3, 129.9, 129.0, 128.3, 127.9, 127.6, 127.6, 126.6, 126.3, 121.2, 114.7, 114.0, 113.7, 92.7, 91.8, 91.3, 84.0, 61.1, 55.3; HRMS (ESI,  $m/z$ ): calcd. for  $\text{C}_{35}\text{H}_{24}\text{O}_4\text{N}_2\text{H}^+$  537.1809, found 537.181; IR (KBr thin film,  $\text{cm}^{-1}$ ):  $\nu$  3308, 3069, 2928, 2307, 2219, 1718, 1659, 1605, 1464, 1249, 1180, 1032, 1180, 1032, 906, 835, 765, 698.

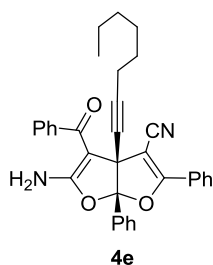

**5-amino-4-benzoyl-6a-hydroxy-3a-(oct-1-yn-1-yl)-2-phenyl-3a,6a-dihydrofuro[2,3-b]furan-3-carbonitrile (4e):** Purified using petroleum ether-ethyl acetate (5:1 v/v). Colourless liquid, 0.333 g, 64% yield.  $^1\text{H}$  NMR (400 MHz,  $\text{CDCl}_3$ )  $\delta$  7.83–7.80 (m, 2H), 7.53–7.50 (m, 2H), 7.34–7.16 (m, 11H), 1.59 (t,  $J = 6.5$  Hz, 2H), 1.09–0.99 (m, 2H), 0.95–0.74 (m, 6H), 0.68 (t,  $J = 7.3$  Hz, 3H);  $^{13}\text{C}$  NMR (150 MHz,  $\text{CDCl}_3$ )  $\delta$  192.0, 168.7, 164.8, 140.9, 134.3, 132.2, 130.2, 129.8, 129.0, 128.2, 127.7, 127.6, 126.8, 126.3, 121.2, 115.0, 93.5, 92.9, 91.9, 76.3, 60.7, 31.3, 28.3, 27.8, 22.5, 18.6, 14.2; HRMS (ESI,  $m/z$ ): calcd. for  $\text{C}_{34}\text{H}_{30}\text{O}_3\text{N}_2\text{H}^+$  515.2329, found 515.2326; IR (KBr thin film,  $\text{cm}^{-1}$ ):  $\nu$  3317, 3181, 2923, 2298, 2219, 1650, 1471, 1283, 1077, 1012, 764.

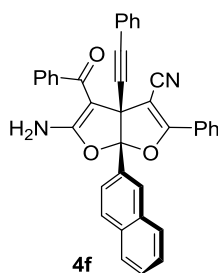

**5-amino-4-benzoyl-6a-(naphthalen-2-yl)-2-phenyl-3a-(phenylethynyl)-3a,6a-dihydrofuro[2,3-b]furan-3-carbonitrile (4f):** Purified using petroleum ether-ethyl acetate (5:1 v/v). White solid, mp 190–191  $^\circ\text{C}$ , 0.446 g, 80% yield.  $^1\text{H}$  NMR (600 MHz,  $\text{CDCl}_3$ )  $\delta$  8.07–8.02 (m, 3H), 7.92–7.88 (m, 3H), 7.76 (d,  $J = 7.3$  Hz, 2H), 7.59–7.34 (m, 9H), 7.11 (t,  $J = 7.4$  Hz, 1H), 6.99 (t,  $J = 7.6$  Hz, 2H), 6.55 (d,  $J = 7.5$  Hz, 2H);  $^{13}\text{C}$  NMR (150 MHz,  $\text{CDCl}_3$ )  $\delta$  192.2, 168.8, 165.3, 140.9, 134.1, 132.5, 132.5, 131.5, 131.2, 130.0, 129.1, 128.9, 128.5, 128.2, 128.0, 127.8, 127.7, 127.6, 127.5, 126.9, 126.7, 126.1, 123.4, 121.7, 121.3, 114.7, 92.6, 92.0, 91.4, 85.5, 61.3; HRMS (ESI,  $m/z$ ): calcd. for  $\text{C}_{38}\text{H}_{24}\text{O}_3\text{N}_2\text{Na}^+$  579.1679, found 579.1675; IR (KBr thin film,  $\text{cm}^{-1}$ ):  $\nu$  3311, 2921, 2304, 2225, 1650, 1463, 1274, 1194, 994, 765, 691.

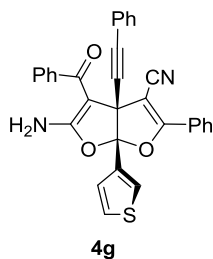

**5-amino-4-benzoyl-2-phenyl-3a-(phenylethynyl)-6a-(thiophen-3-yl)-3a,6a-**

**dihydrofuro[2,3-*b*]furan-3-carbonitrile (4g):** Purified using petroleum ether-ethyl acetate (5:1 v/v). White solid, mp 179–180 °C, 0.4032 g, 78% yield. <sup>1</sup>H NMR (600 MHz, CDCl<sub>3</sub>) δ 7.97 (d, *J* = 7.7 Hz, 2H), 7.75 (d, *J* = 7.4 Hz, 2H), 7.53–7.42 (m, 6H), 7.38 (t, *J* = 7.4 Hz, 2H), 7.29 (d, *J* = 3.0 Hz, 1H), 7.20 (t, *J* = 7.4 Hz, 2H), 7.15–7.10 (m, 1H), 6.98 (d, *J* = 7.4 Hz, 2H); <sup>13</sup>C NMR (150 MHz, CDCl<sub>3</sub>) δ 192.2, 168.0, 164.9, 140.8, 136.2, 131.5, 130.1, 129.0, 128.7, 128.2, 128.1, 127.8, 127.7, 127.5, 127.4, 126.5, 122.0, 120.0, 114.5, 92.2, 91.5, 91.1, 84.7; HRMS (ESI, *m/z*): calcd. for C<sub>32</sub>H<sub>20</sub>O<sub>3</sub>N<sub>2</sub>SH<sup>+</sup> 513.1267, found 513.1266; IR (KBr thin film, cm<sup>-1</sup>): ν 3317, 3066, 2925, 2301, 2216, 1653, 1492, 1458, 1257, 1411, 1257, 1079, 752, 690.

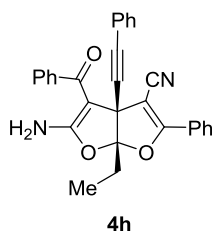

**5-amino-4-benzoyl-6a-ethyl-2-phenyl-3a-(phenylethynyl)-3a,6a-dihydrofuro[2,3-**

***b*]furan-3-carbonitrile (4h):** Purified using petroleum ether-ethyl acetate (5:1 v/v). White solid, mp 90–92 °C, 0.30 g, 66% yield. <sup>1</sup>H NMR (400 MHz, CDCl<sub>3</sub>) δ 7.82 (d, *J* = 7.3 Hz, 2H), 7.67–7.64 (m, 2H), 7.47–7.22 (m, 11H), 2.24 (q, *J* = 7.5 Hz, 2H), 1.18 (t, *J* = 7.4 Hz, 3H); <sup>13</sup>C NMR (150 MHz, CDCl<sub>3</sub>) δ 191.4, 168.6, 164.9, 141.1, 132.3, 131.7, 129.9, 129.0, 128.9, 128.5, 128.1, 127.5, 127.5, 126.9, 122.4, 122.1, 115.2, 93.0, 91.2, 90.2, 84.8, 57.7, 28.6, 7.1; HRMS (ESI, *m/z*): calcd. for C<sub>30</sub>H<sub>22</sub>O<sub>3</sub>N<sub>2</sub>H<sup>+</sup> 459.1703, found 459.1702; IR (KBr thin film, cm<sup>-1</sup>): ν 3202, 3125, 2921, 2292, 2219, 1653, 1507, 1456, 1259, 1094, 763, 750, 703.

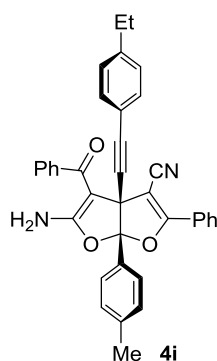

**5-amino-4-benzoyl-3a-((4-ethylphenyl)ethynyl)-2-phenyl-6a-(*p*-tolyl)-3a,6a-dihydrofuro[2,3-*b*]furan-3-carbonitrile (4I):** Purified using petroleum ether-ethyl acetate (5:1 v/v). White solid, mp 215–216 °C, 0.372 g, 76% yield.  $^1\text{H}$  NMR (400 MHz,  $\text{CDCl}_3$ )  $\delta$  8.01 (d,  $J$  = 5.1 Hz, 2H), 7.75 (d,  $J$  = 4.7 Hz, 2H), 7.51–7.38 (m, 8H), 7.27 (d,  $J$  = 7.7 Hz, 2H), 7.01 (d,  $J$  = 5.7 Hz, 2H), 6.75 (d,  $J$  = 5.7 Hz, 2H), 2.58 (d,  $J$  = 6.1 Hz, 2H), 2.42 (s, 3H), 1.18 (s, 3H);  $^{13}\text{C}$  NMR (150 MHz,  $\text{CDCl}_3$ )  $\delta$  192.2, 168.8, 165.2, 145.0, 140.9, 140.5, 131.4, 131.3, 131.3, 129.1, 129.0, 128.0, 127.7, 127.6, 127.6, 126.7, 126.2, 121.5, 119.2, 114.7, 92.8, 92.0, 91.3, 84.9, 61.1, 28.9, 15.4; HRMS (ESI,  $m/z$ ): calcd. for  $\text{C}_{37}\text{H}_{28}\text{O}_3\text{N}_2\text{H}^+$  549.2173, found 549.2171; IR (KBr thin film,  $\text{cm}^{-1}$ ):  $\nu$  3122, 2921, 2298, 2216, 1651, 1562, 1507, 1456, 1274, 1097, 763, 756, 703.

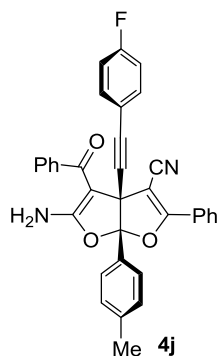

**5-amino-4-benzoyl-3a-((4-fluorophenyl)ethynyl)-2-phenyl-6a-(*p*-tolyl)-3a,6a-dihydrofuro[2,3-*b*]furan-3-carbonitrile (4J):** Purified using petroleum ether-ethyl acetate (5:1 v/v). White solid, mp 126–127 °C, 0.422 g, 78% yield.  $^1\text{H}$  NMR (400 MHz,  $\text{CDCl}_3$ )  $\delta$  8.01 (d,  $J$  = 8.2 Hz, 2H), 7.73–7.70 (m, 2H), 7.52–7.32 (m, 8H), 7.26 (d,  $J$  = 9.7 Hz, 2H), 6.89–6.75 (m, 4H), 2.40 (s, 3H);  $^{13}\text{C}$  NMR (100 MHz,  $\text{CDCl}_3$ )  $\delta$  191.9, 168.8, 165.2, 163.8, 161.3, 140.9, 140.5, 133.2 (d,  $J$  = 8.4 Hz), 132.4, 131.3, 129.9, 129.0, 127.9, 127.5 (d,  $J$  = 7.3 Hz), 126.6, 126.2, 121.3, 118.1 (d,  $J$  = 3.3 Hz), 115.5, 115.2, 114.8, 92.3, 91.1, 90.6, 85.2, 61.0, 21.3; HRMS (ESI,  $m/z$ ): calcd. for  $\text{C}_{35}\text{H}_{23}\text{FO}_3\text{N}_2\text{H}^+$  539.1765, found 539.1764; IR (KBr

thin film,  $\text{cm}^{-1}$ ):  $\nu$  3320, 2928, 2928, 2207, 1651, 1509, 1458, 1271, 1227, 1015, 1015, 844, 764, 750, 694.

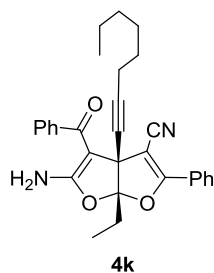

**5-amino-4-benzoyl-6a-ethyl-3a-(oct-1-yn-1-yl)-2-phenyl-3a,6a-dihydrofuro[2,3-b]furan-3-carbonitrile (4k):** Purified using petroleum ether-ethyl acetate (5:1 v/v). White solid, mp 126–127 °C, 0.368 g, 78% yield.  $^1\text{H}$  NMR (400 MHz,  $\text{CDCl}_3$ )  $\delta$  7.78 (d,  $J$  = 7.2 Hz, 2H), 7.61–7.58 (m, 2H), 7.38–7.29 (m, 6H), 2.14–2.07 (m, 2H), 2.03 (t,  $J$  = 7.0 Hz, 2H), 1.36–1.28 (m, 2H), 1.28–1.14 (m, 6H), 1.10 (t,  $J$  = 7.4 Hz, 3H), 0.79 (t,  $J$  = 6.8 Hz, 3H);  $^{13}\text{C}$  NMR (100 MHz,  $\text{CDCl}_3$ )  $\delta$  191.4, 168.3, 164.3, 141.1, 132.0, 129.5, 128.7, 127.7, 127.4, 127.4, 126.9, 122.3, 115.2, 93.2, 91.4, 77.4, 75.5, 57.2, 31.3, 28.6, 28.3, 28.2, 22.5, 18.9, 14.1, 6.9; HRMS (ESI,  $m/z$ ): calcd. for  $\text{C}_{30}\text{H}_{30}\text{O}_3\text{N}_2\text{H}^+$  467.2329, found 467.2328; IR (KBr thin film,  $\text{cm}^{-1}$ ):  $\nu$  3311, 3190, 2923, 2263, 2207, 1653, 1471, 1380, 1274, 1094, 912, 750, 694.

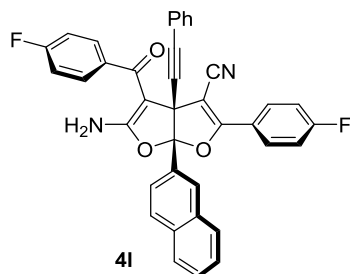

**5-amino-4-(4-fluorobenzoyl)-2-(4-fluorophenyl)-6a-(naphthalen-2-yl)-3a-(phenylethynyl)-3a,6a-dihydrofuro[2,3-b]furan-3-carbonitrile (4l):** Purified using petroleum ether-ethyl acetate (5:1 v/v). White solid, mp 145–146 °C, 0.490 g, 83% yield.  $^1\text{H}$  NMR (600 MHz,  $\text{CDCl}_3$ )  $\delta$  8.01–8.00 (m, 3H), 7.94–7.90 (m, 3H), 7.68 (d,  $J$  = 8.4 Hz, 2H), 7.61–7.52 (m, 3H), 7.48 (d,  $J$  = 8.6 Hz, 2H), 7.29 (d,  $J$  = 8.4 Hz, 2H), 7.14 (t,  $J$  = 7.5 Hz, 1H), 7.03 (t,  $J$  = 7.7 Hz, 2H), 6.51 (d,  $J$  = 7.4 Hz, 2H);  $^{13}\text{C}$  NMR (150 MHz,  $\text{CDCl}_3$ )  $\delta$  190.8, 169.0, 164.0, 139.1, 138.8, 136.0, 134.1, 132.5, 131.1, 129.5, 129.1, 129.0, 128.8, 128.7, 128.3, 128.1 (d,  $J$  = 6.4 Hz), 128.0, 127.7 (d,  $J$  = 17.9 Hz), 127.0, 126.0, 125.0, 123.2, 121.4 (d,  $J$  = 4.1 Hz), 114.7, 92.7, 92.2, 91.9, 84.9; HRMS (ESI,  $m/z$ ): calcd. for  $\text{C}_{38}\text{H}_{22}\text{F}_2\text{O}_3\text{N}_2\text{H}^+$  593.1671, found 593.1670; IR (KBr thin film,  $\text{cm}^{-1}$ ):  $\nu$  3309, 2950, 2330,

2235, 224, 11693, 1654, 1579, 1469, 1389, 1332, 1264, 1243, 1085, 1017, 935, 831, 754, 770, 678.

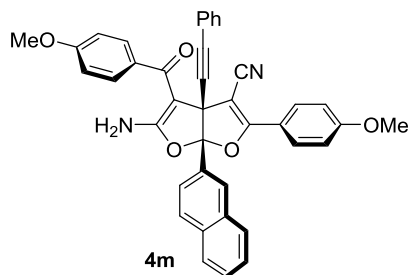

**5-amino-4-(4-methoxybenzoyl)-2-(4-methoxyphenyl)-6a-(naphthalen-2-yl)-3a-(phenylethynyl)-3a,6a-dihydrofuro[2,3-*b*]furan-3-carbonitrile (4m):**

Purified using petroleum ether-ethyl acetate (5:1 v/v). White solid, mp 215–216 °C, 0.44 g, 71% yield.  $^1\text{H}$  NMR (600 MHz,  $\text{CDCl}_3$ )  $\delta$  8.04 (d,  $J$  = 8.7 Hz, 3H), 7.91 (d,  $J$  = 7.7 Hz, 3H), 7.82 (d,  $J$  = 6.9 Hz, 2H), 7.58–7.54 (m, 3H), 7.12 (s, 1H), 7.00–6.96 (m, 4H), 6.86 (d,  $J$  = 6.8 Hz, 2H), 6.57 (d,  $J$  = 5.9 Hz, 2H), 3.85 (s, 3H), 3.77 (s, 3H);  $^{13}\text{C}$  NMR (150 MHz,  $\text{CDCl}_3$ )  $\delta$  191.4, 168.7, 165.2, 162.8, 161.3, 134.1, 133.7, 132.5, 131.8, 131.1, 129.7, 129.7, 128.9, 128.4, 128.1, 128.0, 127.7, 127.5, 126.8, 126.1, 123.6, 121.9, 120.9, 119.2, 115.5, 114.4, 113.2, 92.6, 91.9, 89.2, 86.1, 61.3, 55.6, 55.3; HRMS (ESI,  $m/z$ ): calcd. for  $\text{C}_{40}\text{H}_{28}\text{O}_5\text{N}_2\text{H}^+$  617.2071, found 617.2069; IR (KBr thin film,  $\text{cm}^{-1}$ ):  $\nu$  3315, 2931, 2319, 2215, 1653, 1442, 1264, 1020, 828, 774, 760, 684.

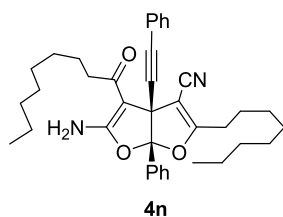

**(3a*S*,6a*R*)-5-amino-4-nonanoyl-2-octyl-6a-phenyl-3a-(phenylethynyl)-3a,6a-dihydrofuro[2,3-*b*]furan-3-carbonitrile (4n):** Purified using petroleum ether-ethyl acetate (5:1 v/v). Colourless liquid, 0.477 g, 89% yield.  $^1\text{H}$  NMR (400 MHz,  $\text{CDCl}_3$ )  $\delta$  7.47–7.39 (m, 5H), 7.23–7.15 (m, 3H), 6.90 (d,  $J$  = 7.1 Hz, 2H), 3.03–2.94 (m, 1H), 2.76–2.68 (m, 1H), 2.63–2.51 (m, 2H), 1.78–1.62 (m, 4H), 1.44–1.18 (m, 20H), 0.89–0.81 (m, 6H);  $^{13}\text{C}$  NMR (100 MHz,  $\text{CDCl}_3$ )  $\delta$  196.2, 172.3, 166.9, 134.5, 131.2, 130.2, 128.6, 128.3, 128.1, 125.9, 121.9, 121.4, 114.9, 93.8, 91.6, 91.1, 84.3, 60.3, 39.6, 31.9, 31.8, 29.7, 29.6, 29.3, 29.1, 29.0, 28.1, 26.2, 25.1, 22.7, 22.7, 14.1, 14.1; HRMS (ESI,  $m/z$ ): calcd. for  $\text{C}_{38}\text{H}_{46}\text{O}_3\text{N}_2\text{H}^+$

579.3581, found 579.3579; IR (KBr thin film,  $\text{cm}^{-1}$ ):  $\nu$  3340, 2922, 2295, 2219, 1659, 1490, 1464, 1271, 1015, 1100, 918, 838, 759, 697.

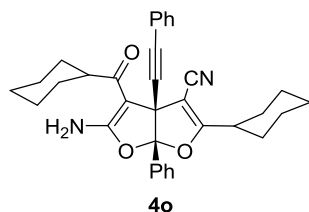

**5-amino-4-(cyclohexanecarbonyl)-2-cyclohexyl-6a-phenyl-3a-(phenylethynyl)-3a,6a-dihydrofuro[2,3-*b*]furan-3-carbonitrile (4o):** Purified using petroleum ether-ethyl acetate (5:1 v/v). Colourless liquid, 0.402 g, 77% yield.  $^1\text{H}$  NMR (400 MHz,  $\text{CDCl}_3$ )  $\delta$  7.47–7.37 (m, 5H), 7.25–7.14 (m, 3H), 6.88–6.85 (m, 2H), 3.18–3.12 (m, 1H), 2.73–2.62 (m, 1H), 2.03 (d,  $J = 12.3$  Hz, 1H), 1.91–1.22 (m, 19H);  $^{13}\text{C}$  NMR (100 MHz,  $\text{CDCl}_3$ )  $\delta$  199.8, 175.7, 167.5, 134.7, 131.2, 130.2, 128.5, 128.3, 128.1, 125.9, 121.9, 121.2, 114.5, 91.7, 91.4, 90.3, 84.5, 60.1, 46.9, 38.1, 30.0, 29.6, 29.4, 29.0, 26.1, 25.8, 25.5, 25.5, 25.4, 25.1; HRMS (ESI,  $m/z$ ): calcd. for  $\text{C}_{34}\text{H}_{34}\text{O}_3\text{N}_2\text{H}^+$  519.2642, found 519.2638; IR (KBr thin film,  $\text{cm}^{-1}$ ):  $\nu$  3358, 2930, 2298, 2222, 1665, 1479, 1268, 1191, 1032, 962, 757, 697.

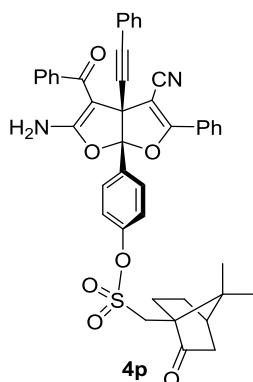

**4-(2-amino-3-benzoyl-4-cyano-5-phenyl-3a-(phenylethynyl)-3a,6a-dihydrofuro[2,3-*b*]furan-6a-yl)phenyl((1*R*)-7,7-dimethyl-2-oxobicyclo[2.2.1]heptan-1-yl)methanesulfonate (4p):** Purified using petroleum ether-ethyl acetate (5:1 v/v). Colourless liquid, 0.589 g, 80% yield.  $^1\text{H}$  NMR (600 MHz,  $\text{CDCl}_3$ )  $\delta$  7.99 (d,  $J = 7.5$  Hz, 2H), 7.73 (d,  $J = 7.2$  Hz, 2H), 7.57 (d,  $J = 8.7$  Hz, 2H), 7.54–7.50 (m, 1H), 7.48–7.41 (m, 5H), 7.38–7.34 (m, 2H), 7.25–7.16 (m, 3H), 6.86 (d,  $J = 7.7$  Hz, 2H), 3.82 (d,  $J = 15.0$  Hz, 1H), 3.20 (dd,  $J = 15.0, 3.2$  Hz, 1H), 2.55–2.49 (m, 1H), 2.44–2.38 (m, 1H), 2.17–2.13 (m, 1H), 2.09–2.06 (m, 1H), 1.97 (d,  $J = 18.5$  Hz, 1H), 1.74–1.69 (m, 1H), 1.48–1.40 (m, 1H), 1.13 (d,  $J = 2.5$  Hz, 3H), 0.87 (d,  $J = 1.8$  Hz, 3H);  $^{13}\text{C}$  NMR (150 MHz,  $\text{CDCl}_3$ )  $\delta$  214.1, 192.1, 168.5, 165.0,



150.5, 140.8, 133.3, 132.5, 131.4, 130.1, 129.1, 128.8, 128.3, 128.0, 127.6, 127.6, 126.4, 122.2, 121.6, 121.5, 120.6, 114.5, 92.4, 91.3, 85.0, 61.2, 58.2, 48.2, 48.1, 42.9, 42.5, 31.0, 27.0, 25.2, 20.0, 19.8; HRMS (ESI,  $m/z$ ): calcd. for  $C_{44}H_{36}O_7N_2SH^+$  737.2316, found 737.2318; IR (KBr thin film,  $cm^{-1}$ ):  $\nu$  3328, 3140, 2963, 2287, 2213, 1747, 1651, 1507, 1457, 1384, 1259, 1156, 1015, 870, 759, 703.

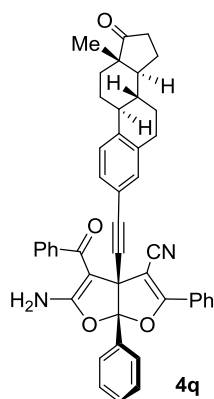

**5-amino-4-benzoyl-3a-(((8*R*,9*S*,13*S*,14*S*)-13-methyl-17-oxo-7,8,9,11,12,13,14,15,16,17-decahydro-6*H*-cyclopenta[*a*]phenanthren-3-yl)ethynyl)-2,6a-diphenyl-3a,6a-dihydrofuro[2,3-*b*]furan-3-carbonitrile (4q):** Purified using petroleum ether-ethyl acetate (5:1 v/v). Colour less liquid, 0.553 g, 81% yield.  $^1H$  NMR (400 MHz,  $CDCl_3$ )  $\delta$  8.02 (d,  $J$  = 7.5 Hz, 2H), 7.76 (d,  $J$  = 7.3 Hz, 2H), 7.54–7.36 (m, 9H), 7.38 (t,  $J$  = 7.3 Hz, 2H), 7.09 (d,  $J$  = 8.0 Hz, 1H), 6.59 (d,  $J$  = 9.3 Hz, 2H), 2.78 (d,  $J$  = 4.7 Hz, 2H), 2.54–2.46 (m, 1H), 2.34 (d,  $J$  = 5.5 Hz, 1H), 2.26–1.93 (m, 5H), 1.58–1.37 (m, 5H), 1.26 (s, 1H), 0.89 (s, 3H);  $^{13}C$  NMR (150 MHz,  $CDCl_3$ )  $\delta$  220.9, 192.1, 168.8, 165.2, 140.9, 140.6, 136.4, 134.3, 132.4, 131.9, 130.3, 130.0, 129.0, 128.5, 128.4, 128.0, 127.6, 127.6, 126.7, 126.3, 125.1, 121.2, 119.3, 114.7, 92.7, 92.0, 91.3, 84.8, 61.2, 50.5, 48.0, 44.4, 37.9, 35.9, 31.6, 29.1, 26.3, 25.6, 21.6, 13.9; HRMS (ESI,  $m/z$ ): calcd. for  $C_{46}H_{37}O_4N_2NaH^+$  705.2738, found 705.2733; IR (KBr thin film,  $cm^{-1}$ ):  $\nu$  3352, 3193, 2922, 2289, 2213, 1733, 1651, 1453, 1277, 1256, 1088, 764, 750, 694.

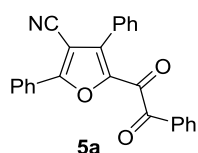

**5-(2-oxo-2-phenylacetyl)-2,4-diphenylfuran-3-carbonitrile (5a):** Purified using petroleum ether-ethyl acetate (5:1 v/v). Yellow solid, mp 126–127 °C, 0.340 g, 79% yield.  $^1H$  NMR (400 MHz,  $CDCl_3$ )  $\delta$  8.12–8.09 (m, 2H), 7.86 (d,  $J$  = 7.4 Hz, 4H), 7.65 (t,  $J$  = 7.4 Hz, 2H),

7.57–7.42 (m, 8H), 7.38 (t,  $J = 7.3$  Hz, 2H);  $^{13}\text{C}$  NMR (100 MHz,  $\text{CDCl}_3$ )  $\delta$  191.1, 181.9, 162.9, 143.9, 139.6, 135.0, 132.3, 130.4, 129.8, 129.6, 129.4, 129.0, 128.7, 127.0, 126.7, 126.4, 113.1, 96.4; HRMS (ESI,  $m/z$ ): calcd. for  $\text{C}_{25}\text{H}_{15}\text{O}_3\text{NNa}^+$  400.0944, found 400.0941; IR (KBr thin film,  $\text{cm}^{-1}$ ):  $\nu$  3061, 2922, 2227, 1671, 1652, 1479, 1230, 862.

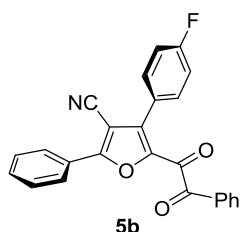

**4-(4-fluorophenyl)-5-(2-oxo-2-phenylacetyl)-2-phenylfuran-3-carbonitrile (5b):** Purified using petroleum ether-ethyl acetate (5:1 v/v). Yellow solid, mp 140–141 °C, 0.312 g, 79% yield.  $^1\text{H}$ NMR (600 MHz,  $\text{CDCl}_3$ )  $\delta$  8.05 (d,  $J = 8.7$  Hz, 2H), 7.88–7.84 (m, 2H), 7.67–7.63 (m, 1H), 7.52–7.43 (m, 7H), 7.38–7.36 (m, 2H);  $^{13}\text{C}$ NMR (150 MHz,  $\text{CDCl}_3$ )  $\delta$  191.1, 181.9, 161.7, 144.1, 139.6, 138.7, 135.1, 132.4, 130.6, 130.0, 129.8, 129.7, 129.1, 128.8, 128.0, 126.9, 125.0, 113.0, 96.8; HRMS (ESI,  $m/z$ ): calcd. for  $\text{C}_{25}\text{H}_{14}\text{O}_3\text{NFNa}^+$  418.0850, found 418.0851; IR (KBr thin film,  $\text{cm}^{-1}$ ):  $\nu$  2981, 2212, 1681, 1625, 1525, 1421, 1375, 1238, 1084, 870, 621.

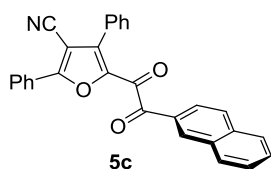

**5-(2-(naphthalen-2-yl)-2-oxoacetyl)-2,4-diphenylfuran-3-carbonitrile (5c):** Purified using petroleum ether-ethyl acetate (5:1 v/v). Yellow solid, mp 181–182 °C, 0.337 g, 79% yield.  $^1\text{H}$  NMR (600 MHz,  $\text{CDCl}_3$ )  $\delta$  8.40 (s, 1H), 8.12 (d,  $J = 7.1$  Hz, 2H), 7.95–7.89 (m, 4H), 7.66 (t,  $J = 7.7$  Hz, 1H), 7.58 (d,  $J = 7.5$  Hz, 1H), 7.57–7.51 (m, 5H), 7.44 (t,  $J = 7.3$  Hz, 1H), 7.37 (t,  $J = 7.5$  Hz, 2H);  $^{13}\text{C}$  NMR (150 MHz,  $\text{CDCl}_3$ )  $\delta$  191.3, 182.1, 163.0, 144.1, 139.8, 136.5, 133.4, 132.4, 132.3, 130.5, 130.1, 129.8, 129.7, 129.5, 129.3, 128.8, 128.1, 127.4, 127.2, 126.9, 126.6, 123.7, 113.3, 96.5; HRMS (ESI,  $m/z$ ): calcd. for  $\text{C}_{29}\text{H}_{17}\text{O}_3\text{NNa}^+$  450.1100, found 450.1101; IR (KBr thin film,  $\text{cm}^{-1}$ ):  $\nu$  3061, 2921, 2233, 1698, 1671, 1558, 1448, 1400, 1268, 719, 770.

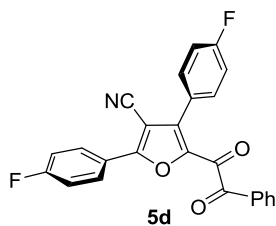

**2,4-bis(4-fluorophenyl)-5-(2-oxo-2-phenylacetyl)furan-3-carbonitrile (5d):** Purified using petroleum ether-ethyl acetate (5:1 v/v). Yellow solid, mp 174–175 °C, 0.3102 g, 77% yield.  $^1\text{H}$  NMR (600 MHz,  $\text{CDCl}_3$ )  $\delta$  8.03 (d,  $J$  = 8.6 Hz, 2H), 7.88 (d,  $J$  = 7.6 Hz, 2H), 7.68 (t,  $J$  = 7.4 Hz, 1H), 7.54–7.49 (m, 6H), 7.10 (t,  $J$  = 8.5 Hz, 2H);  $^{13}\text{C}$  NMR (150 MHz,  $\text{CDCl}_3$ )  $\delta$  191.1, 181.8, 164.8, 163.1, 161.7, 144.1, 138.8, 138.5, 135.3, 132.2, 131.8 (d,  $J$  = 8.8 Hz), 129.9 (d,  $J$  = 6.2 Hz), 129.2, 128.0, 124.9, 122.9, 116.1 (d,  $J$  = 21.8 Hz), 112.9, 96.7; HRMS (ESI,  $m/z$ ): calcd. for  $\text{C}_{25}\text{H}_{13}\text{F}_2\text{O}_3\text{NNa}^+$  436.0756, found 436.0759; IR (KBr thin film,  $\text{cm}^{-1}$ ):  $\nu$  2916, 2232, 1671, 1645, 1505, 1420, 1385, 1238, 1094, 860, 611.

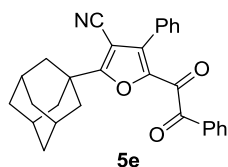

**2-((1S, 3S)-adamantan-1-yl)-5-(2-oxo-2-phenylacetyl)-4-phenylfuran-3-carbonitrile (5e):** Purified using petroleum ether-ethyl acetate (5:1 v/v). Pale yellow solid, mp 117–118 °C, 0.347 g, 78% yield.  $^1\text{H}$  NMR (600 MHz,  $\text{CDCl}_3$ )  $\delta$  7.81–7.78 (m, 2H), 7.62 (t,  $J$  = 7.4 Hz, 1H), 7.45 (t,  $J$  = 7.8 Hz, 2H), 7.41–7.35 (m, 3H), 7.30 (t,  $J$  = 7.6 Hz, 2H), 2.14–2.10 (m, 9H), 1.77 (s, 6H);  $^{13}\text{C}$  NMR (150 MHz,  $\text{CDCl}_3$ )  $\delta$  191.4, 182.0, 175.6, 143.3, 139.2, 134.9, 132.5, 130.2, 129.8, 129.7, 129.0, 128.6, 127.4, 112.9, 96.1, 39.8, 37.7, 36.1, 27.8; HRMS (ESI,  $m/z$ ): calcd. for  $\text{C}_{29}\text{H}_{25}\text{O}_3\text{NNa}^+$  458.1727, found 458.1728; IR (KBr thin film,  $\text{cm}^{-1}$ ):  $\nu$  2922, 2851, 2233, 1682, 1670, 1518, 1450, 1391, 1262, 882.

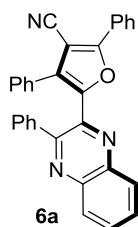

**2,4-diphenyl-5-(3-phenylquinoxalin-2-yl)furan-3-carbonitrile (6a):** Purified using petroleum ether-ethyl acetate (10:1 v/v). Yellow solid, mp 198–199 °C, 0.348 g, 78% yield.  $^1\text{H}$  NMR (400 MHz,  $\text{CDCl}_3$ )  $\delta$  8.15 (t,  $J$  = 7.1 Hz, 2H), 7.92 (d,  $J$  = 3.8 Hz, 2H), 7.82 (s, 2H),

7.46 (s, 3H), 7.30–7.19 (m, 8H), 7.11 (d,  $J = 7.0$  Hz, 2H);  $^{13}\text{C}$  NMR (100 MHz,  $\text{CDCl}_3$ )  $\delta$  160.3, 153.9, 146.3, 142.7, 141.7, 140.9, 138.1, 131.3, 130.7, 130.5, 129.4, 129.4, 129.2, 129.1, 128.9, 128.9, 128.7, 127.6, 125.9, 114.5, 94.2; HRMS (ESI,  $m/z$ ): calcd. for  $\text{C}_{31}\text{H}_{19}\text{ON}_3\text{H}^+$  450.1601, found 450.1604; IR (KBr thin film,  $\text{cm}^{-1}$ ):  $\nu$  2919, 2227, 1647, 1542, 1380, 1380, 1097, 767.

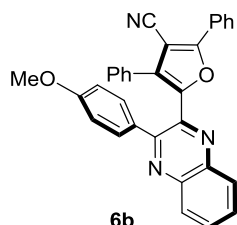

**5-(3-(4-methoxyphenyl)quinoxalin-2-yl)-2,4-diphenylfuran-3-carbonitrile (6b):** Purified using petroleum ether-ethyl acetate (10:1 v/v). Yellow solid, mp 166–167 °C, 0.359 g, 75% yield.  $^1\text{H}$  NMR (400 MHz,  $\text{CDCl}_3$ )  $\delta$  8.18–8.13 (m, 2H), 7.91–7.88 (m, 2H), 7.84–7.79 (m, 2H), 7.46 (d,  $J = 3.6$  Hz, 3H), 7.33–7.26 (m, 5H), 7.07 (d,  $J = 8.6$  Hz, 2H), 6.76 (d,  $J = 8.6$  Hz, 2H), 3.80 (s, 3H);  $^{13}\text{C}$  NMR (100 MHz,  $\text{CDCl}_3$ )  $\delta$  160.2, 159.9, 153.9, 145.9, 142.9, 141.6, 140.9, 138.2, 131.2, 130.6, 130.5, 130.0, 129.4, 129.3, 129.1, 128.9, 128.3, 127.7, 125.8, 121.2, 114.6, 114.1, 94.3, 55.4; HRMS (ESI,  $m/z$ ): calcd. for  $\text{C}_{32}\text{H}_{21}\text{O}_2\text{N}_3\text{H}^+$  480.1707, found 480.1710; IR (KBr thin film,  $\text{cm}^{-1}$ ):  $\nu$  3058, 2940, 2227, 1612, 1511, 1253, 1100, 1177, 1029, 770, 697.

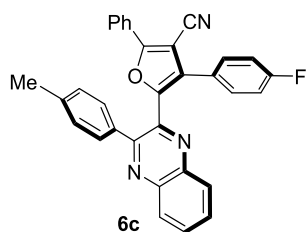

**4-(4-fluorophenyl)-2-phenyl-5-(3-(p-tolyl)quinoxalin-2-yl)furan-3-carbonitrile (6c):** Purified using petroleum ether-ethyl acetate (10:1 v/v). Yellow solid, mp 178–179 °C, 0.356 g, 74% yield.  $^1\text{H}$  NMR (400 MHz,  $\text{CDCl}_3$ )  $\delta$  8.16–8.10 (m, 2H), 7.91–7.89 (m, 2H), 7.84–7.77 (m, 2H), 7.47 (d,  $J = 4.6$  Hz, 3H), 7.18–7.06 (m, 6H), 6.92 (t,  $J = 8.4$  Hz, 2H), 2.35 (s, 3H);  $^{13}\text{C}$  NMR (100 MHz,  $\text{CDCl}_3$ )  $\delta$  164.1, 161.6, 160.3, 153.8, 146.5, 142.5, 141.7, 140.7, 139.1, 135.2, 131.2, 130.8, 130.6 (d,  $J = 8.4$  Hz), 130.4, 129.3 (d,  $J = 10.7$  Hz), 129.1 (d,  $J = 3.7$  Hz), 128.4, 128.0, 127.6, 125.9, 125.0 (d,  $J = 3.3$  Hz), 115.7, 115.5, 114.4, 94.1, 21.3; HRMS (ESI,  $m/z$ ): calcd. for  $\text{C}_{32}\text{H}_{20}\text{OFN}_3\text{Na}^+$  504.1483, found 504.1481; IR (KBr thin film,  $\text{cm}^{-1}$ ):  $\nu$  3061, 2916, 2227, 1609, 1509, 1231, 1103, 947, 840, 765, 685.

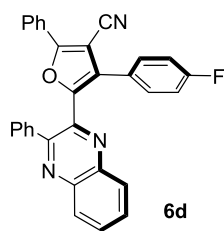

**4-(4-fluorophenyl)-2-phenyl-5-(3-phenylquinoxalin-2-yl)furan-3-carbonitrile (6d):**

Purified using petroleum ether-ethyl acetate (10:1 v/v). Yellow solid, mp 166–167 °C, 0.372 g, 80% yield.  $^1\text{H}$  NMR (600 MHz,  $\text{CDCl}_3$ )  $\delta$  8.17– 8.11 (m, 2H), 7.91–7.88 (m, 2H), 7.84–7.78 (m, 2H), 7.49–7.42 (m, 3H), 7.34–7.24 (m, 5H), 7.12–7.08 (m, 2H), 6.96–6.88 (m, 2H);  $^{13}\text{C}$  NMR (150 MHz,  $\text{CDCl}_3$ )  $\delta$  163.8, 162.1, 160.4, 153.8, 146.4, 142.5, 141.8, 140.9, 138.2, 131.4, 130.9, 130.6 (d,  $J = 30$  Hz), 129.5, 129.4, 129.2, 129.1, 128.5 (d,  $J = 2.4$  Hz), 128.3, 127.6, 125.9, 125.1, 115.9, 115.7, 114.4, 94.2; HRMS (ESI,  $m/z$ ): calcd. for  $\text{C}_{31}\text{H}_{18}\text{OFN}_3\text{Na}^+$  490.1326, found 490.1324; IR (KBr thin film,  $\text{cm}^{-1}$ ):  $\nu$  3069, 2925, 2225, 1553, 1509, 1341, 1221, 1091, 844, 773, 697, 573.

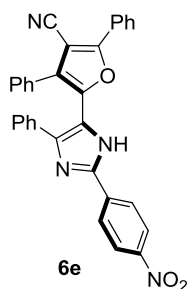

**5-(2-(4-nitrophenyl)-4-phenyl-1H-imidazol-5-yl)-2,4-diphenylfuran-3-carbonitrile (6e):**

Purified using petroleum ether-ethyl acetate (10:1 v/v). Yellow solid, mp 181–182 °C, 0.418 g, 83% yield.  $^1\text{H}$  NMR (400 MHz,  $\text{DMSO}-d_6$ )  $\delta$  13.46 (s, 1H), 8.38–8.26 (m, 4H), 7.86 (s, 2H), 7.57–7.34 (m, 13H);  $^{13}\text{C}$  NMR (150 MHz,  $\text{DMSO}-d_6$ )  $\delta$  158.6, 147.5, 145.4, 144.9, 136.0, 134.6, 131.1, 130.0, 129.8, 129.4, 129.1, 129.0, 128.8, 128.3, 127.8, 126.6, 125.5, 125.4, 124.9, 115.1, 94.1; HRMS (ESI,  $m/z$ ): calcd. for  $\text{C}_{32}\text{H}_{20}\text{O}_3\text{N}_4\text{Na}^+$  531.1428, found 531.1429; IR (KBr thin film,  $\text{cm}^{-1}$ ):  $\nu$  3647, 2922, 2849, 2225, 1639, 1508, 1339, 1256, 853, 767, 695.

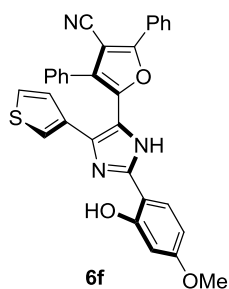

**5-(2-(2-hydroxy-4-methoxyphenyl)-4-(thiophen-3-yl)-1H-imidazol-5-yl)-2,4-**

**diphenylfuran-3-carbonitrile (6f):** Purified using petroleum ether-ethyl acetate (10:1 v/v).

Yellow solid, mp 290–291 °C, 0.417 g, 81% yield.  $^1\text{H}$  NMR (600 MHz, DMSO- $\text{D}_6$ )  $\delta$  12.28 (s, 0.33H), 11.76 (s, 0.47H), 8.05–6.88 (m, 14H), 6.54–6.43 (m, 2H), 3.75–3.71 (m, 3H);  $^{13}\text{C}$  NMR (150 MHz, DMSO- $\text{D}_6$ )  $\delta$  162.1, 161.9, 160.6, 158.8, 158.8, 158.7, 148.1, 147.5, 143.9, 139.9, 135.3, 135.1, 131.7, 131.2, 130.2, 130.1, 130.0, 129.8, 129.5, 129.4, 129.3, 129.2, 129.1, 128.8, 128.4, 128.3, 128.2, 128.1, 127.7, 127.6, 127.1, 127.0, 126.2, 126.0, 125.6, 125.3, 124.6, 124.4, 115.0, 112.7, 107.0, 106.7, 106.5, 106.2, 106.0, 102.0, 101.9, 94.6, 93.8, 55.8; HRMS (ESI,  $m/z$ ): calcd. for  $\text{C}_{31}\text{H}_{21}\text{O}_3\text{N}_3\text{SH}^+$  516.1376, found 516.1378; IR (KBr thin film,  $\text{cm}^{-1}$ ):  $\nu$  3350, 2215, 1525, 1505, 1450, 1356, 1327, 1215, 879, 721, 721, 657.

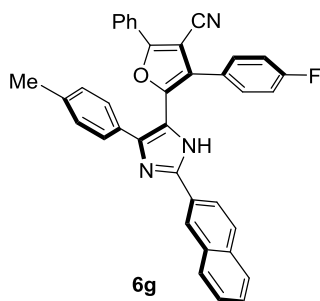

**4-(4-fluorophenyl)-5-(2-(naphthalen-2-yl)-4-(p-tolyl)-1H-imidazol-5-yl)-2-phenylfuran-**

**3-carbonitrile (6g):** Purified using petroleum ether-ethyl acetate (10:1 v/v). Yellow solid, mp

287–288 °C, 0.425 g, 78% yield.  $^1\text{H}$  NMR (400 MHz, DMSO- $\text{D}_6$ )  $\delta$  13.10 (s, 1H), 8.77 (d,  $J$  = 8.5 Hz, 1H), 8.02–7.97 (m, 3H), 7.77–7.68 (m, 3H), 7.65–7.44 (m, 9H), 7.34 (t,  $J$  = 8.6 Hz, 2H), 7.28 (d,  $J$  = 7.6 Hz, 2H), 2.38 (s, 3H);  $^{13}\text{C}$  NMR (150 MHz, DMSO- $\text{D}_6$ )  $\delta$  163.3, 161.7, 157.8, 146.6, 146.4, 138.2, 134.1, 132.7, 132.1 (d,  $J$  = 9.7 Hz), 131.0, 130.6, 129.9 (d,  $J$  = 7.1 Hz), 129.6, 128.8, 128.5 (d,  $J$  = 2.7 Hz), 128.4, 127.9, 127.4, 127.2, 127.1, 127.0, 126.9, 126.7, 125.7, 125.4, 123.4, 115.9 (d,  $J$  = 90 Hz), 115.1, 94.5, 21.3; HRMS (ESI,  $m/z$ ): calcd. for  $\text{C}_{37}\text{H}_{24}\text{FON}_3\text{Na}^+$  568.1796, found 568.1793; IR (KBr thin film,  $\text{cm}^{-1}$ ):  $\nu$  3317, 2916, 2224, 1642, 1548, 1506, 1383, 1230, 1159, 935, 853, 770, 691, 588.

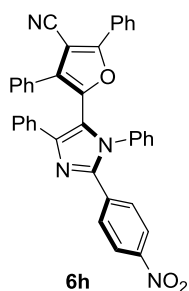

**5-(2-(4-nitrophenyl)-1,4-diphenyl-1H-imidazol-5-yl)-2,4-diphenylfuran-3-carbonitrile**

**(6h):** Purified using petroleum ether-ethyl acetate (10:1 v/v). Yellow solid, mp 117–118 °C, 0.452 g, 77% yield.  $^1\text{H}$  NMR (400 MHz,  $\text{CDCl}_3$ )  $\delta$  8.08 (d,  $J$  = 8.9 Hz, 2H), 7.98–7.94 (m, 2H), 7.75 (d,  $J$  = 7.1 Hz, 2H), 7.61 (d,  $J$  = 8.9 Hz, 2H), 7.52–7.47 (m, 3H), 7.39–7.29 (m, 4H), 7.26–7.19 (m, 5H), 7.07 (d,  $J$  = 6.6 Hz, 2H), 6.78 (s, 2H);  $^{13}\text{C}$  NMR (150 MHz,  $\text{CDCl}_3$ )  $\delta$  161.0, 147.5, 145.9, 144.9, 138.9, 135.8, 135.6, 132.8, 130.9, 130.3, 129.7, 129.5, 129.3, 128.9, 128.8, 128.3, 128.0, 127.7, 127.2, 126.6, 125.7, 123.6, 120.1, 114.5, 93.5; HRMS (ESI,  $m/z$ ): calcd. for  $\text{C}_{38}\text{H}_{24}\text{O}_3\text{N}_4\text{H}^+$  585.1921, found 585.1920; IR (KBr thin film,  $\text{cm}^{-1}$ ):  $\nu$  2922, 2227, 1595, 1527, 1508, 1496, 1386, 1347, 1265, 859, 765, 753, 692.

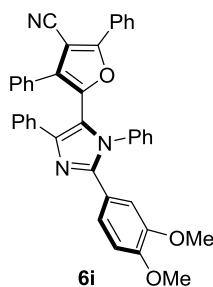

**5-(2-(3,4-dimethoxyphenyl)-1,4-diphenyl-1H-imidazol-5-yl)-2,4-diphenylfuran-3-carbonitrile**

**(6i):** Purified using petroleum ether-ethyl acetate (10:1 v/v). Yellow solid, mp 244–245 °C, 0.482 g, 81% yield.  $^1\text{H}$  NMR (400 MHz,  $\text{CDCl}_3$ )  $\delta$  7.87 (d,  $J$  = 6.6 Hz, 2H), 7.44–7.37 (m, 5H), 7.30–7.23 (m, 6H), 7.17–7.13 (m, 1H), 7.08–7.05 (m, 4H), 6.94 (s, 1H), 6.86 (d,  $J$  = 7.6 Hz, 3H), 6.69 (d,  $J$  = 8.4 Hz, 1H), 3.83 (s, 3H), 3.63 (s, 3H);  $^{13}\text{C}$  NMR (100 MHz,  $\text{CDCl}_3$ )  $\delta$  158.8, 149.4, 148.4, 147.4, 144.8, 137.0, 134.5, 130.4, 130.1, 129.9, 129.4, 129.3, 129.1, 128.9, 128.7, 128.5, 128.2, 128.1, 128.0, 127.9, 127.8, 125.6, 125.5, 122.6, 121.4, 115.1, 111.8, 110.6, 94.1, 55.8, 55.6; HRMS (ESI,  $m/z$ ): calcd. for  $\text{C}_{40}\text{H}_{29}\text{O}_3\text{N}_3\text{H}^+$  600.2282, found 600.2285; IR (KBr thin film,  $\text{cm}^{-1}$ ):  $\nu$  3069, 2925, 2225, 1524, 1492, 1442, 1256, 1229, 1147, 1021, 1021, 935, 935, 850, 765, 765, 691.

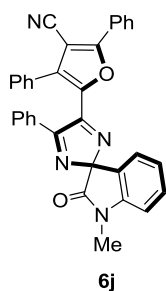

**5-(1'-methyl-2'-oxo-4-phenylspiro[imidazole-2,3'-indolin]-5-yl)-2,4-diphenylfuran-3-carbonitrile (**6j**):** Purified using petroleum ether-ethyl acetate (10:1 v/v). White solid, mp 258–259 °C, 0.429 g, 83% yield. <sup>1</sup>H NMR (600 MHz, DMSO–D<sub>6</sub>) δ 8.32 (d, *J* = 7.7 Hz, 1H), 8.00 (d, *J* = 8.0 Hz, 2H), 7.69 (t, *J* = 7.7 Hz, 1H), 7.61–7.49 (m, 6H), 7.42 (t, *J* = 7.4 Hz, 1H), 7.33–7.20 (m, 8H), 3.60 (s, 3H); <sup>13</sup>C NMR (100 MHz, DMSO–D<sub>6</sub>) δ 160.3, 145.8, 145.2, 140.3, 137.6, 132.4, 132.2, 131.5, 130.1, 129.3, 129.3, 129.2, 129.1, 129.1, 129.1, 128.2, 127.7, 127.2, 125.9, 124.3, 124.2, 116.1, 115.0, 113.1, 111.6, 93.2, 31.4; HRMS (ESI, *m/z*): calcd. for C<sub>34</sub>H<sub>22</sub>O<sub>2</sub>N<sub>4</sub>H<sup>+</sup> 519.1816, found 519.1819; IR (KBr thin film, cm<sup>−1</sup>): ν 2922, 2852, 2227, 1712, 1656, 1598, 1559, 1484, 1484, 1344, 1321, 750.

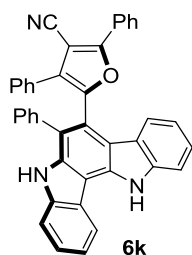

**2,4-diphenyl-5-(6-phenyl-5,12-dihydroindolo[3,2-*a*]carbazol-7-yl)furan-3-carbonitrile (**6k**):** Purified using petroleum ether-ethyl acetate (5:1 v/v). White solid, mp 116–117 °C, 0.414 g, 72% yield. <sup>1</sup>H NMR (600 MHz, DMSO–D<sub>6</sub>) δ 12.08 (s, 1H), 11.51 (s, 1H), 8.75–8.69 (m, 1H), 7.94–7.87 (m, 2H), 7.65–7.08 (m, 17H), 6.83–6.59 (m, 3H); <sup>13</sup>C NMR (100 MHz, DMSO–D<sub>6</sub>) δ 159.6, 147.6, 140.4, 139.6, 139.5, 139.1, 136.8, 135.3, 130.9, 130.2, 129.9, 129.0, 128.5, 128.2, 128.2, 127.9, 126.7, 125.6, 125.1, 124.4, 123.7, 121.8, 121.6, 120.6, 119.7, 119.5, 115.5, 113.9, 111.7, 111.6, 106.1, 104.0, 92.7; HRMS (ESI, *m/z*): calcd. for C<sub>41</sub>H<sub>25</sub>ON<sub>3</sub>Na<sup>+</sup> 598.1890, found 598.1891; IR (KBr thin film, cm<sup>−1</sup>): ν 3317, 3055, 2931, 2853, 2224, 1495, 1462, 1374, 1256, 1026, 744, 697.

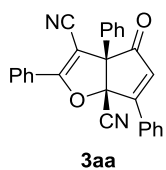



**4-oxo-2,3a,6-triphenyl-4,6a-dihydro-3aH-cyclopenta[b]furan-3,6a-dicarbonitrile(3aa):**

Purified using petroleum ether-ethyl acetate (10:1 v/v). White solid, mp 110–111 °C, 0.325 g, 80% yield. <sup>1</sup>H NMR (600 MHz, CDCl<sub>3</sub>) δ 8.04 (d, *J* = 7.5 Hz, 2H), 8.01 (d, *J* = 6.9 Hz, 2H), 7.61–7.57 (m, 4H), 7.53–7.46 (m, 5H), 7.38 (d, *J* = 7.2 Hz, 2H), 7.13 (s, 1H); <sup>13</sup>CNMR (150 MHz, CDCl<sub>3</sub>) δ 198.2, 165.9, 163.1, 133.2, 133.0, 130.2, 130.1, 129.8, 129.7, 129.3, 129.0, 128.7, 128.4, 127.7, 125.8, 114.0, 113.3, 90.5, 85.7, 71.5; HRMS (ESI, *m/z*): calcd. for C<sub>27</sub>H<sub>16</sub>O<sub>2</sub>N<sub>2</sub>H<sup>+</sup> 401.1285, found 401.1281; IR (KBr thin film, cm<sup>-1</sup>): 3358, 3187, 2920, 2215, 1727, 1656, 1344, 1286, 1135, 766, 751, 688.

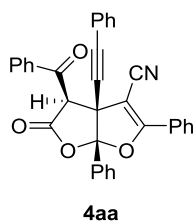

**4-benzoyl-5-oxo-2,6a-diphenyl-3a-(phenylethynyl)-3a,4,5,6a-tetrahydrofuro[2,3-**

**b]furan-3-carbonitrile (4aa):** Purified using petroleum ether-ethyl acetate (5:1 v/v). White solid, mp 148–149 °C, 0.450 g, 88% yield. <sup>1</sup>H NMR (600 MHz, CDCl<sub>3</sub>) δ 8.09 (dd, *J* = 20.9, 6.9 Hz, 4H), 7.78 (d, *J* = 4.7 Hz, 2H), 7.62 (s, 2H), 7.56–7.47 (m, 7H), 7.14–7.13 (m, 1H), 7.01 (t, *J* = 6.7 Hz, 2H), 6.44 (d, *J* = 6.7 Hz, 2H), 5.32 (s, 1H); <sup>13</sup>C NMR (150 MHz, CDCl<sub>3</sub>) δ 191.4, 168.9, 165.0, 135.8, 134.6, 133.4, 133.0, 131.2, 130.5, 129.5, 129.3, 129.2, 129.1, 128.1, 128.0, 128.0, 127.4, 125.9, 120.5, 117.5, 115.1, 94.6, 87.5, 80.8, 58.8, 57.4; HRMS (ESI, *m/z*): calcd. for C<sub>34</sub>H<sub>21</sub>O<sub>4</sub>NH<sup>+</sup> 508.1453, found 508.1456; IR (KBr thin film, cm<sup>-1</sup>): ν 3072, 2922, 2216, 1809, 1682, 1634, 1449, 1268, 1207, 978, 758, 687.

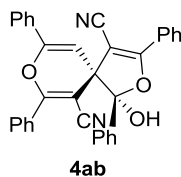

**1-hydroxy-1,3,7,9-tetraphenyl-2,8-dioxaspiro[4.5]deca-3,6,9-triene-4,6-dicarbonitrile**

**(4ab):** Purified using petroleum ether-ethyl acetate (10:1 v/v). White solid, mp 136–137 °C, 0.390 g, 76% yield. <sup>1</sup>H NMR (600 MHz, CD<sub>3</sub>OD) δ 8.14 (d, *J* = 7.3 Hz, 2H), 7.79 (d, *J* = 6.9 Hz, 2H), 7.70 (d, *J* = 5.4 Hz, 2H), 7.65–7.57 (m, 4H), 7.50–7.43 (m, 6H), 7.36 (t, *J* = 7.3 Hz, 2H), 7.22 (d, *J* = 7.2 Hz, 2H), 6.18 (s, 1H); <sup>13</sup>C NMR (150 MHz, CD<sub>3</sub>OD) δ 166.5, 162.4, 150.5, 138.4, 132.2, 131.9, 131.4, 131.3, 129.7, 129.2, 129.1, 128.8, 128.6, 128.2, 128.0, 127.3, 126.4, 124.8, 116.9, 116.1, 113.2, 96.3, 89.1, 88.0, 56.7; HRMS (ESI, *m/z*): calcd. for

$C_{34}H_{22}O_3N_2H^+$  507.1703, found 507.1700; IR (KBr thin film,  $cm^{-1}$ ):  $\nu$  3199, 2922, 2208, 1647, 1507, 1263, 1122, 1092, 764, 700.

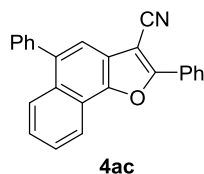

**2,5-diphenylnaphtho[1,2-*b*]furan-3-carbonitrile (4ac):** Purified using petroleum ether-ethyl acetate (10:1 v/v). Light yellow solid, mp 189–190 °C, 0.191 g, 55% yield.  $^1H$  NMR (600 MHz,  $CDCl_3$ )  $\delta$  8.42 (d,  $J$  = 7.8 Hz, 1H), 8.27 (d,  $J$  = 7.4 Hz, 2H), 7.95 (d,  $J$  = 8.5 Hz, 1H), 7.68–7.65 (m, 2H), 7.58 (t,  $J$  = 7.4 Hz, 2H), 7.54–7.45 (m, 7H);  $^{13}C$  NMR (150 MHz,  $CDCl_3$ )  $\delta$  161.0, 149.0, 140.1, 138.6, 131.0, 130.9, 130.3, 129.4, 128.5, 128.2, 127.8, 127.5, 127.2, 126.5, 126.3, 122.9, 121.0, 120.2, 118.1, 114.5, 89.3; HRMS (ESI,  $m/z$ ): calcd. for  $C_{25}H_{15}ONH^+$  346.1226, found 346.1224; IR (KBr thin film,  $cm^{-1}$ ):  $\nu$  3061, 2922, 2226, 1652, 1634, 1565, 1497, 1268, 1141, 759.

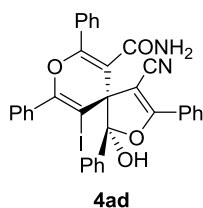

**4-cyano-1-hydroxy-10-iodo-1,3,7,9-tetraphenyl-2,8-dioxaspiro[4.5]deca-3,6,9-triene-6-carboxamide (4ad):** Purified using petroleum ether-ethyl acetate (10:1 v/v). Light yellow solid, mp 165–166 °C, 0.531g, 81% yield.  $^1H$  NMR (400 MHz,  $CDCl_3$ )  $\delta$  9.84 (s, 1H), 8.19 (d,  $J$  = 6.7 Hz, 2H), 7.77 (d,  $J$  = 6.5 Hz, 2H), 7.69 (d,  $J$  = 6.5 Hz, 2H), 7.56–7.40 (m, 7H), 7.36–7.26 (m, 4H), 6.84 (d,  $J$  = 6.9 Hz, 2H), 5.86 (s, 2H);  $^{13}C$  NMR (100 MHz,  $CDCl_3$ )  $\delta$  171.0, 166.9, 156.5, 152.1, 138.5, 132.3, 131.6, 131.5, 129.7, 129.4, 129.2, 129.0, 128.9, 128.0, 128.0, 127.8, 127.3, 117.1, 115.2, 102.3, 91.0, 82.6, 62.8; HRMS (ESI,  $m/z$ ): calcd. for  $C_{34}H_{24}O_4N_2IH^+$  651.0775, found 651.0777; IR (KBr thin film,  $cm^{-1}$ ):  $\nu$  3069, 2922, 2206, 1653, 1447, 1261, 1132, 1026, 765, 694.

### XIII. $^1\text{H}$ NMR and $^{13}\text{C}$ NMR spectra of new compounds

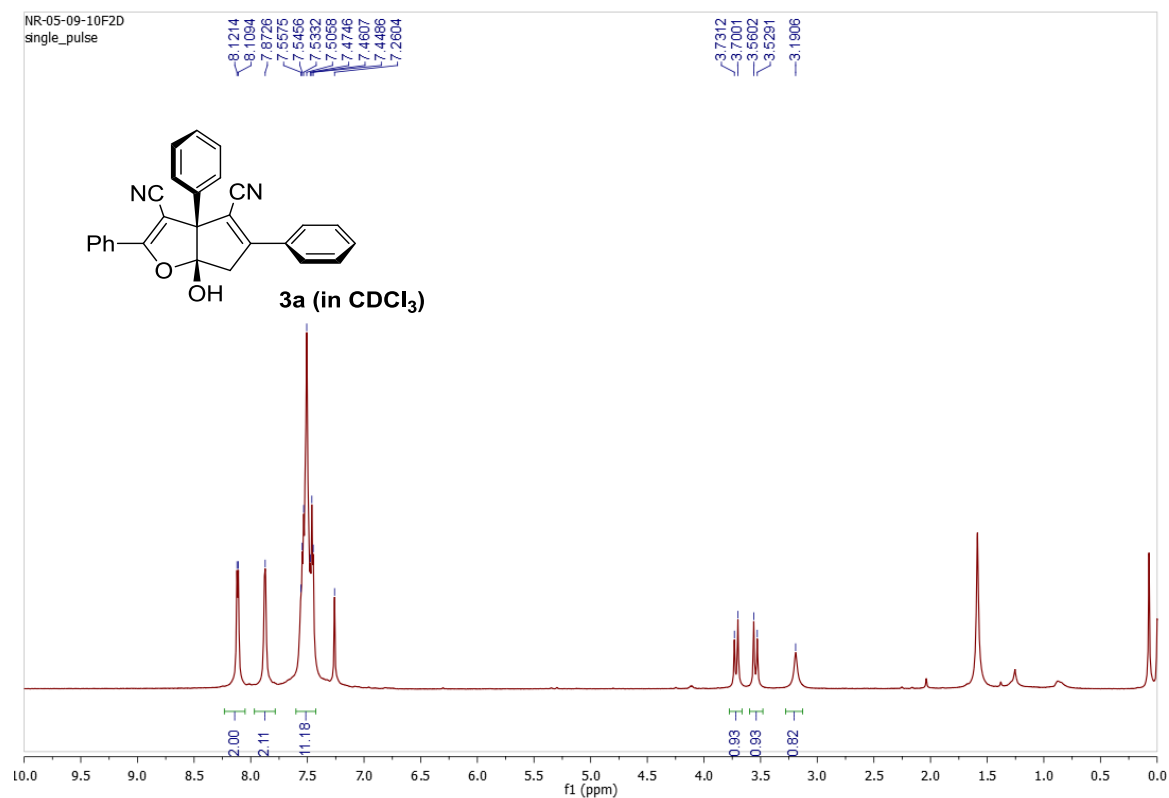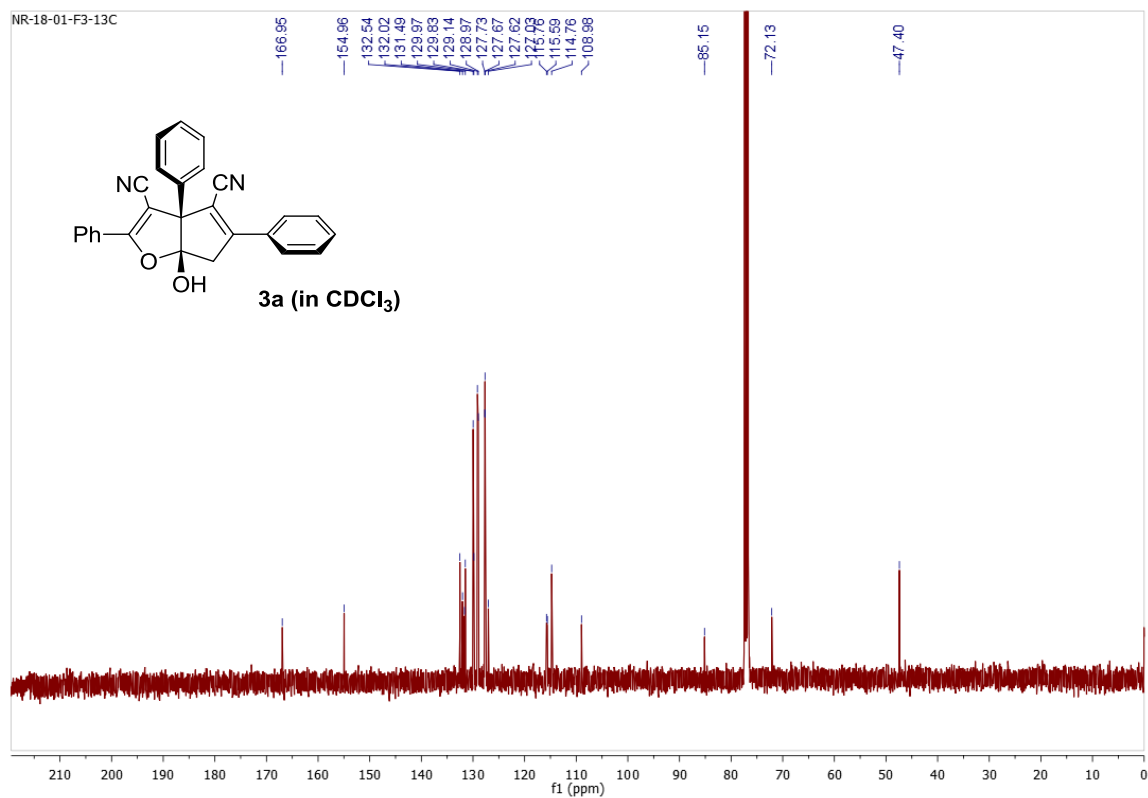

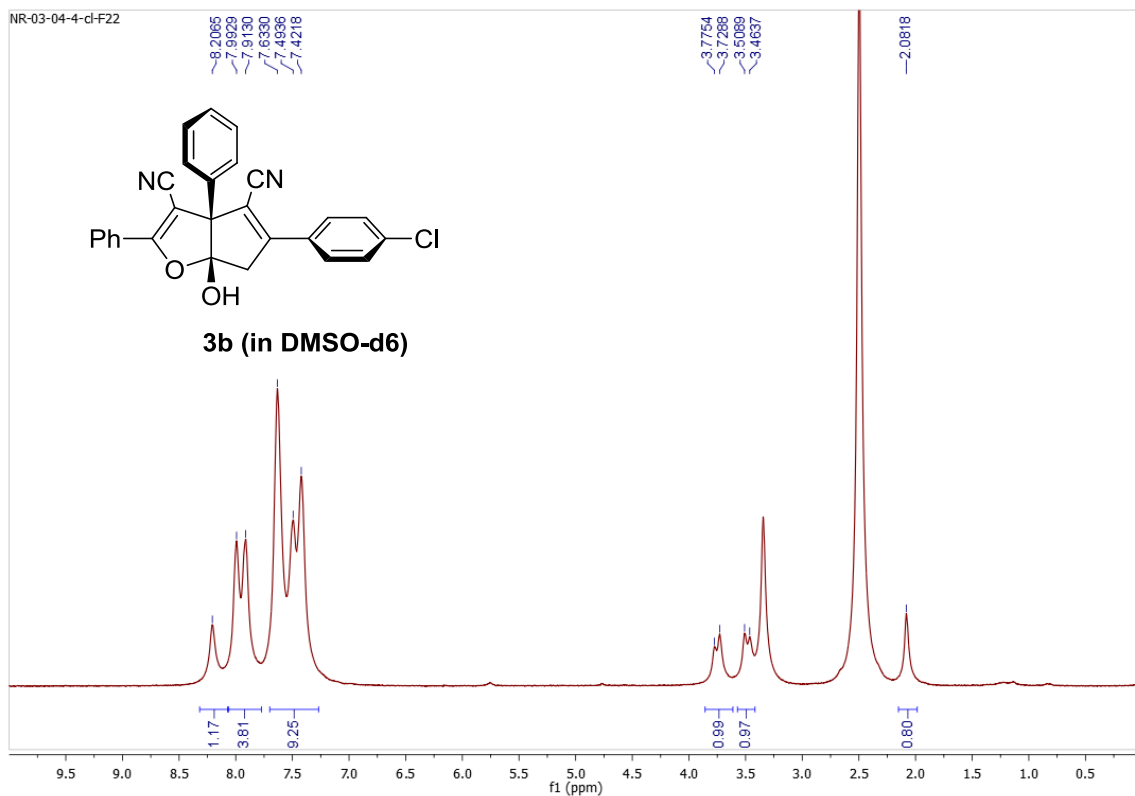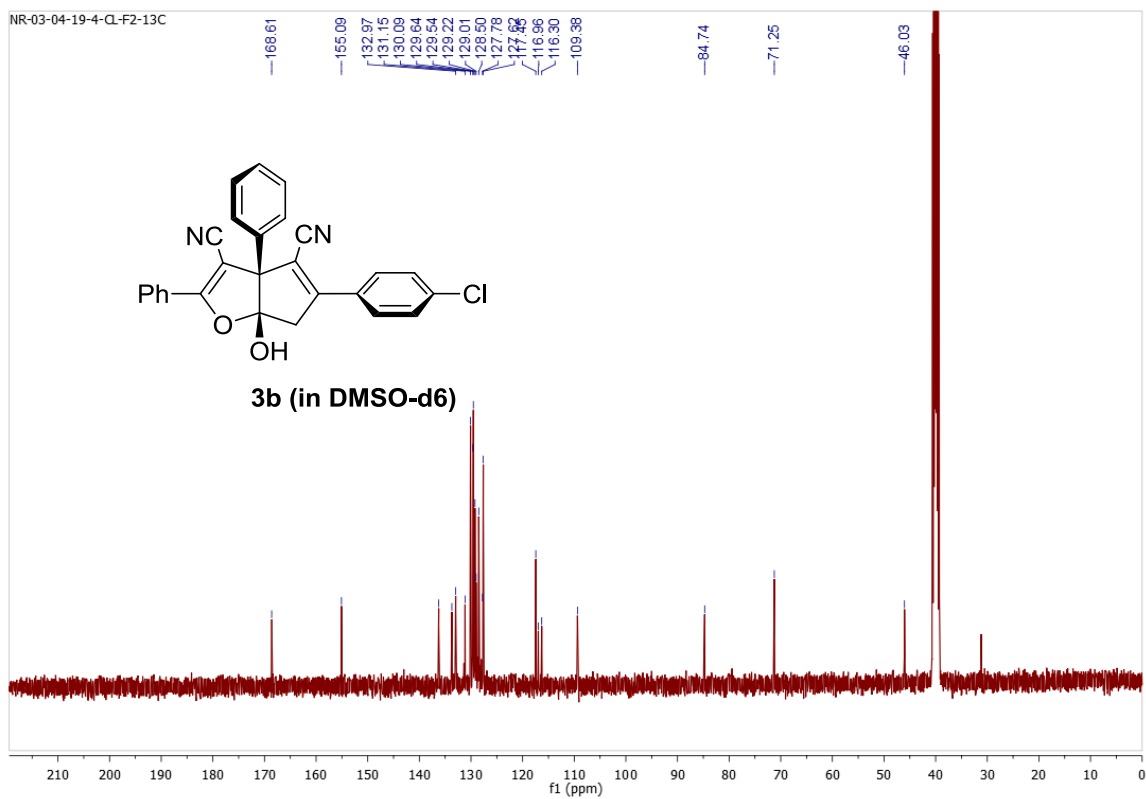

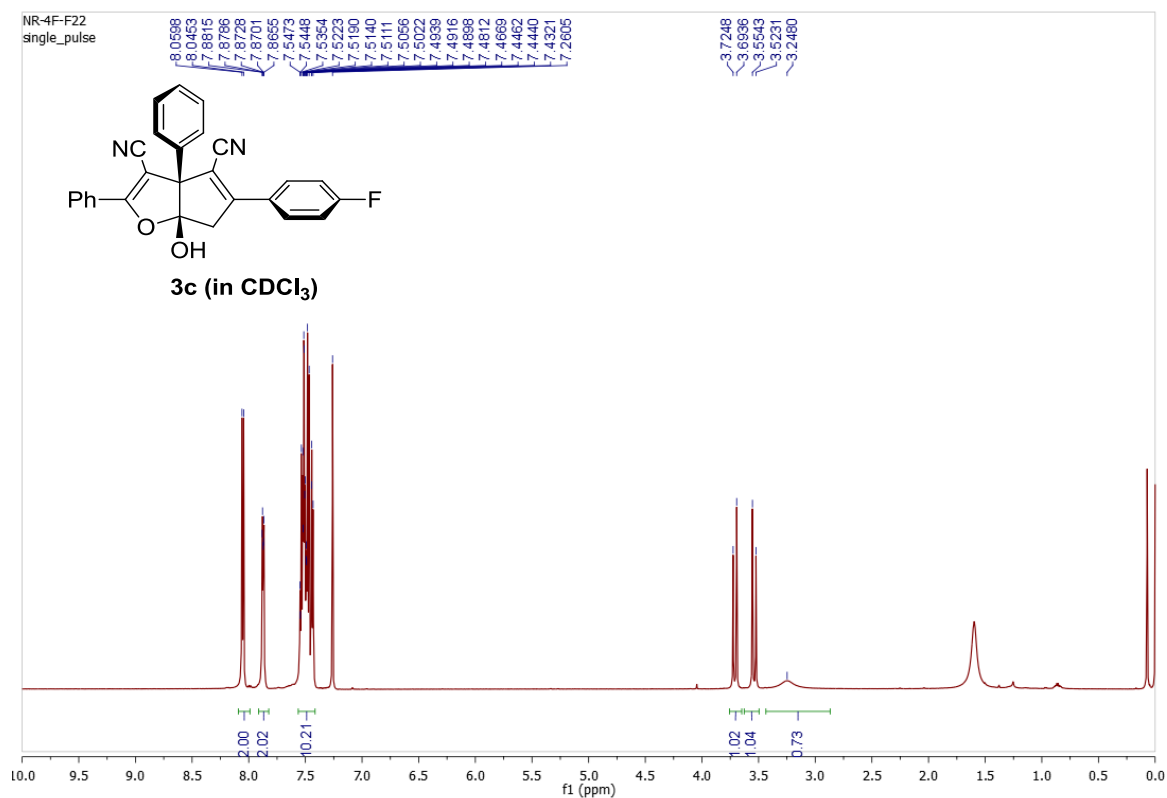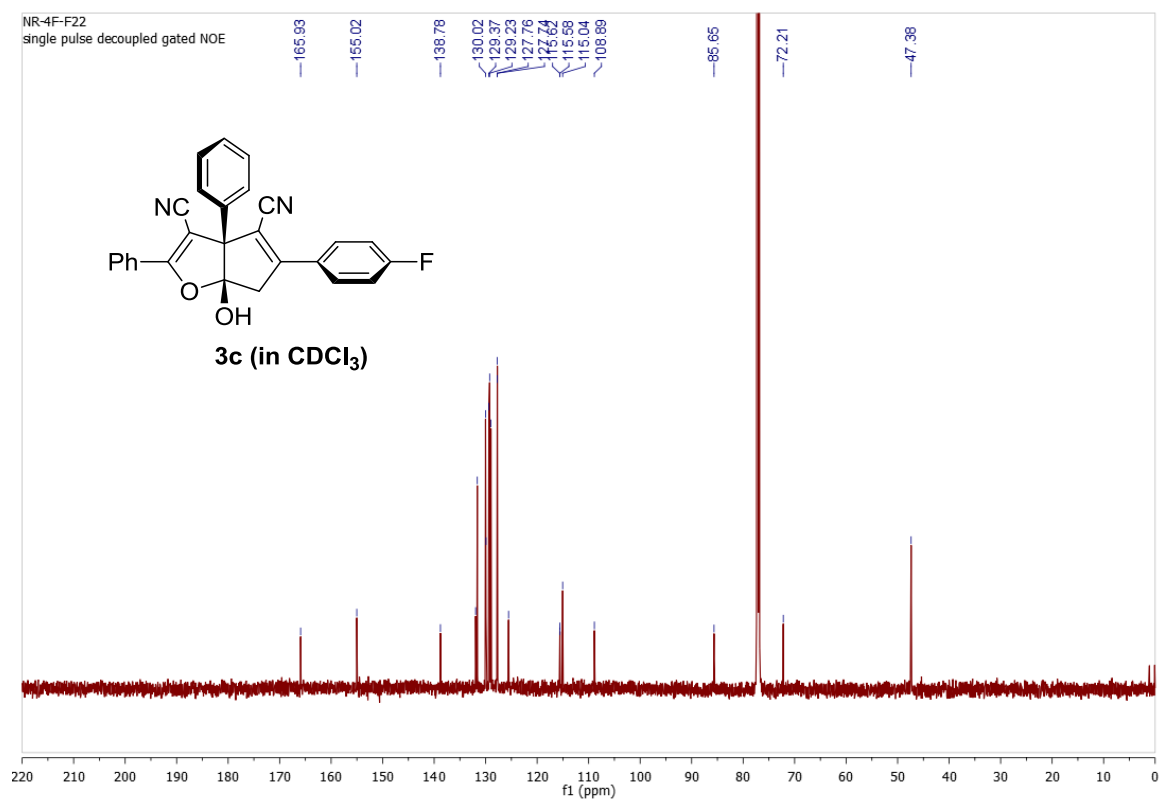

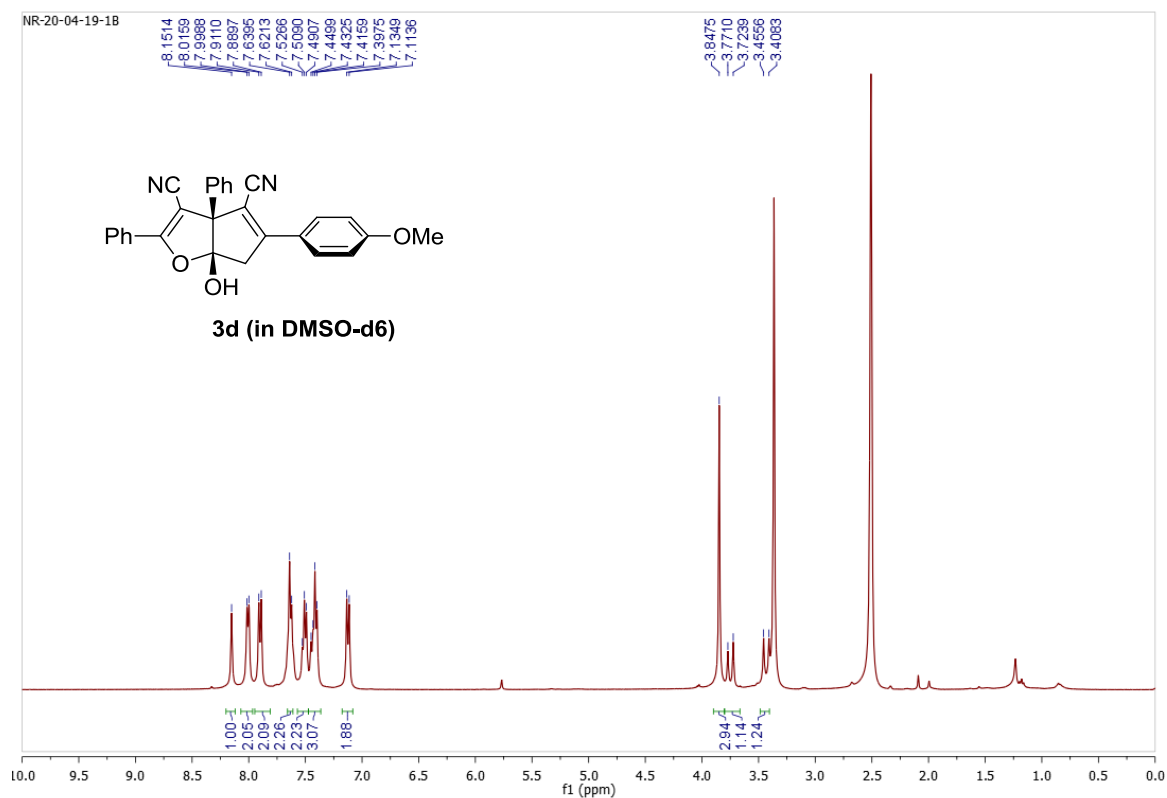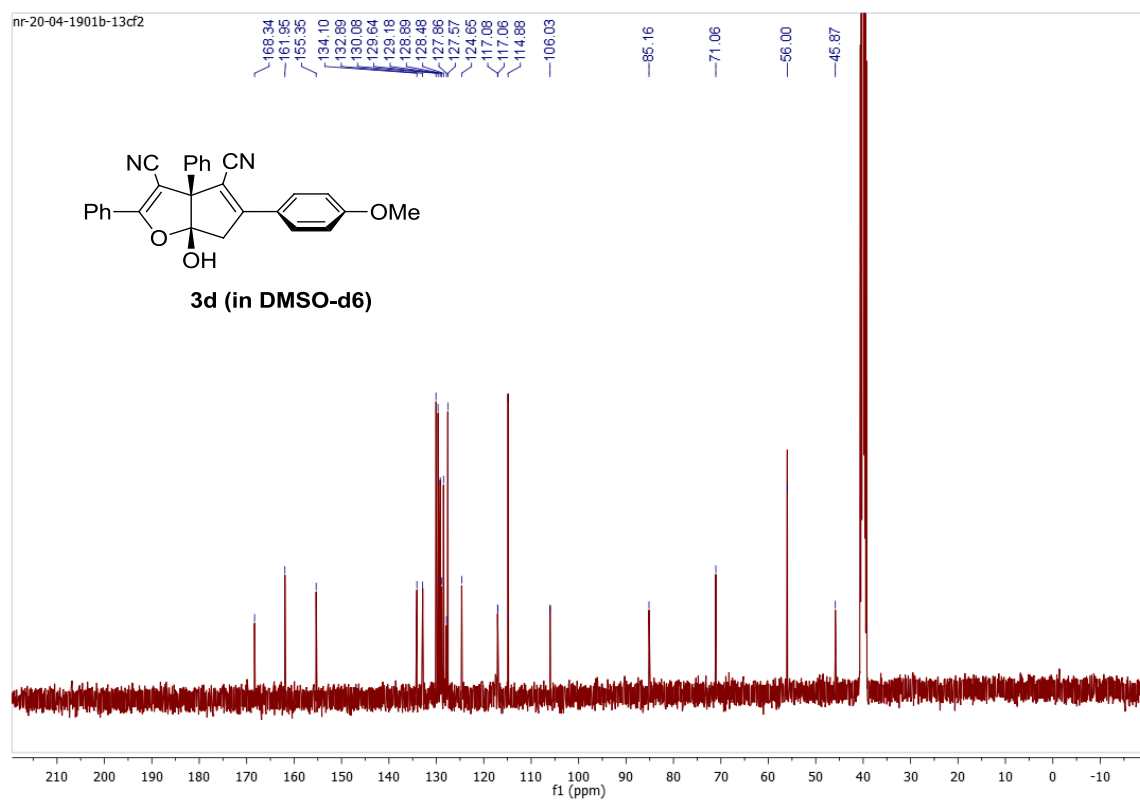

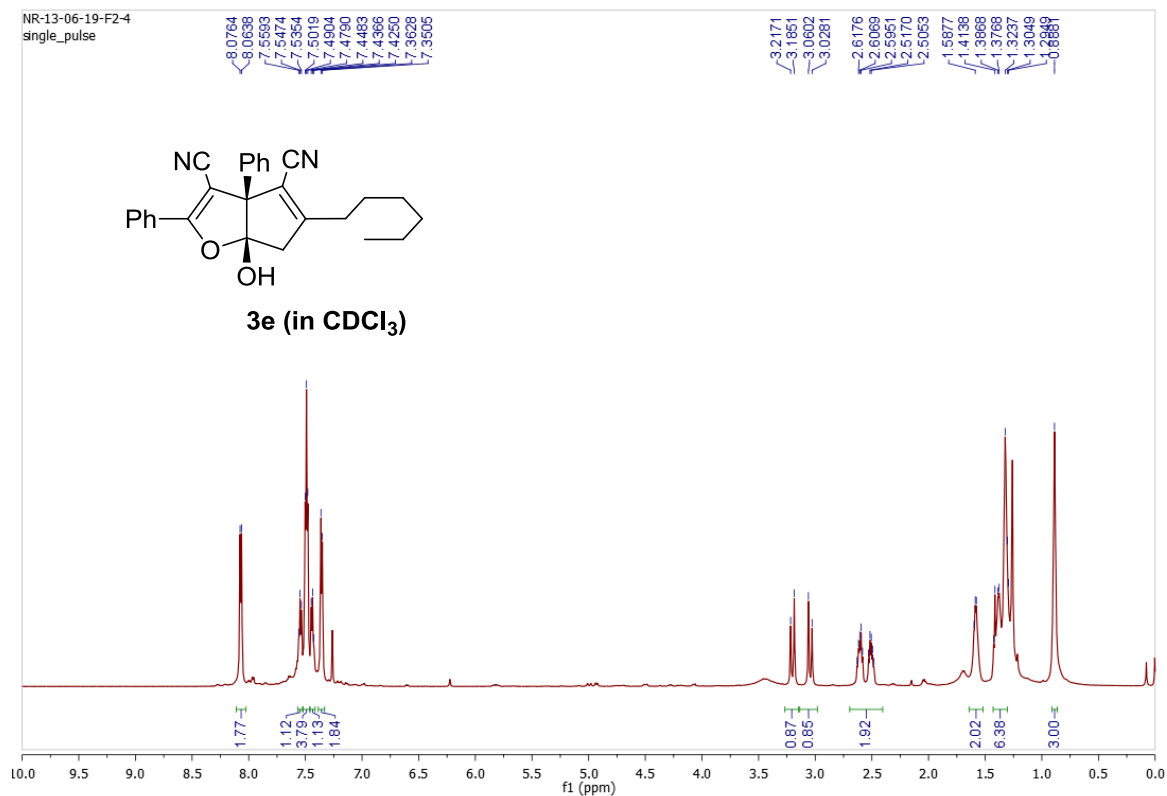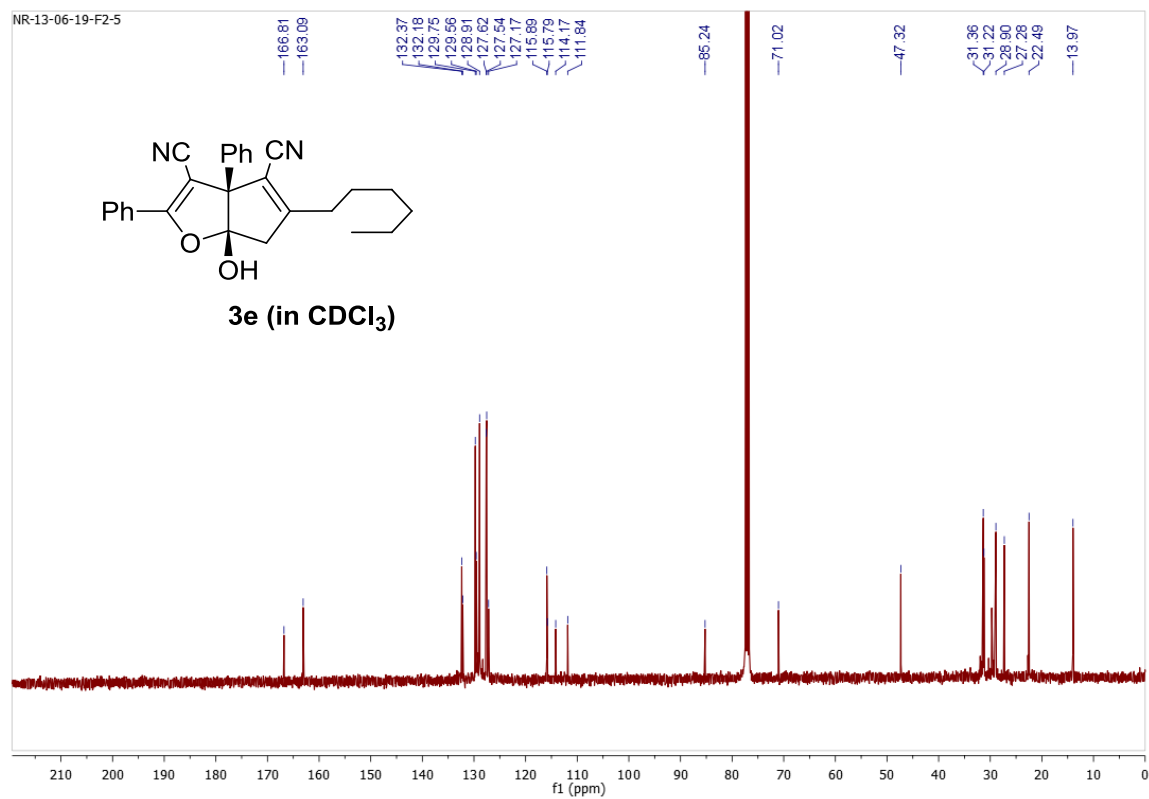





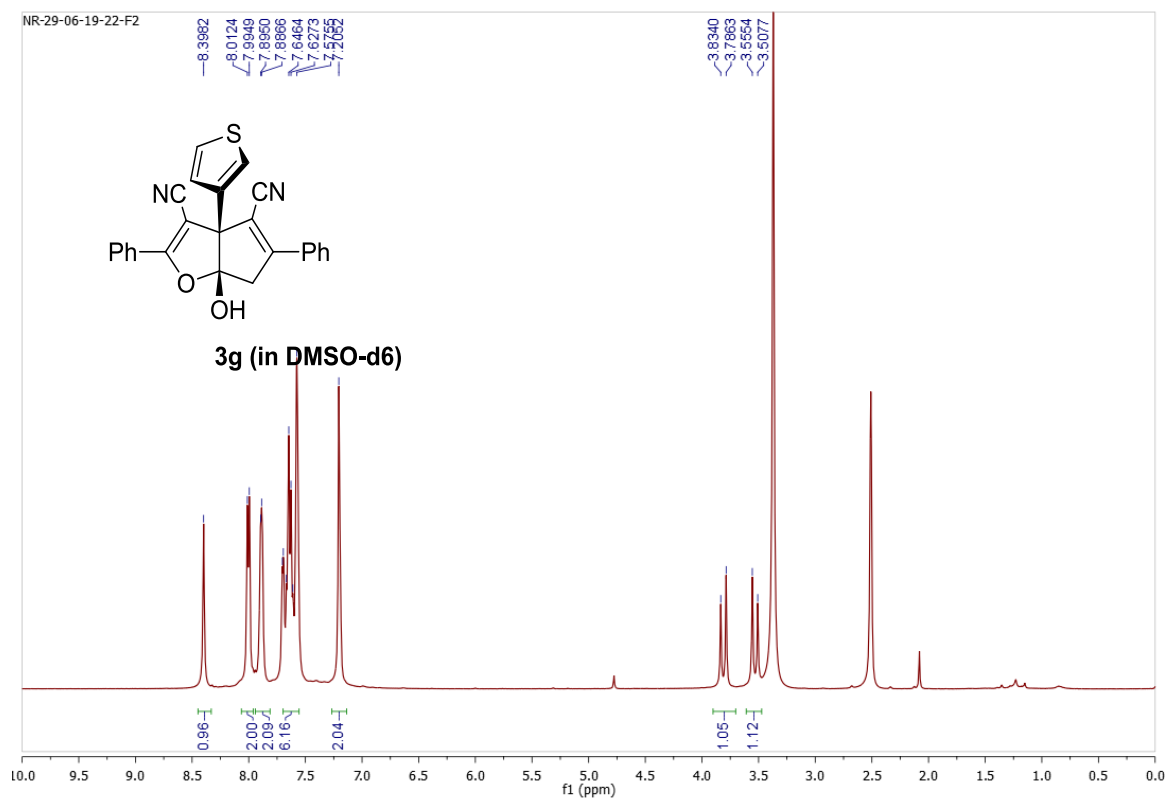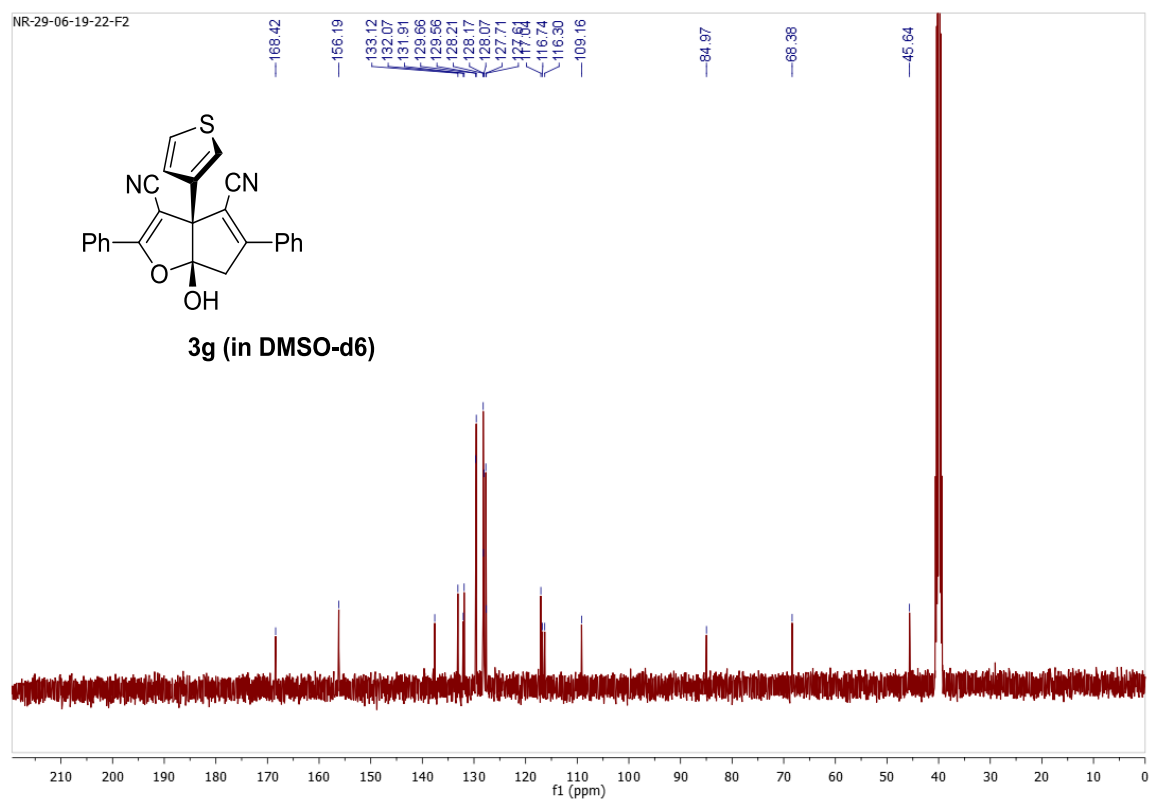

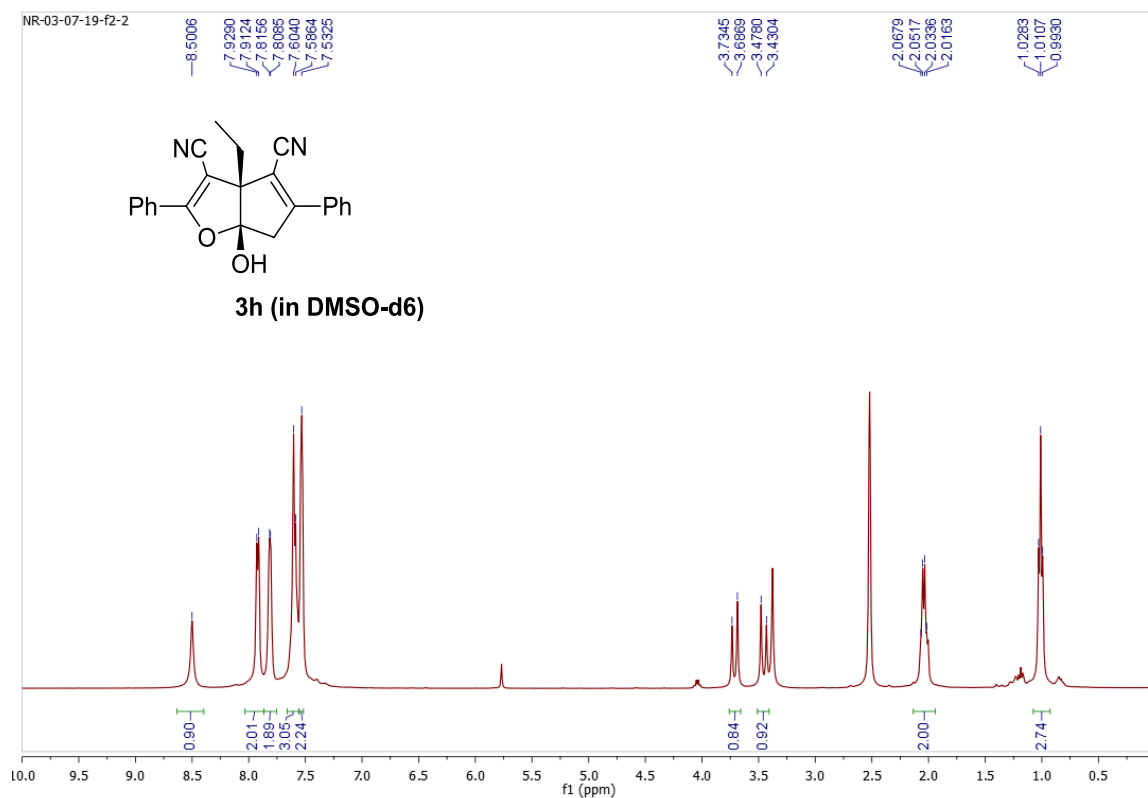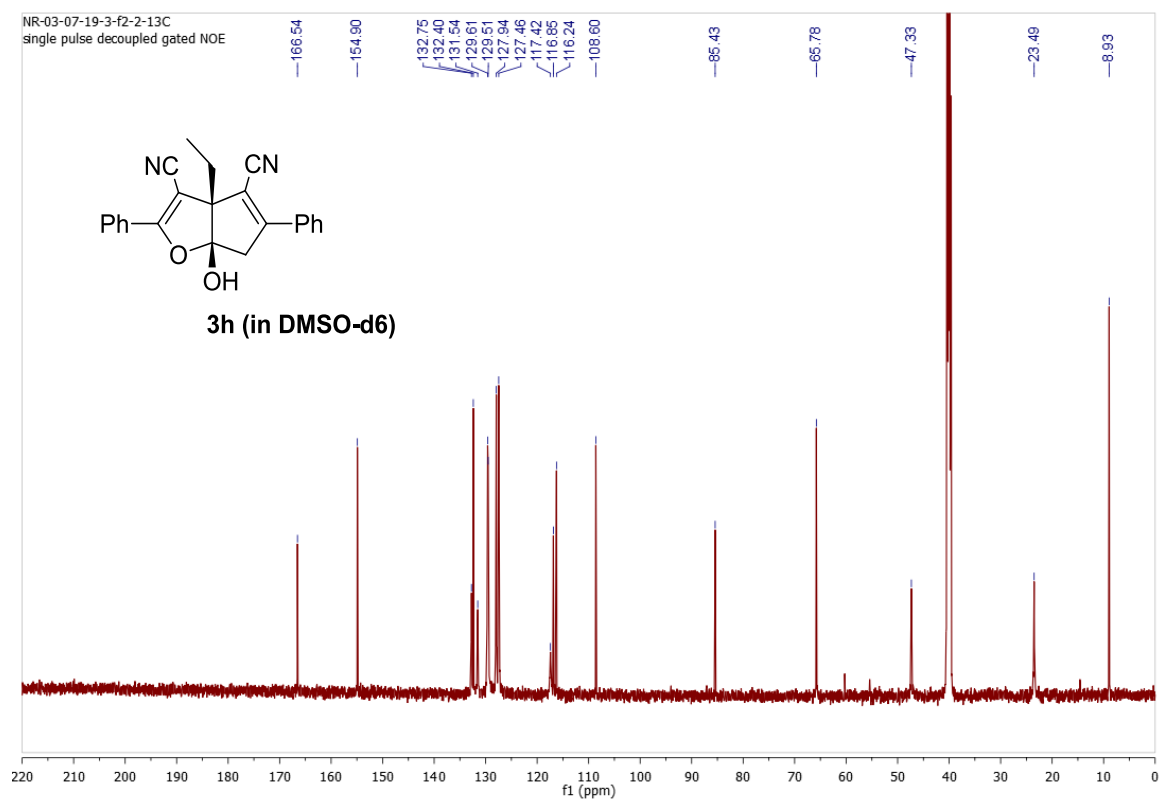

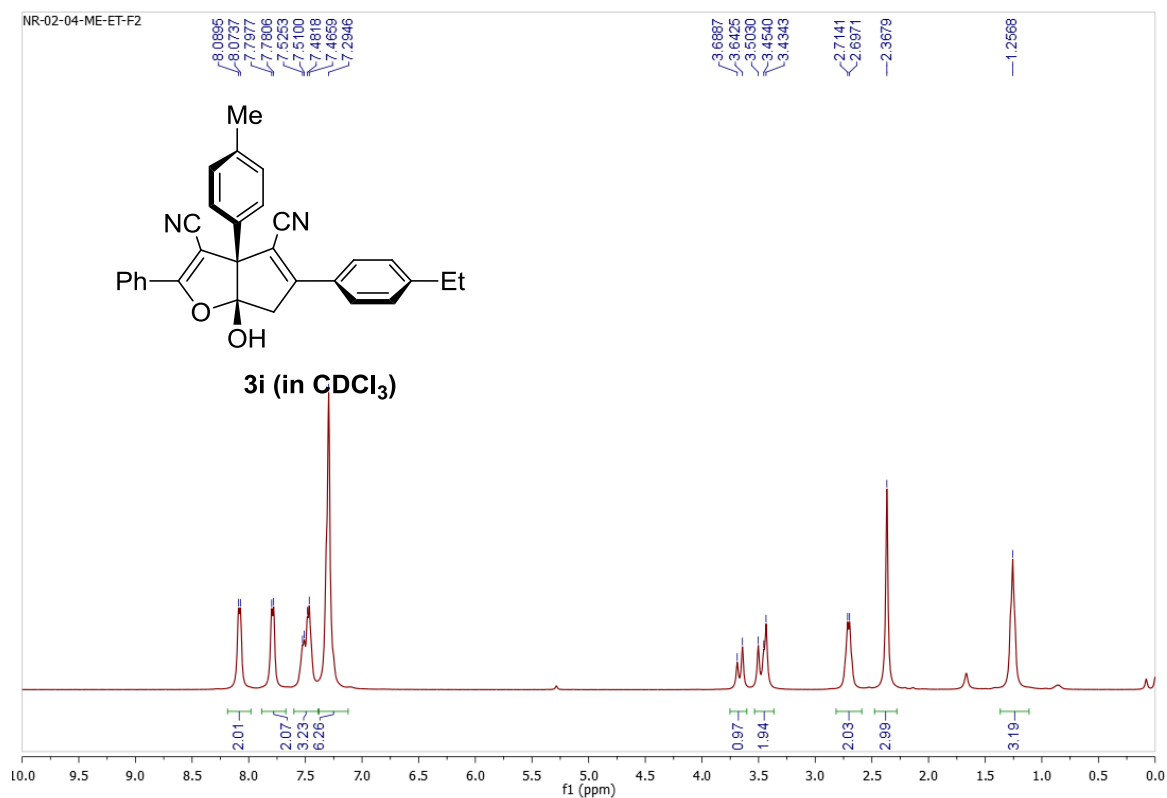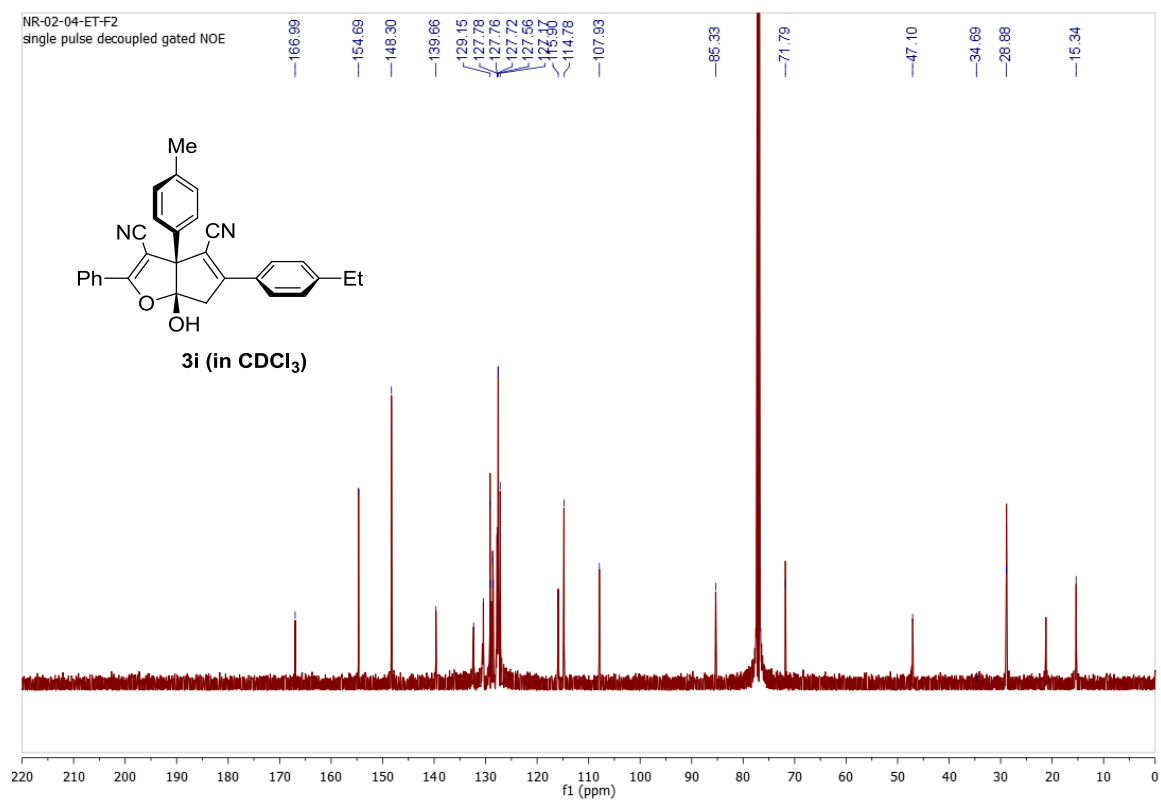

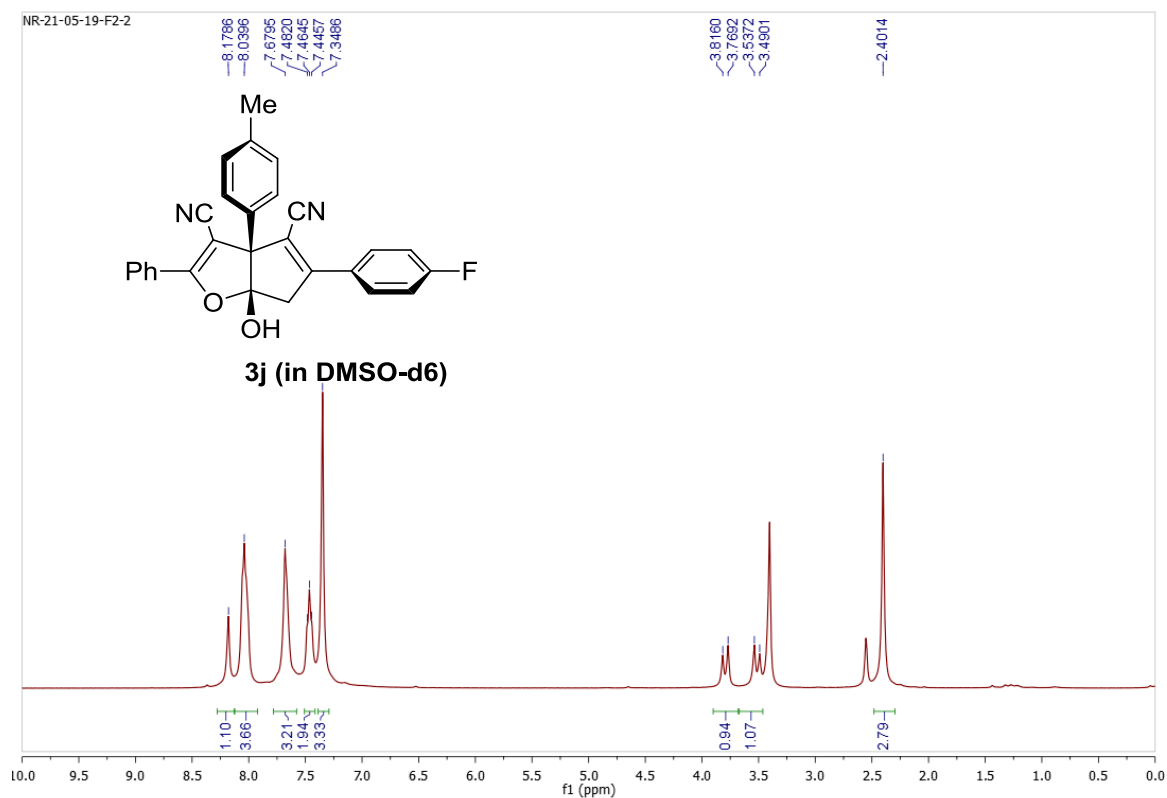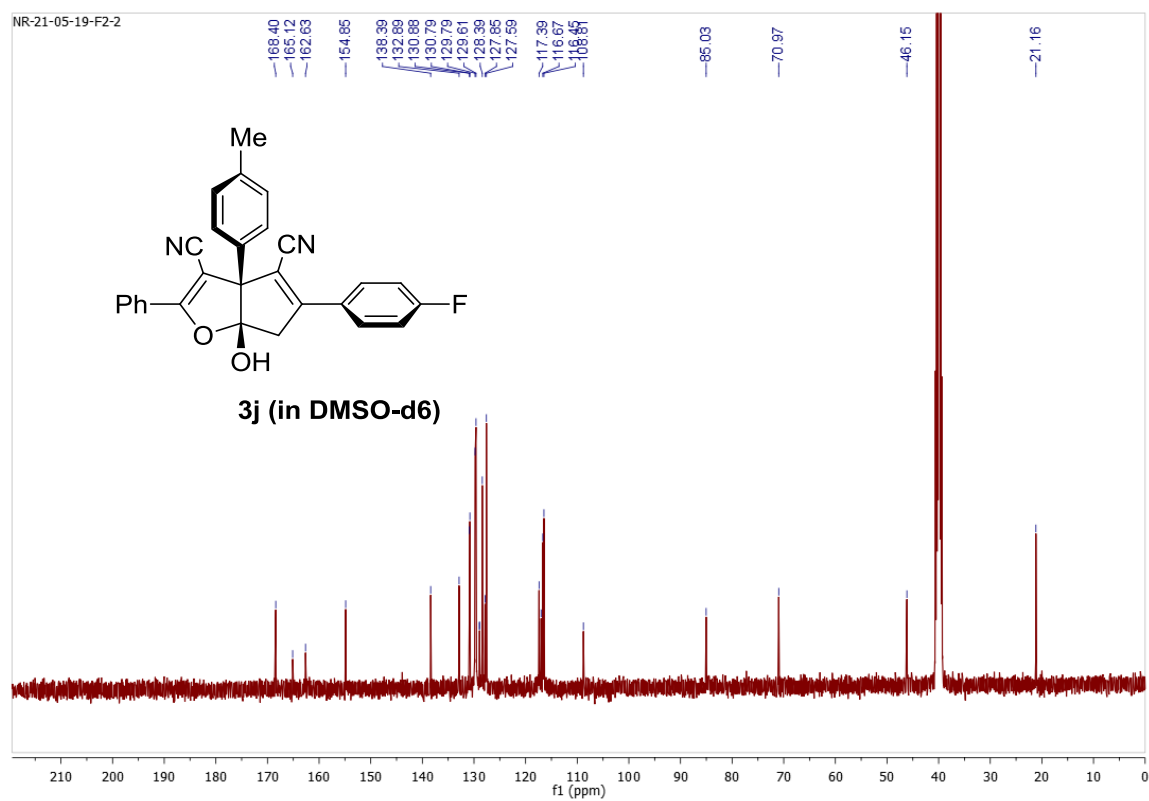

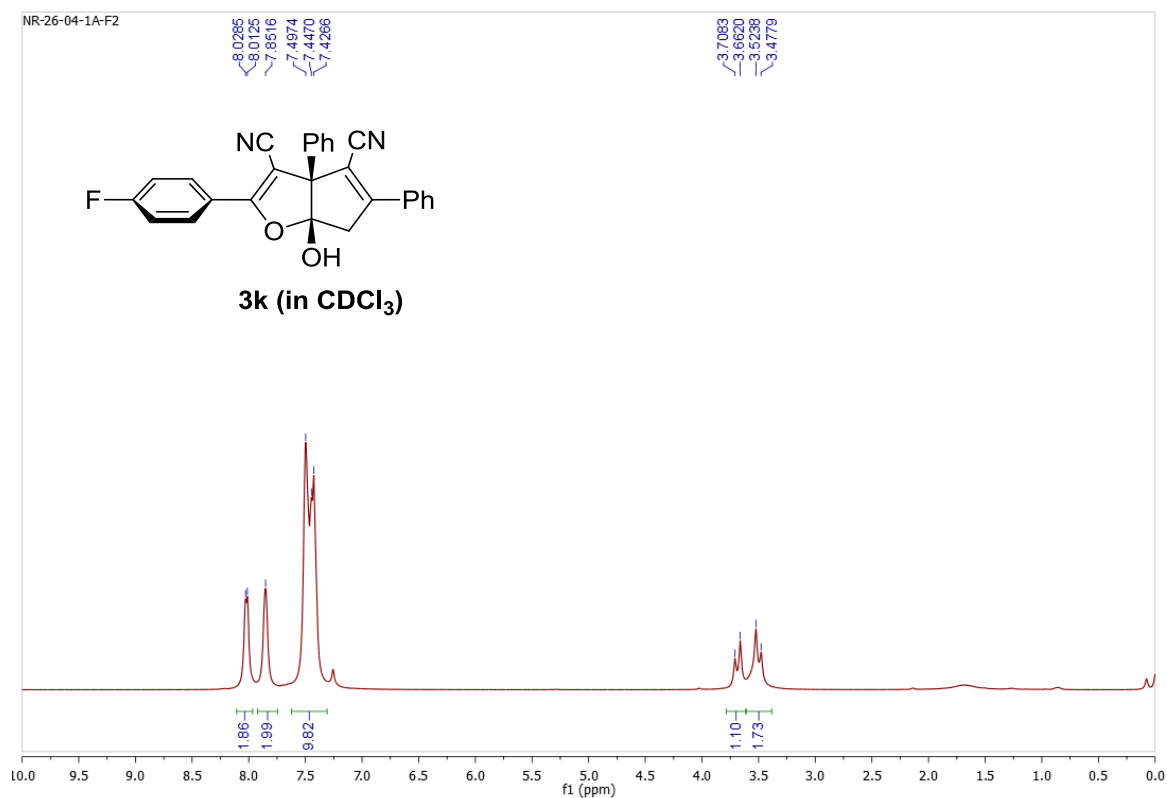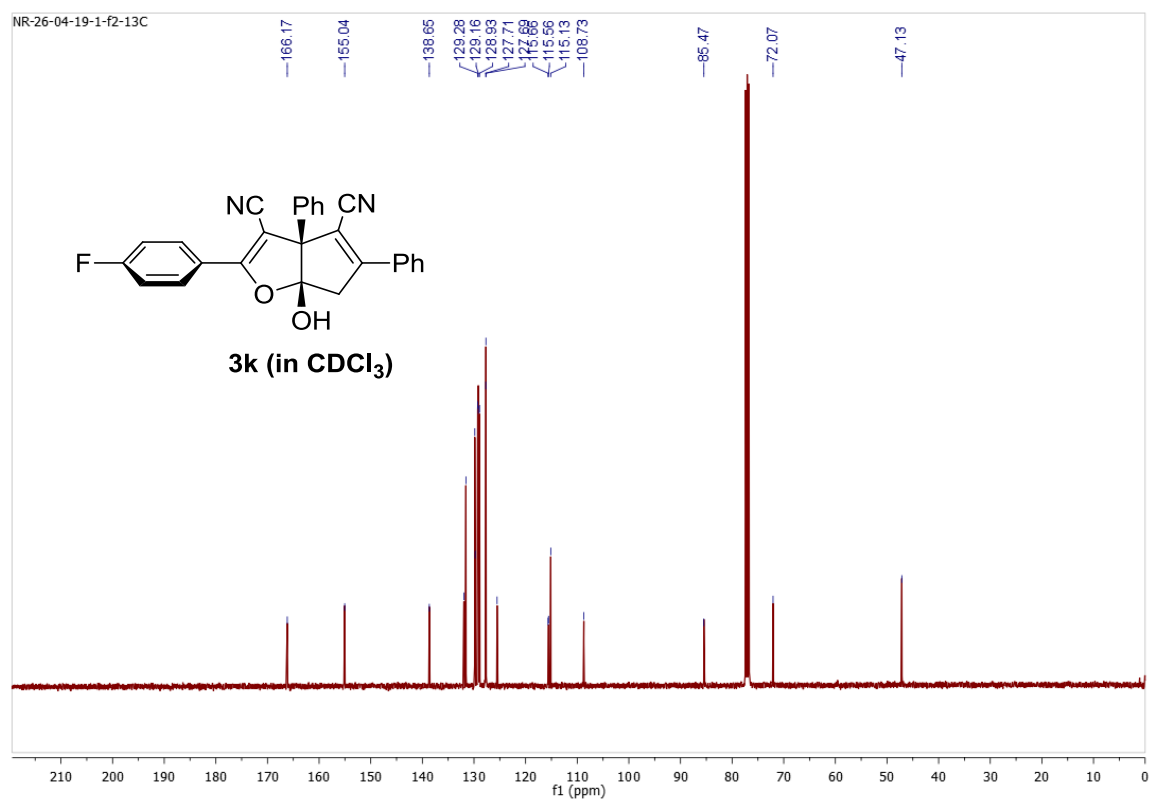

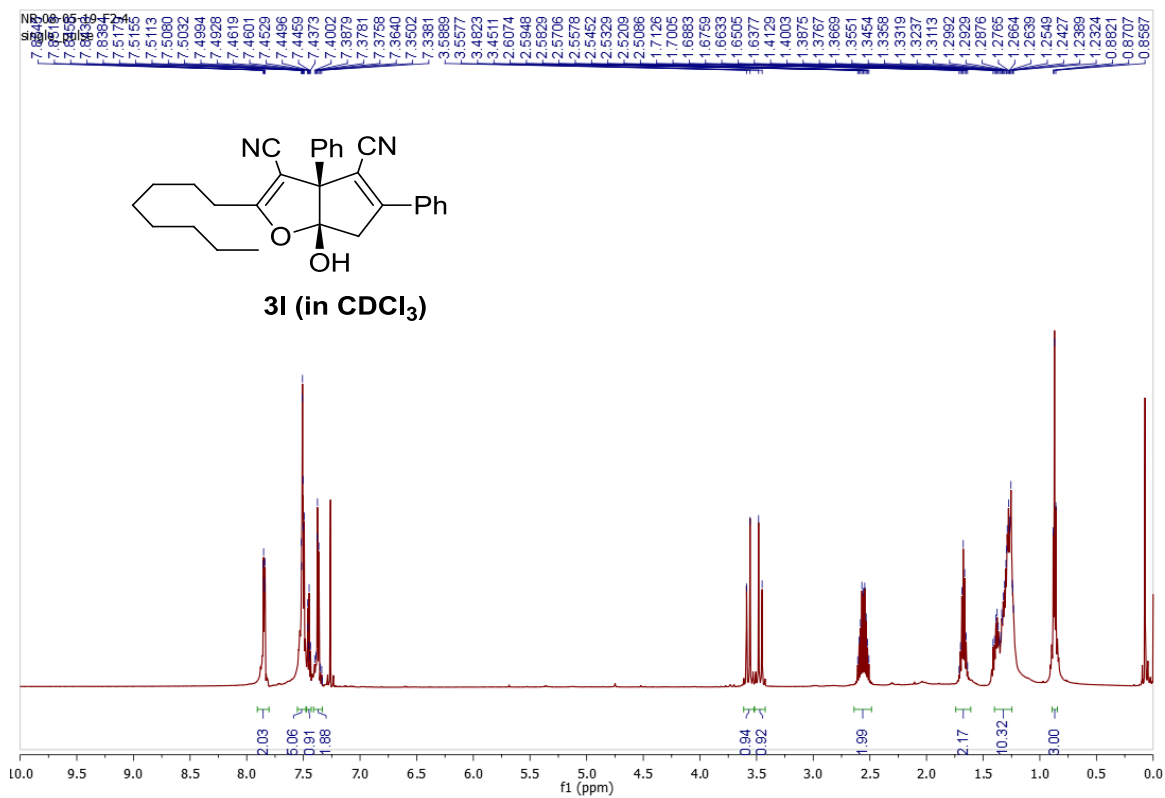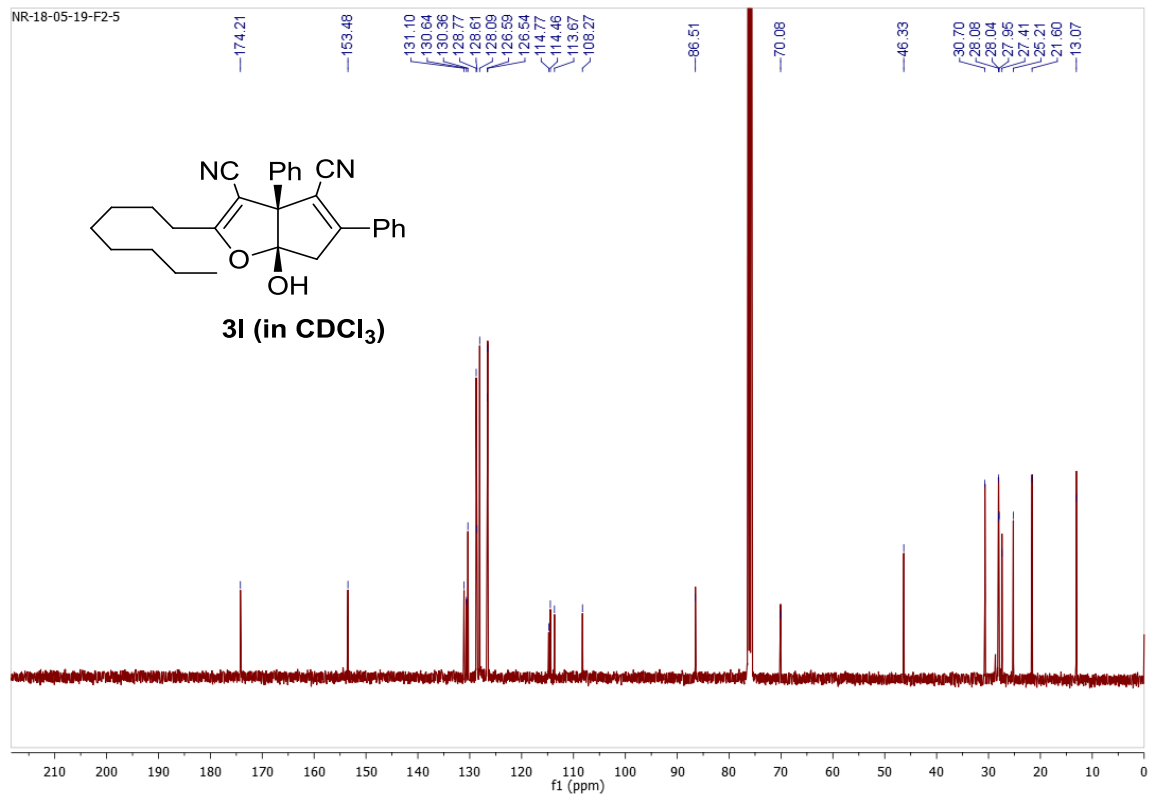

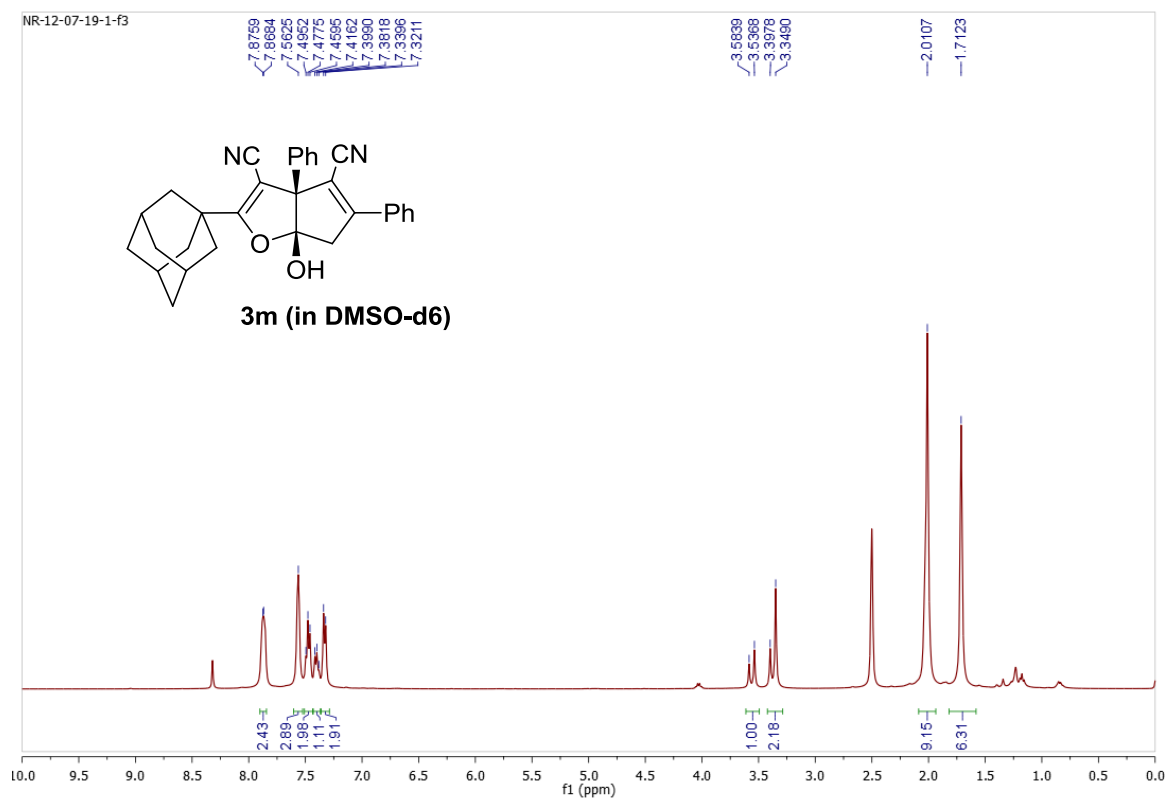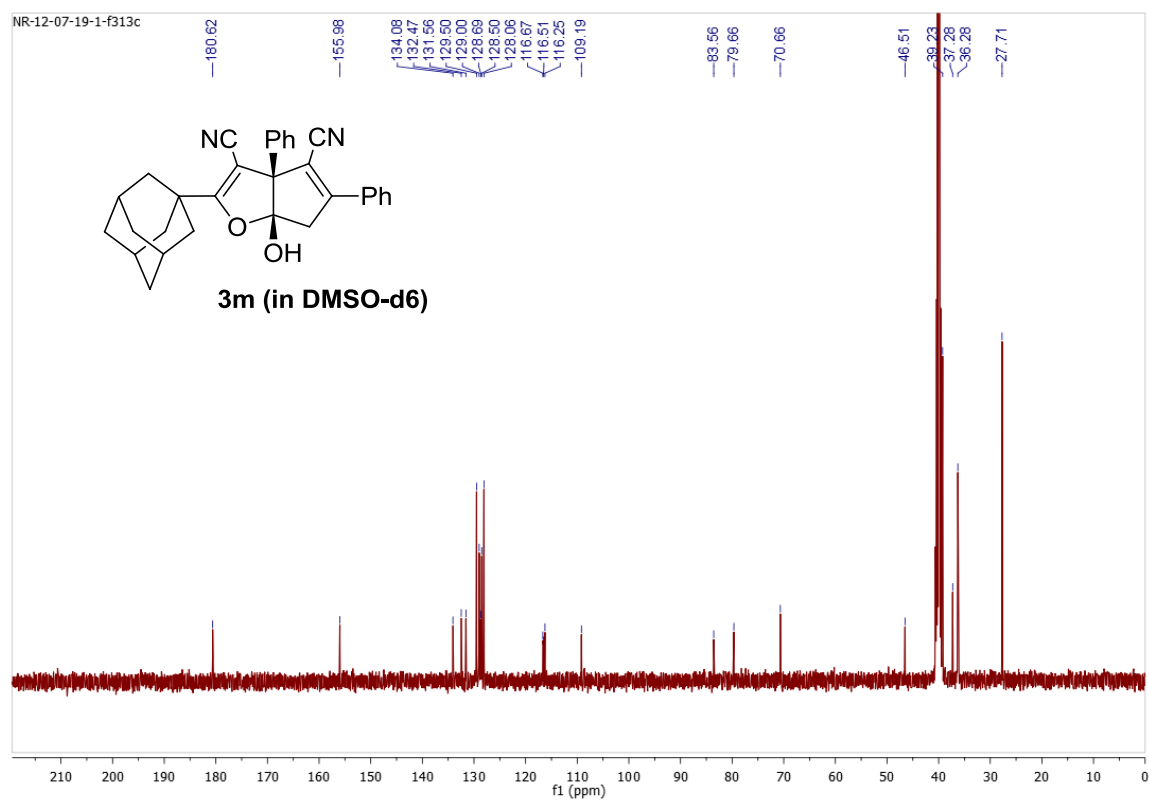

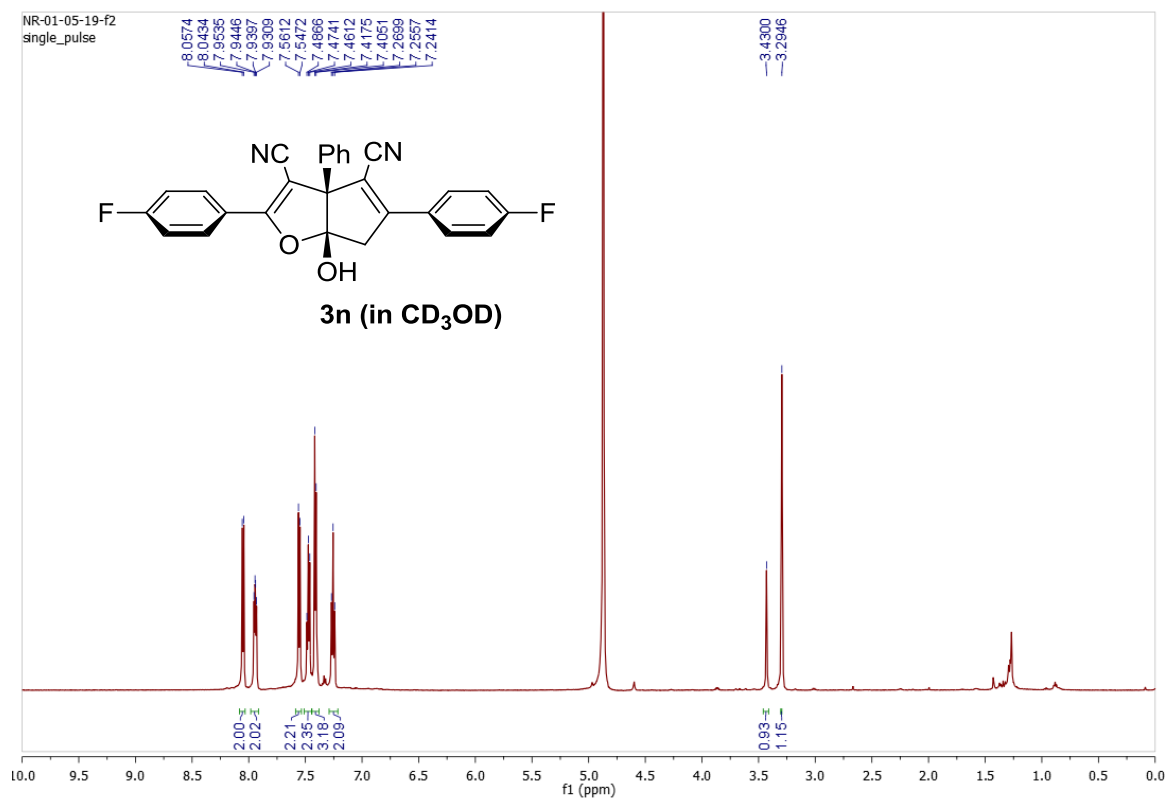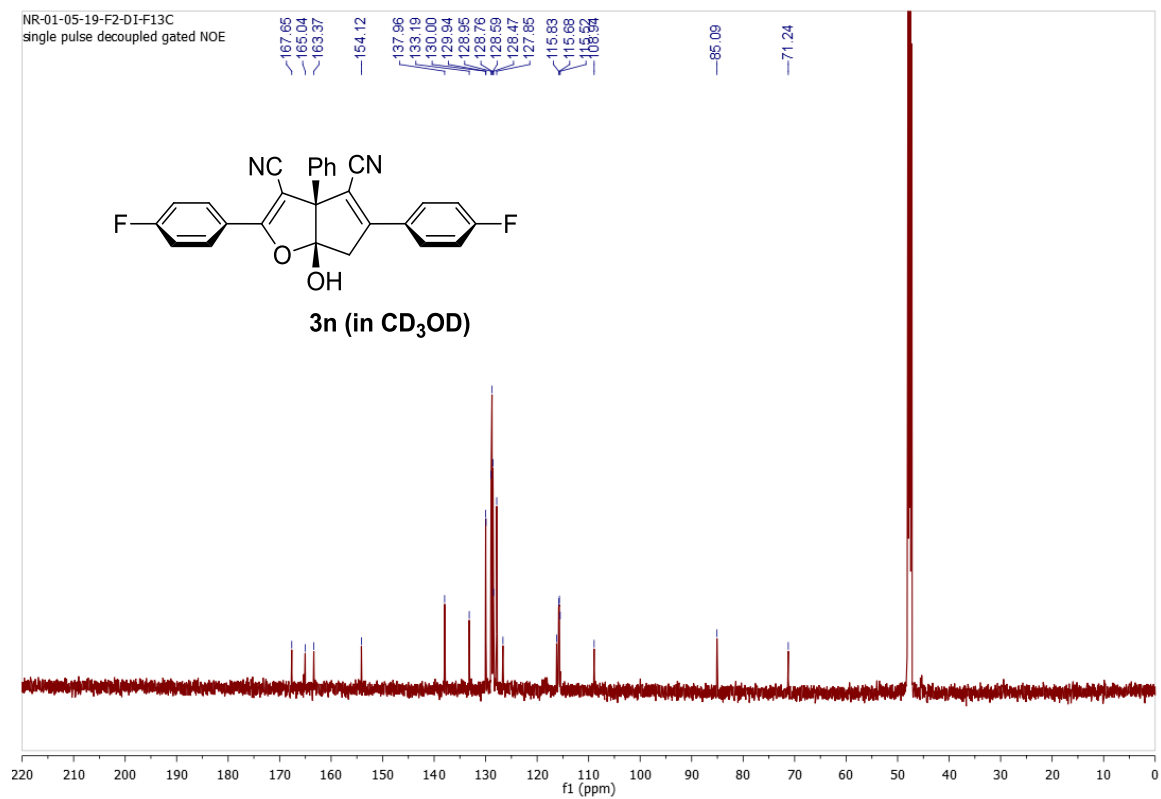



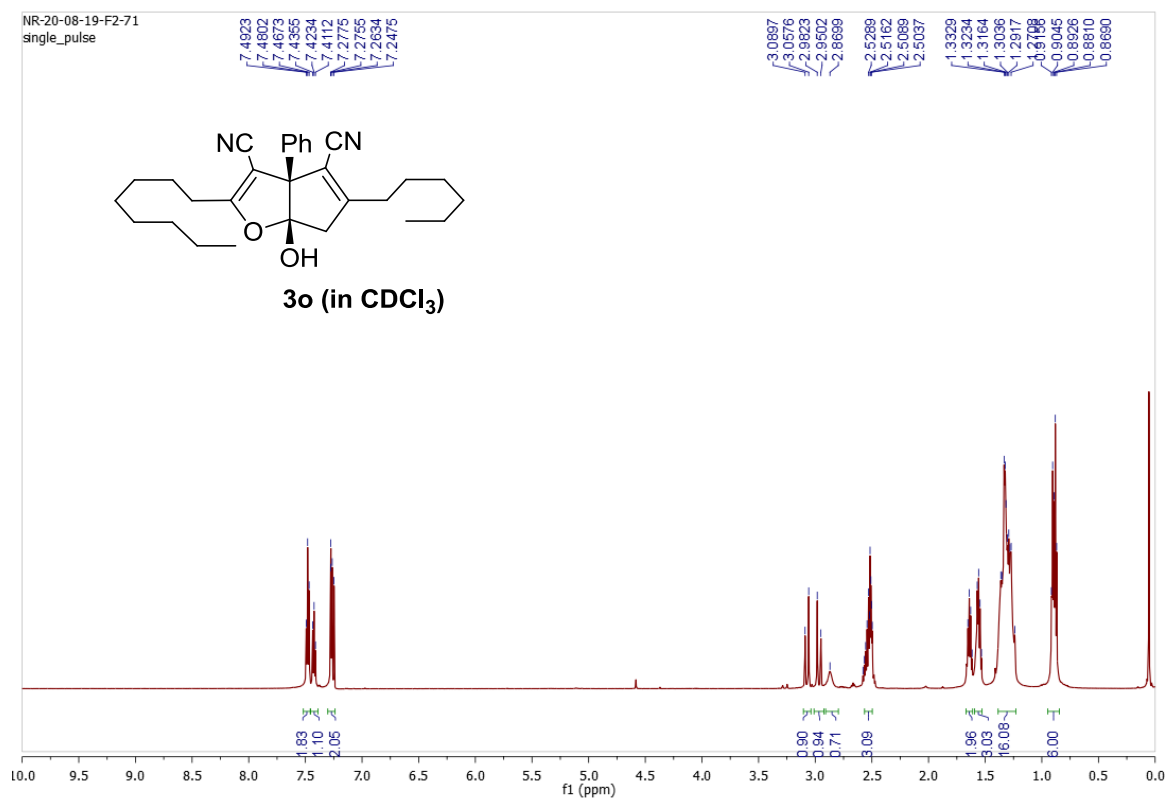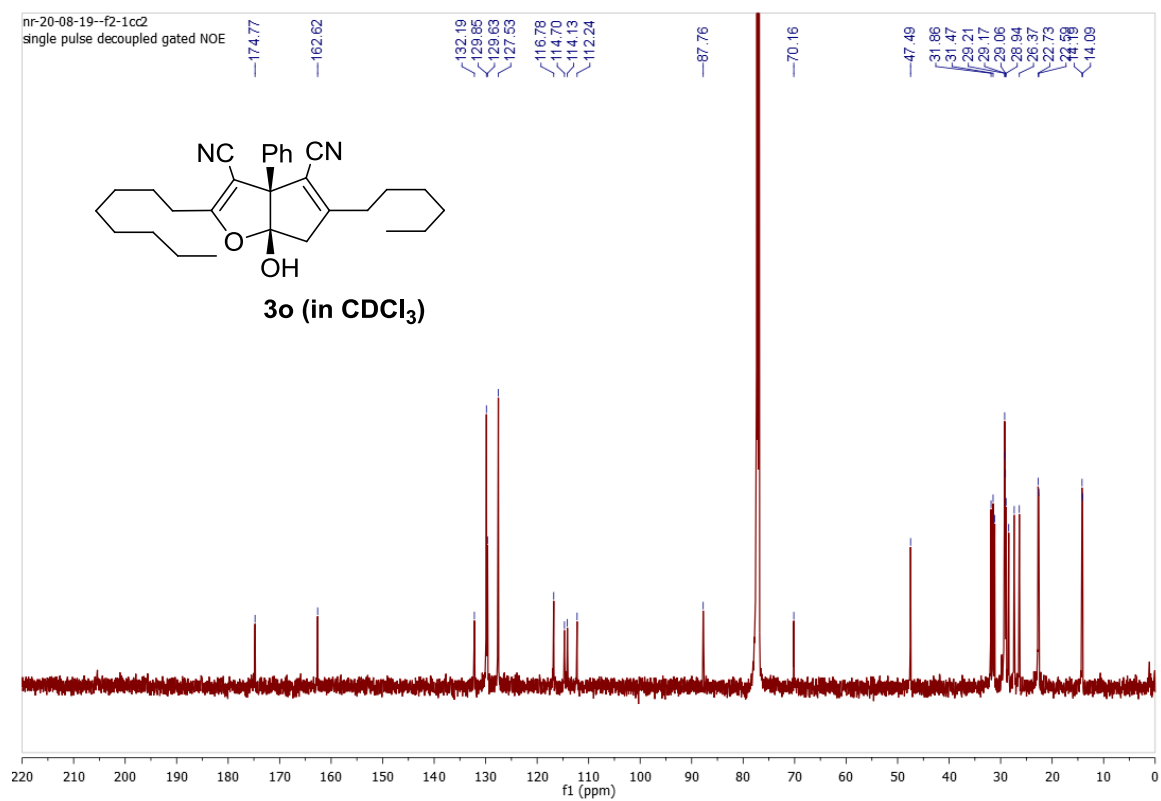

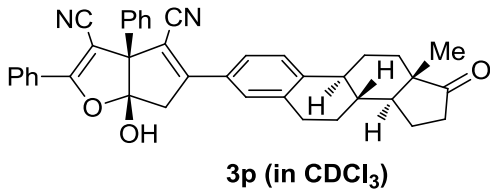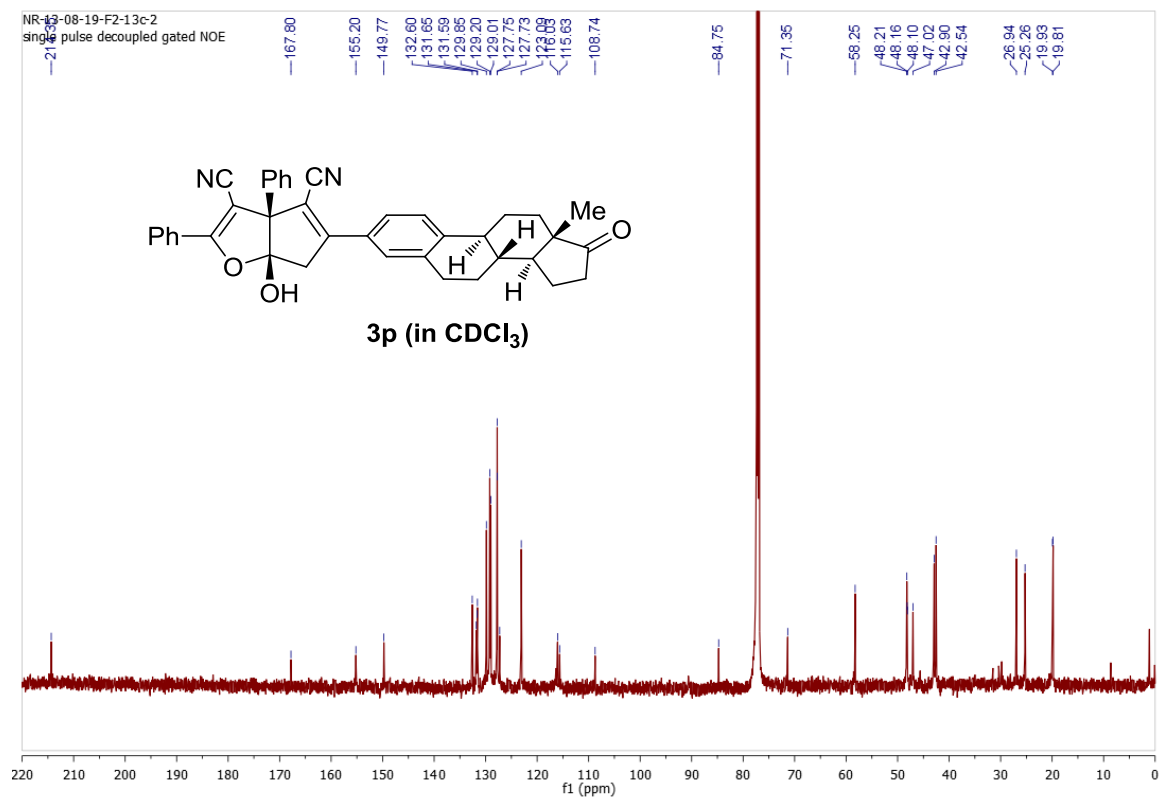

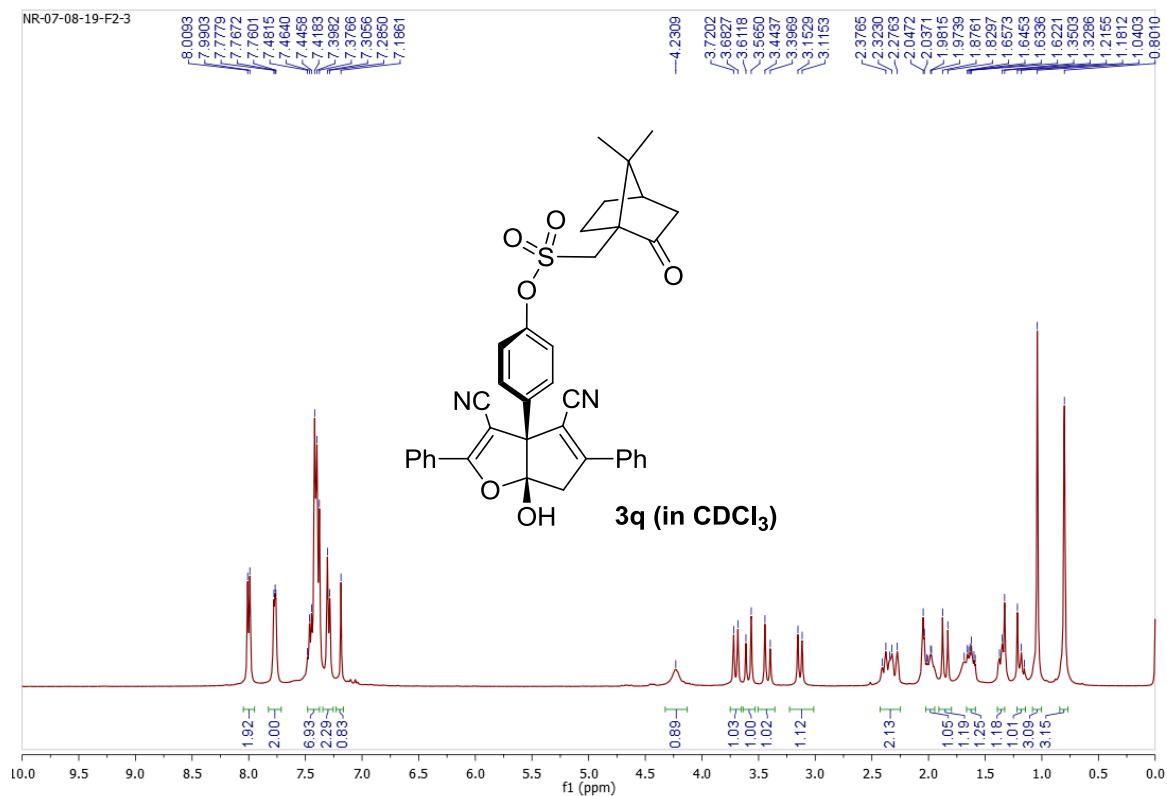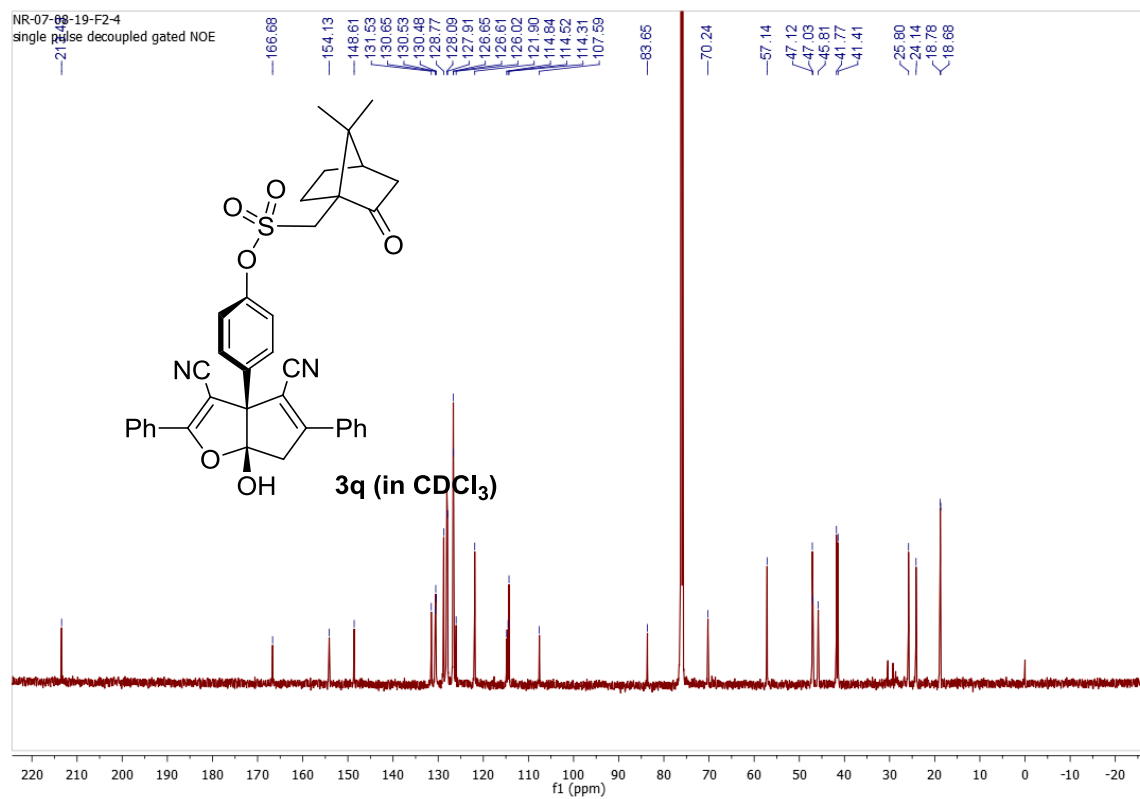

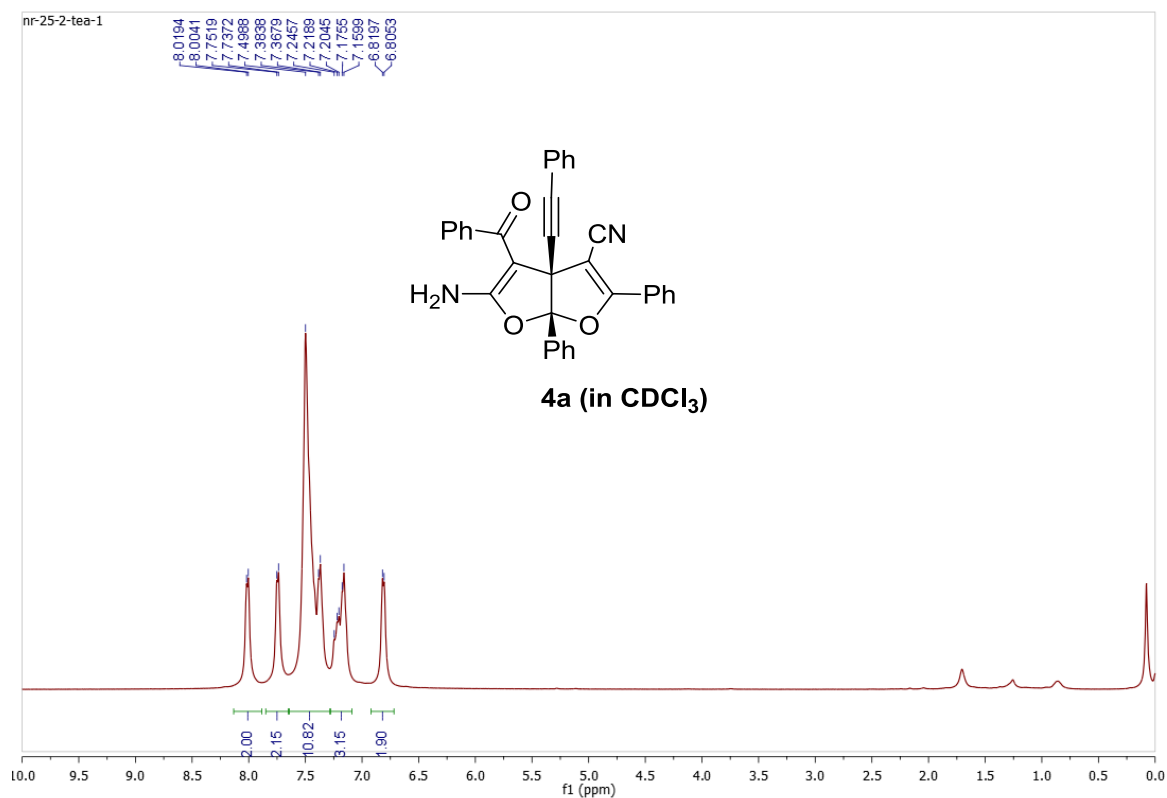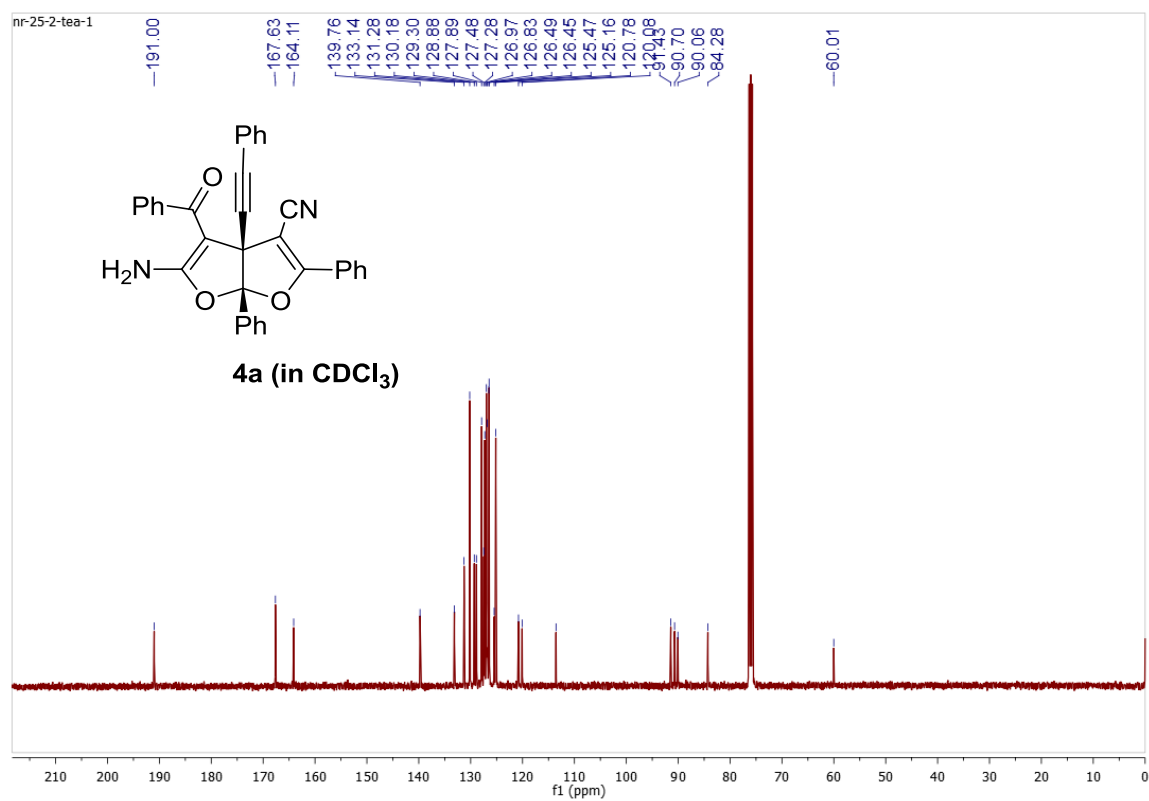

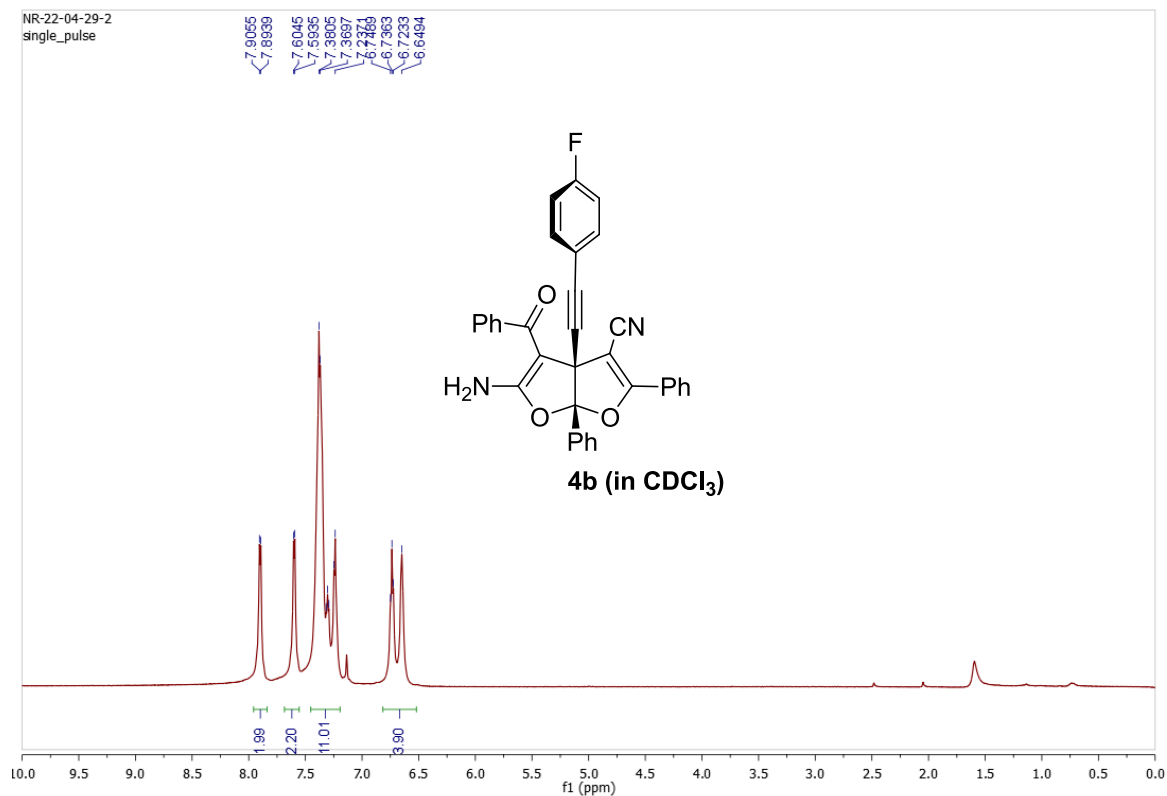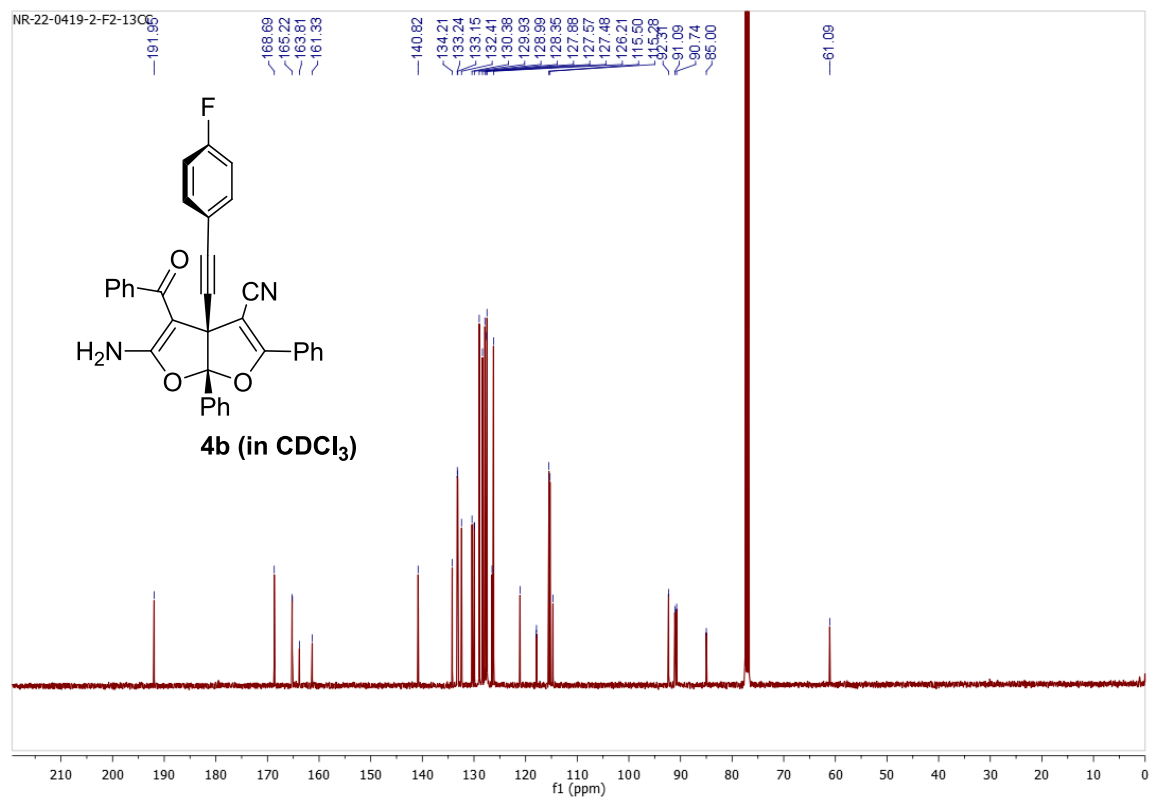

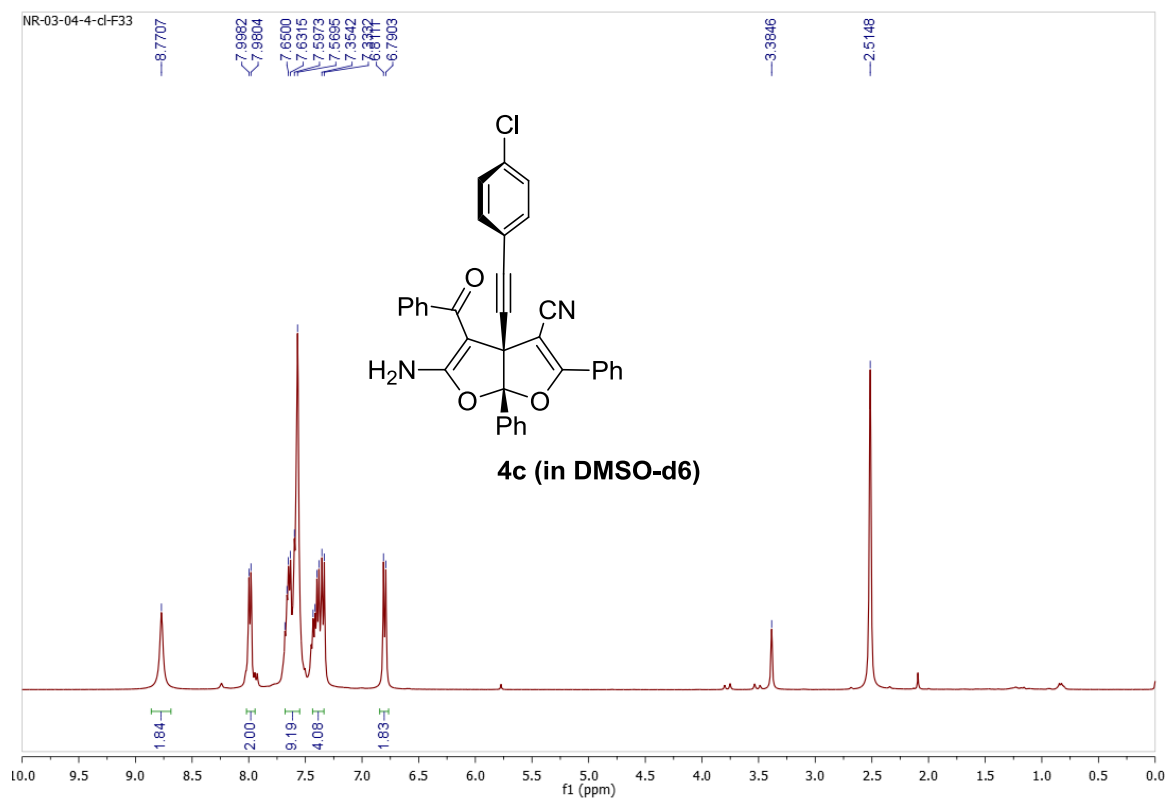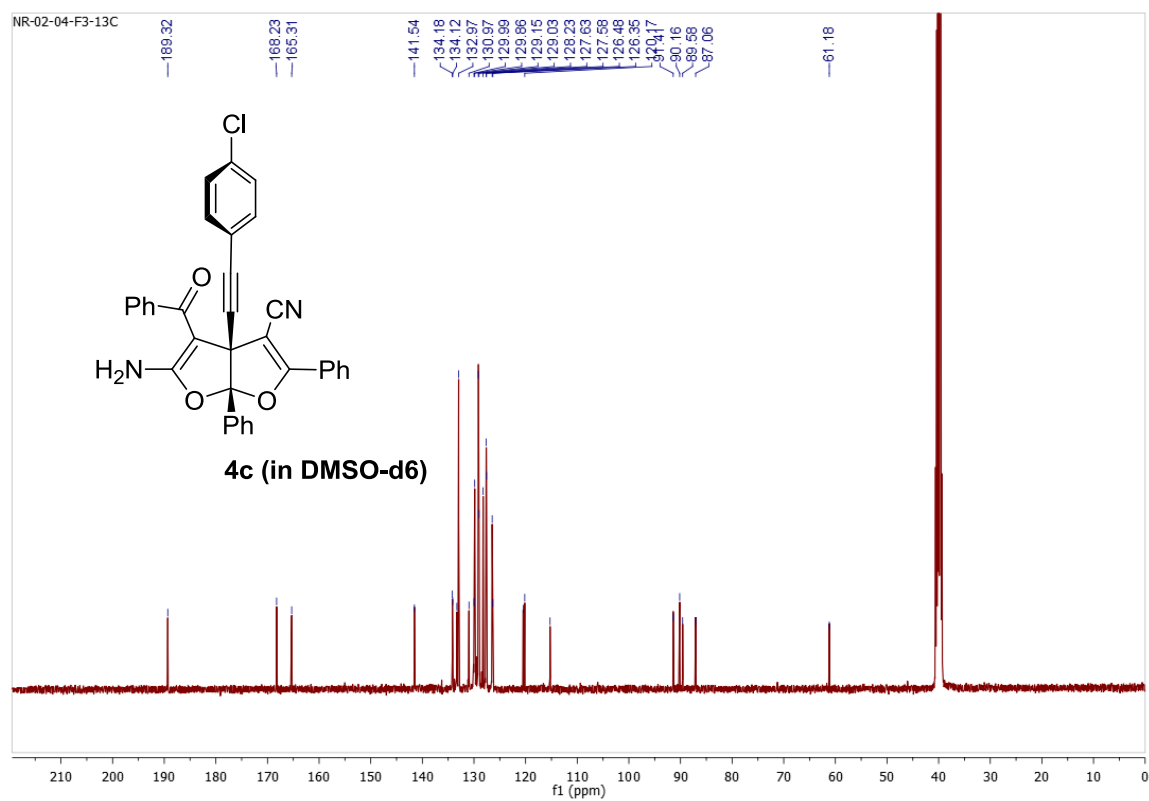

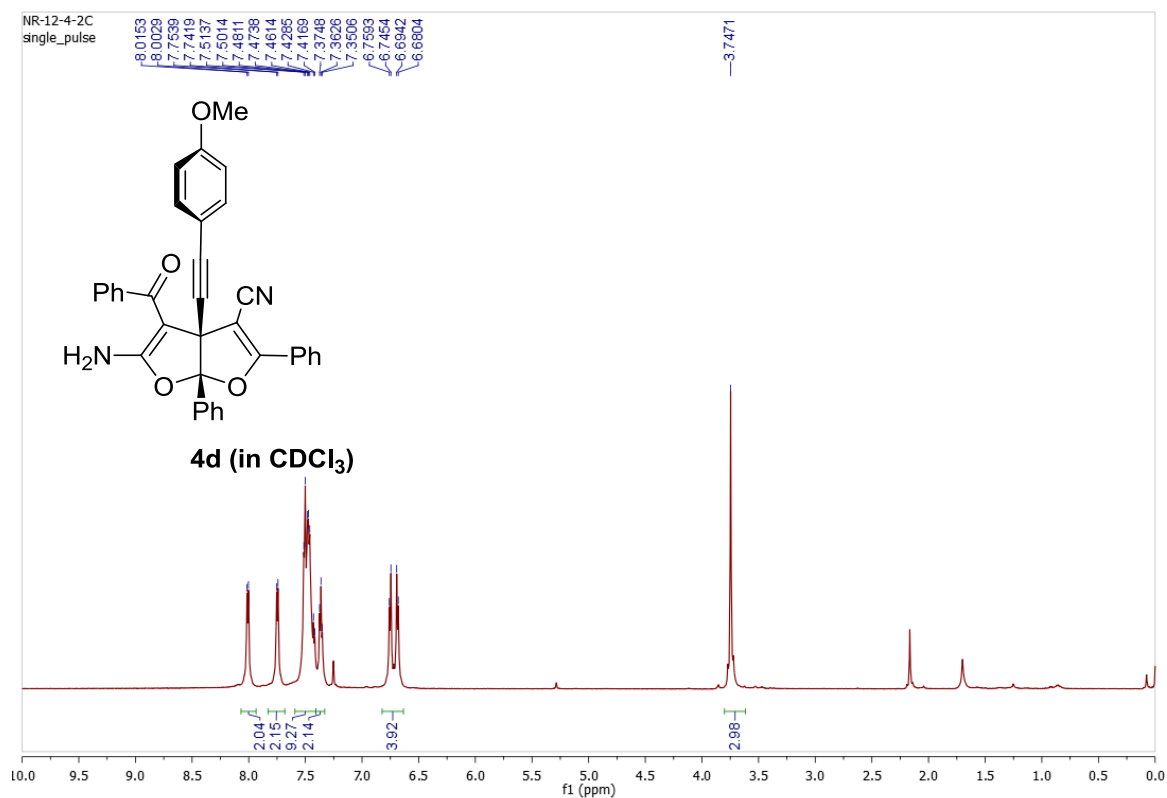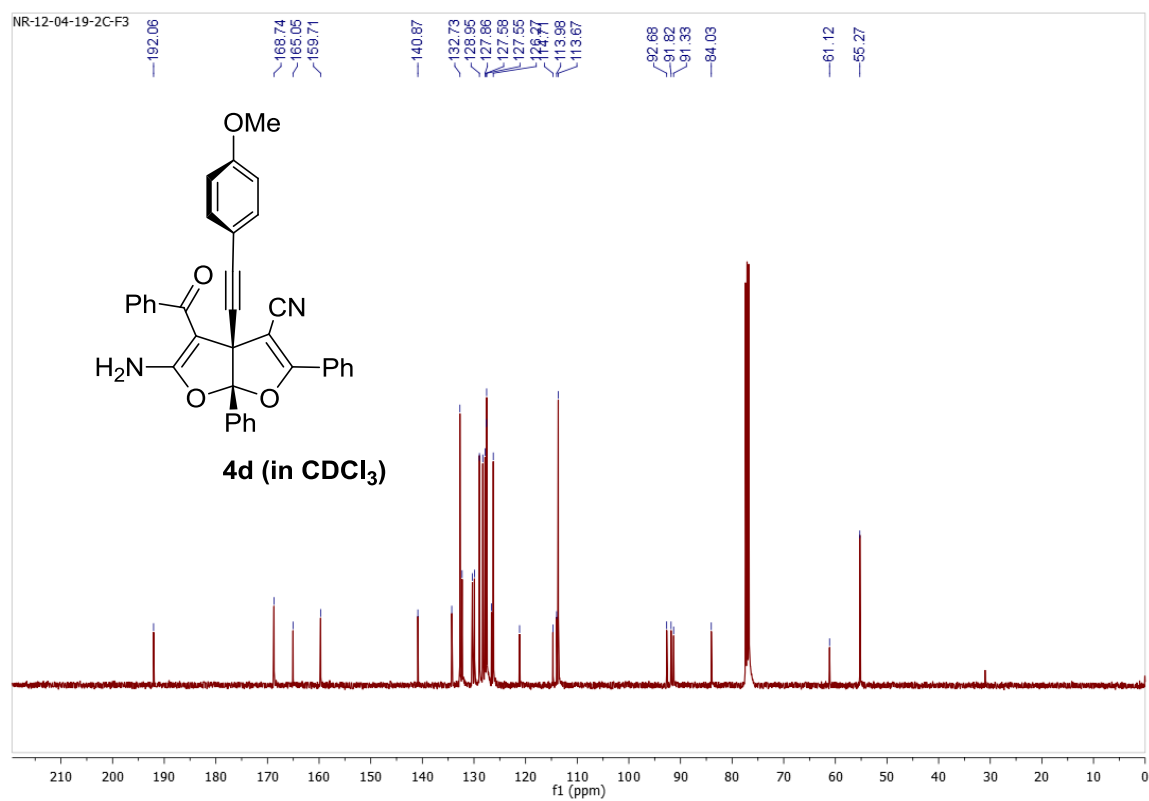

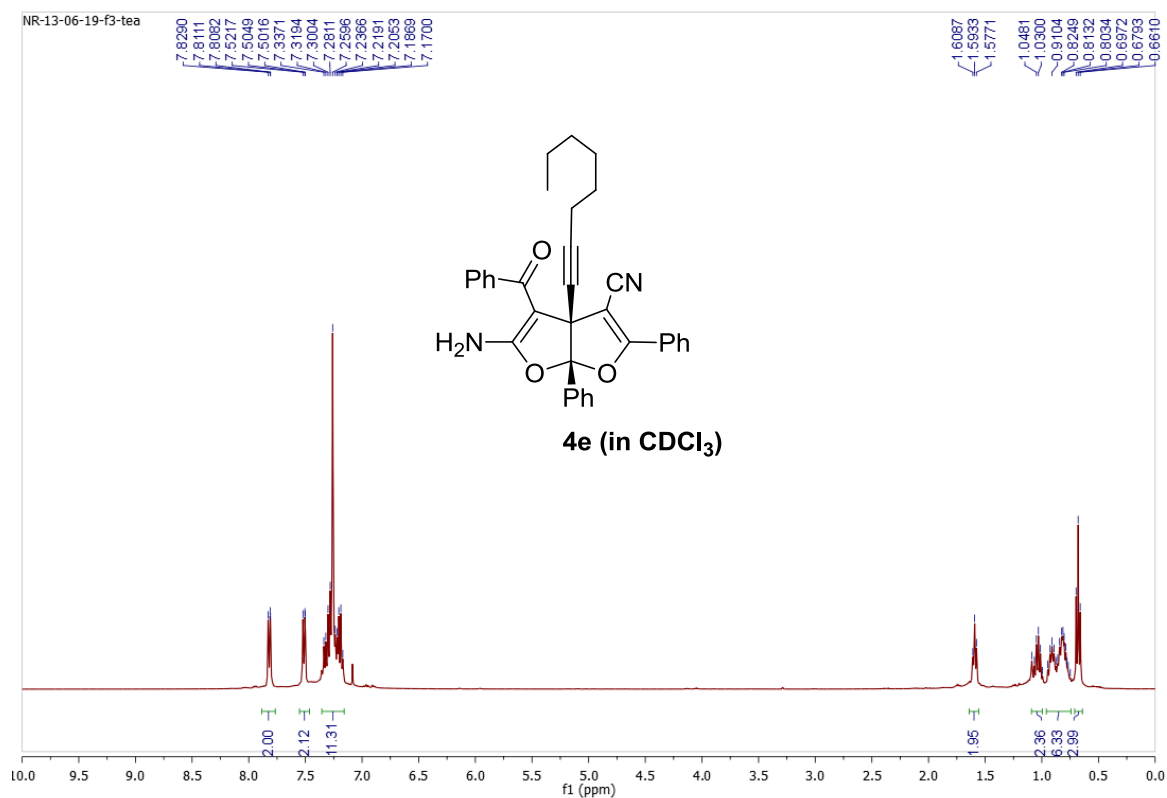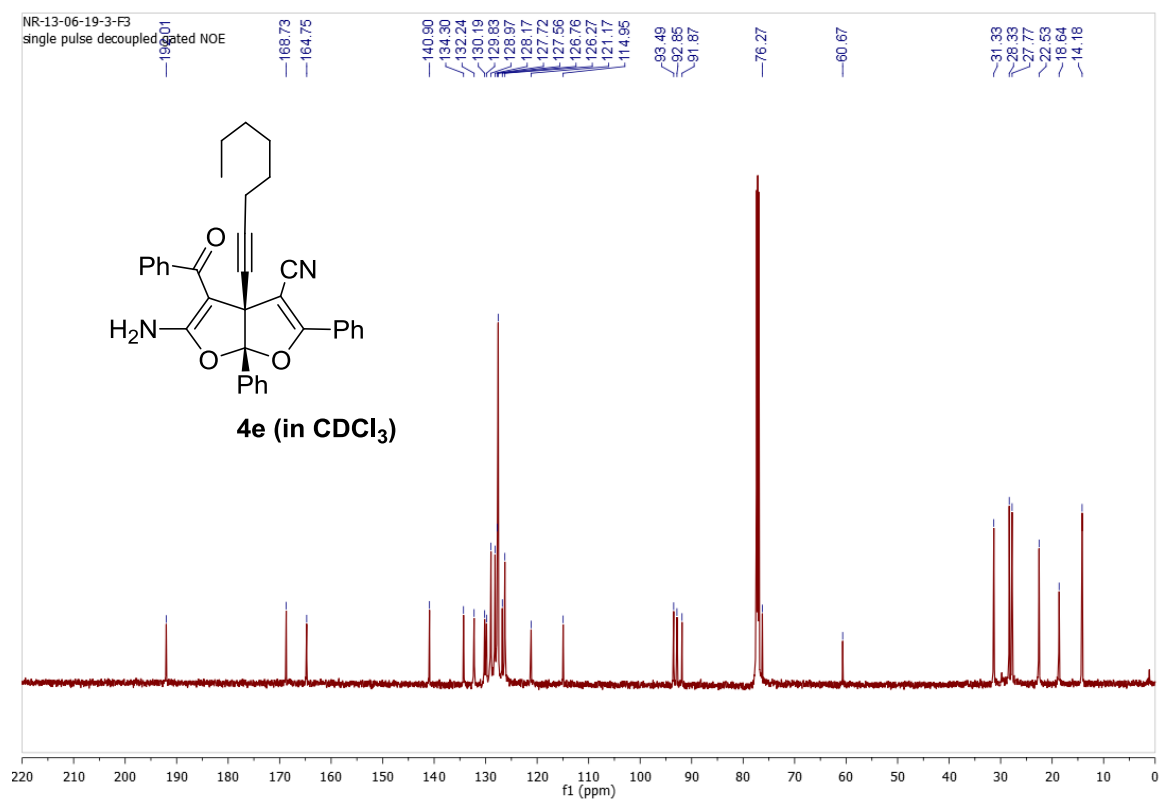



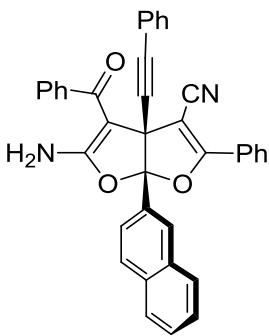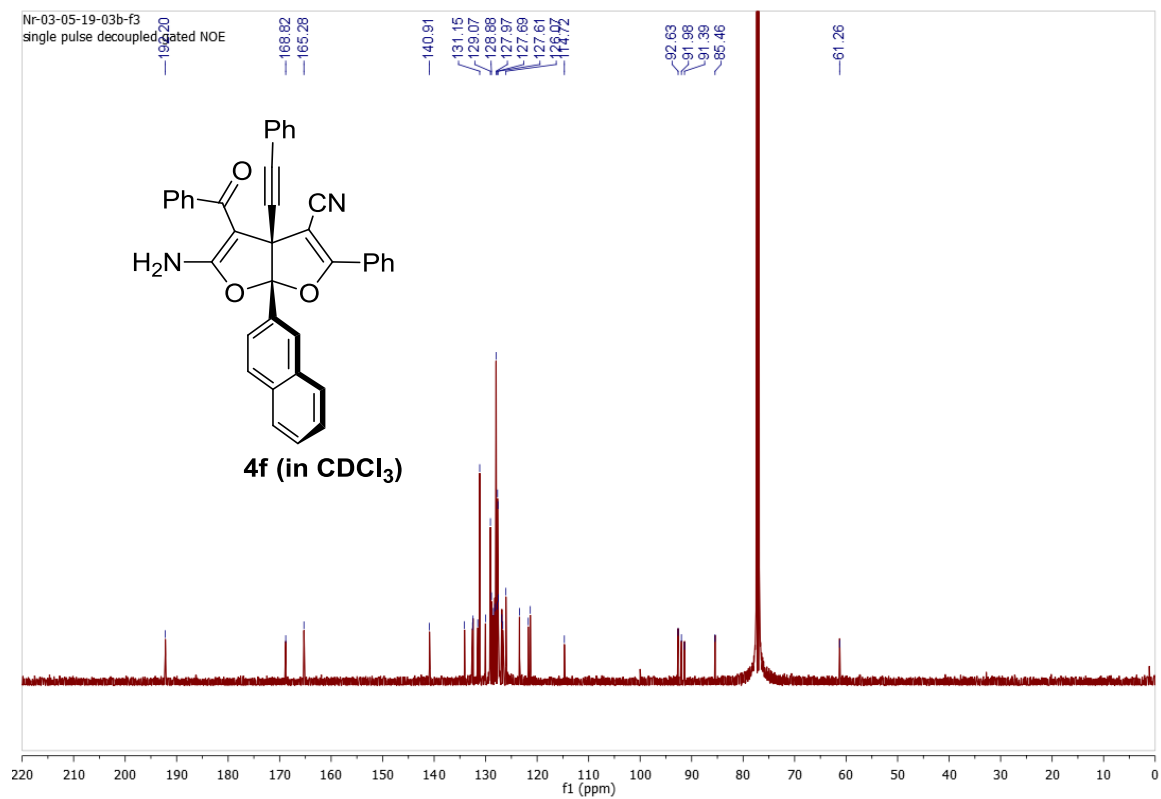



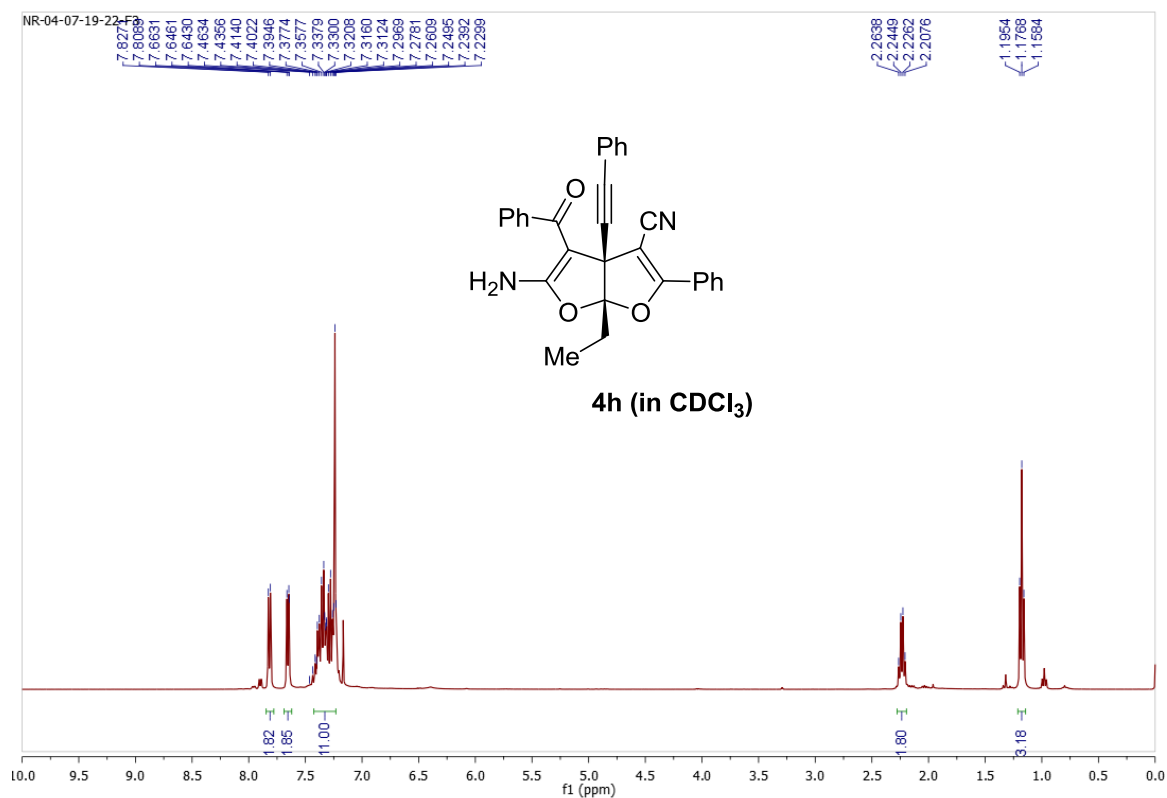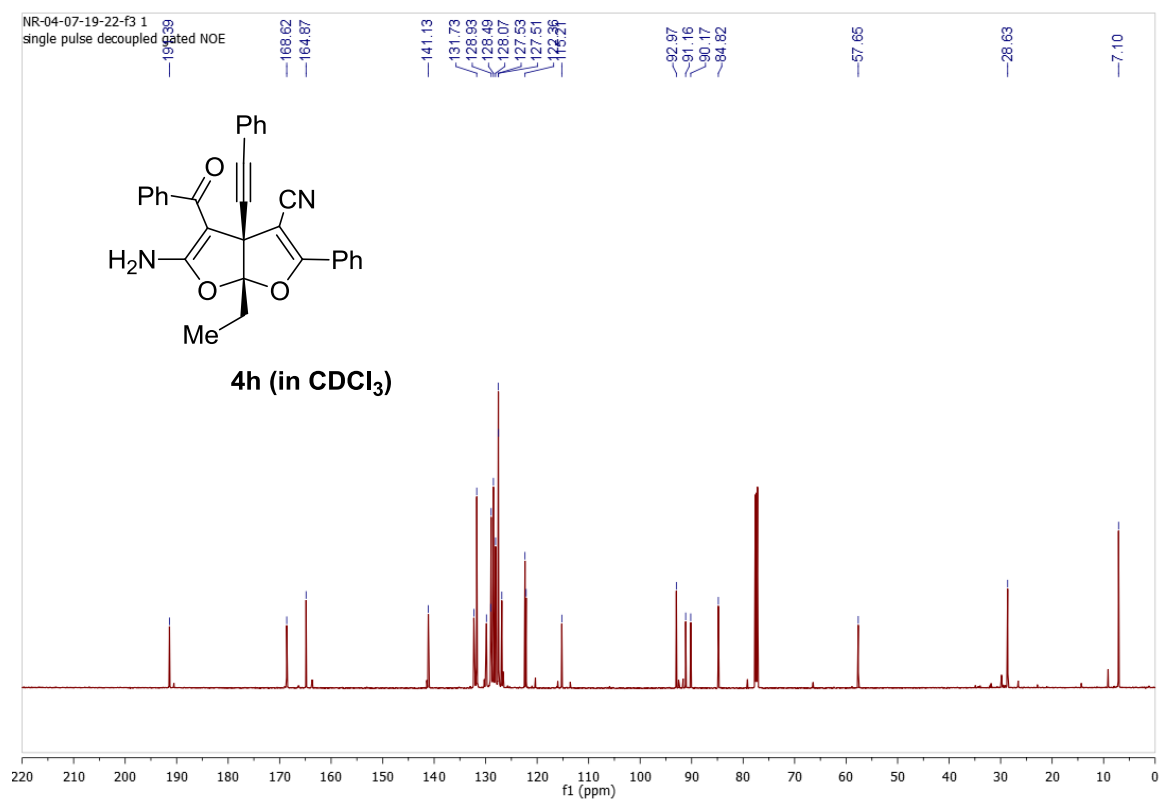

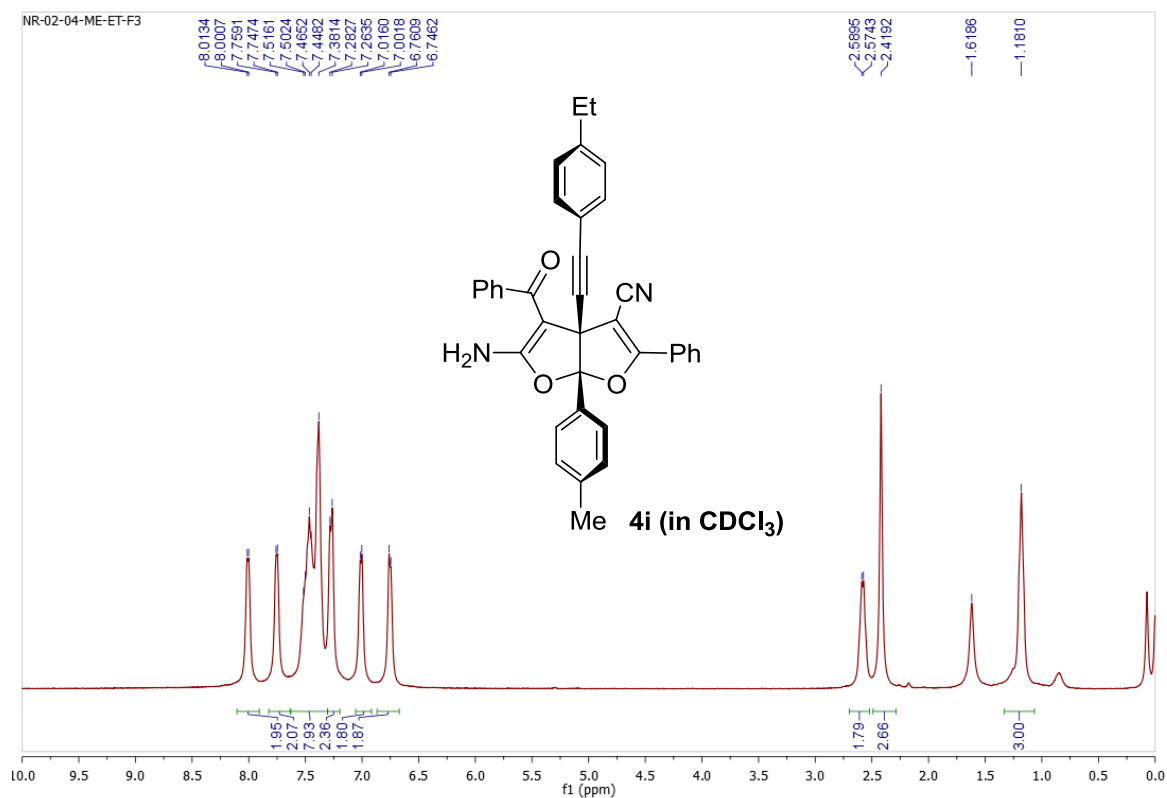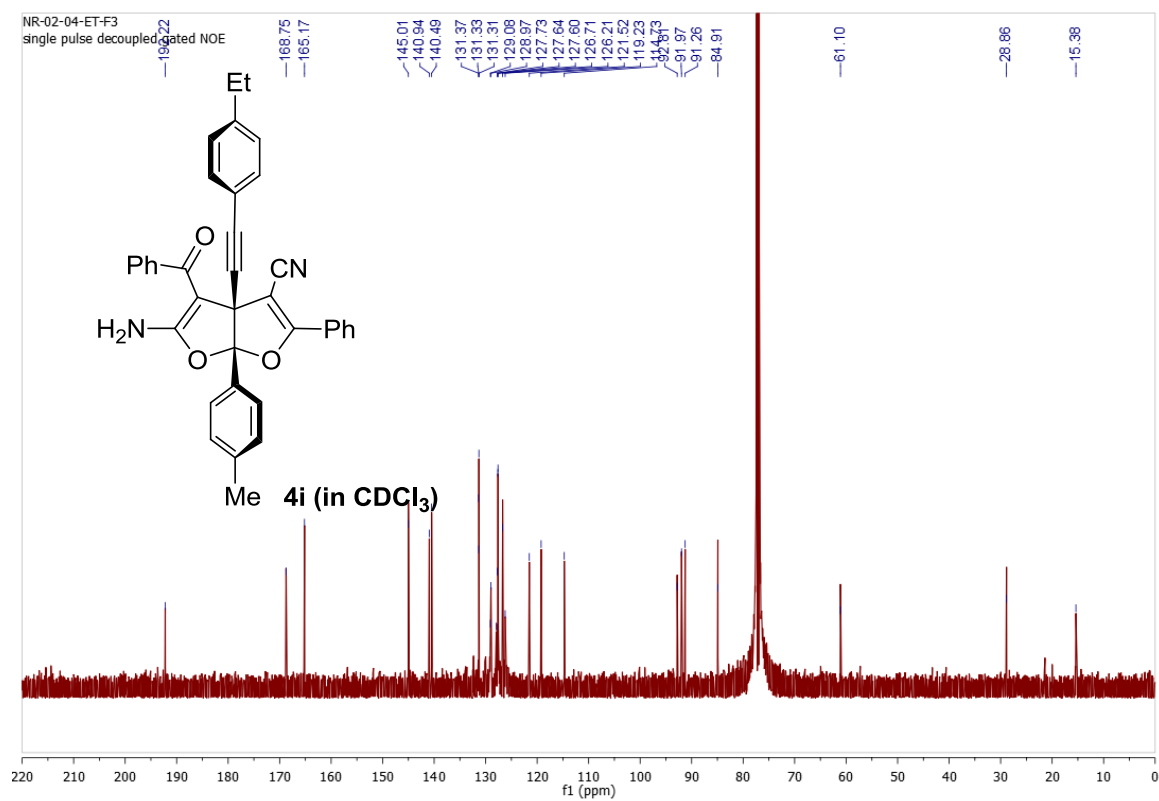

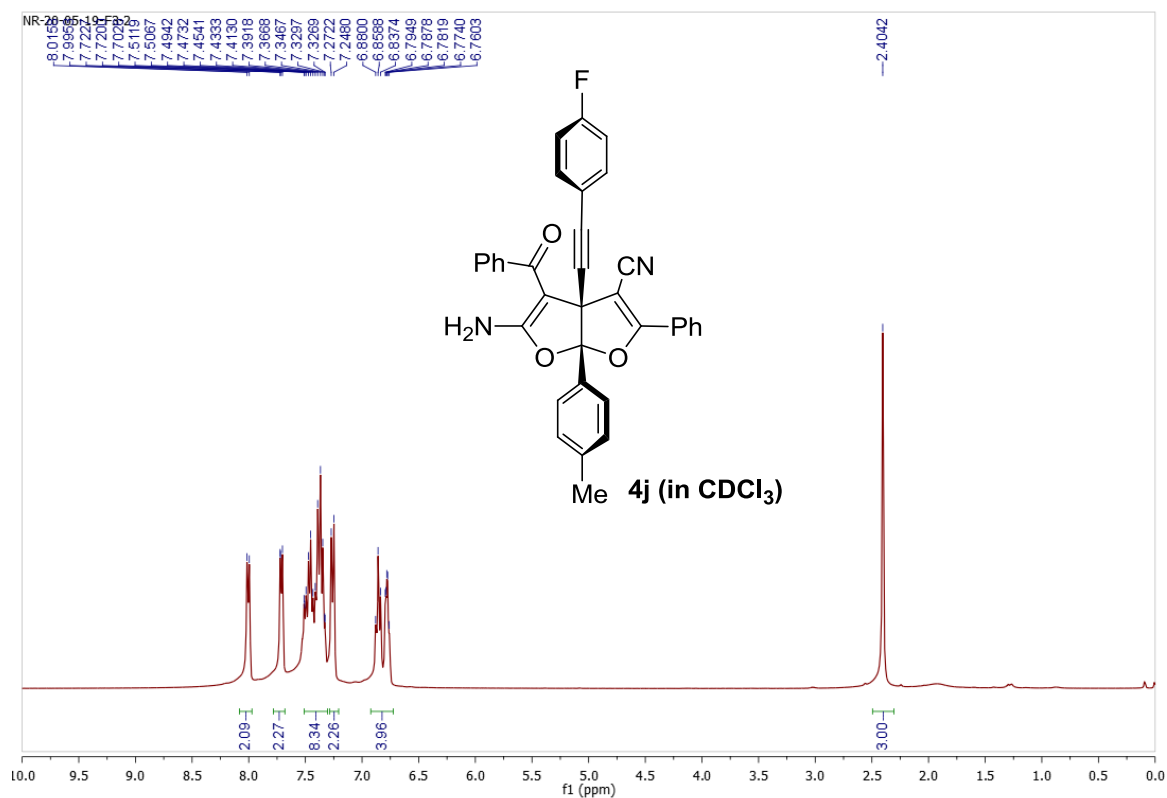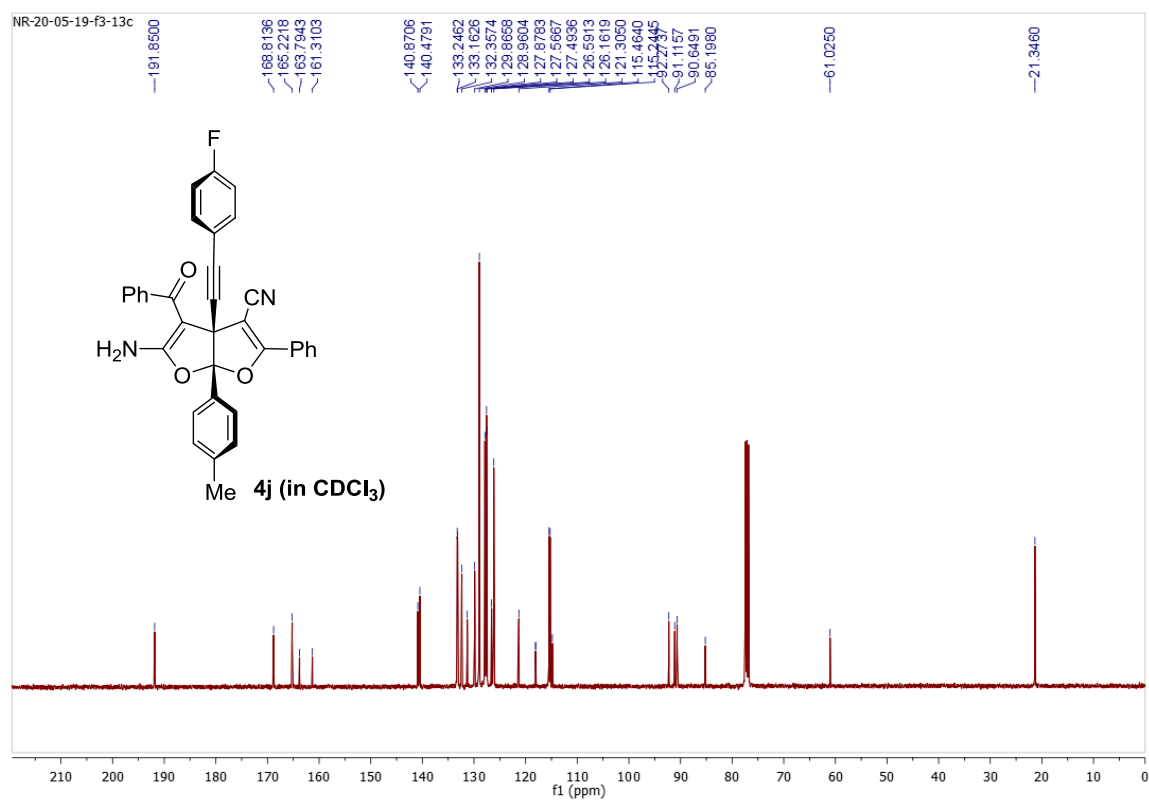

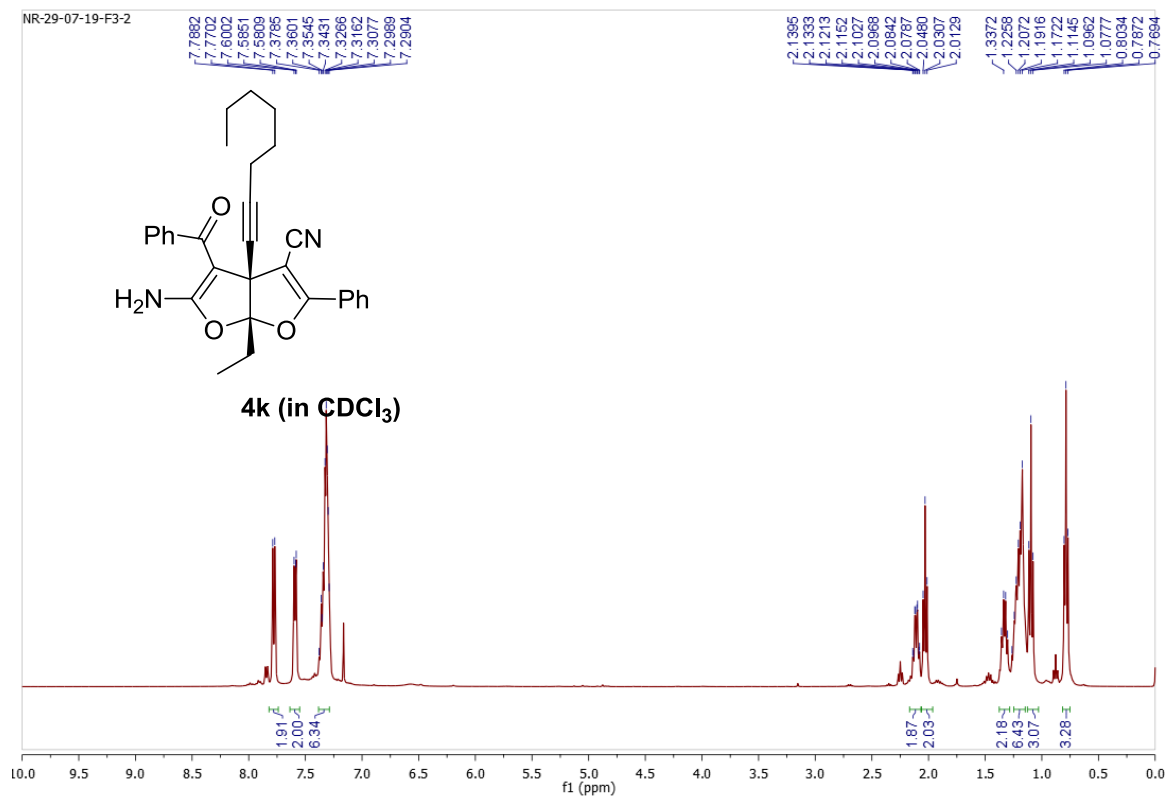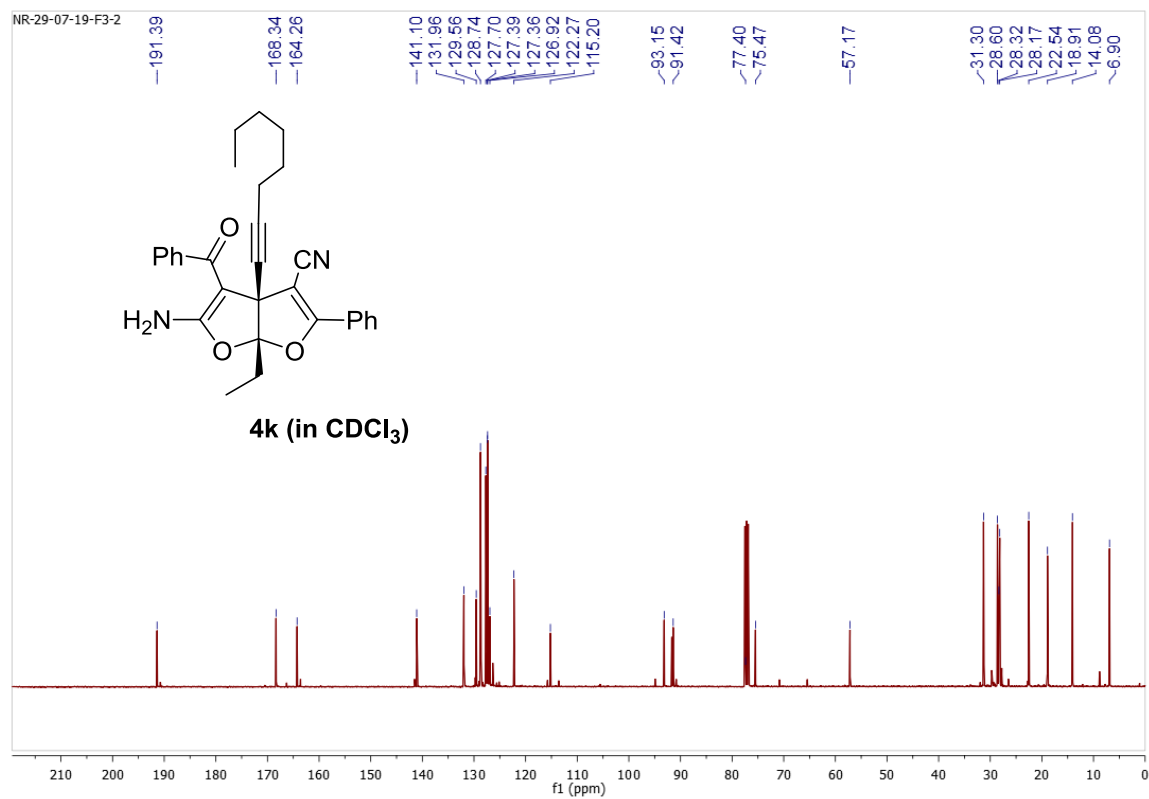

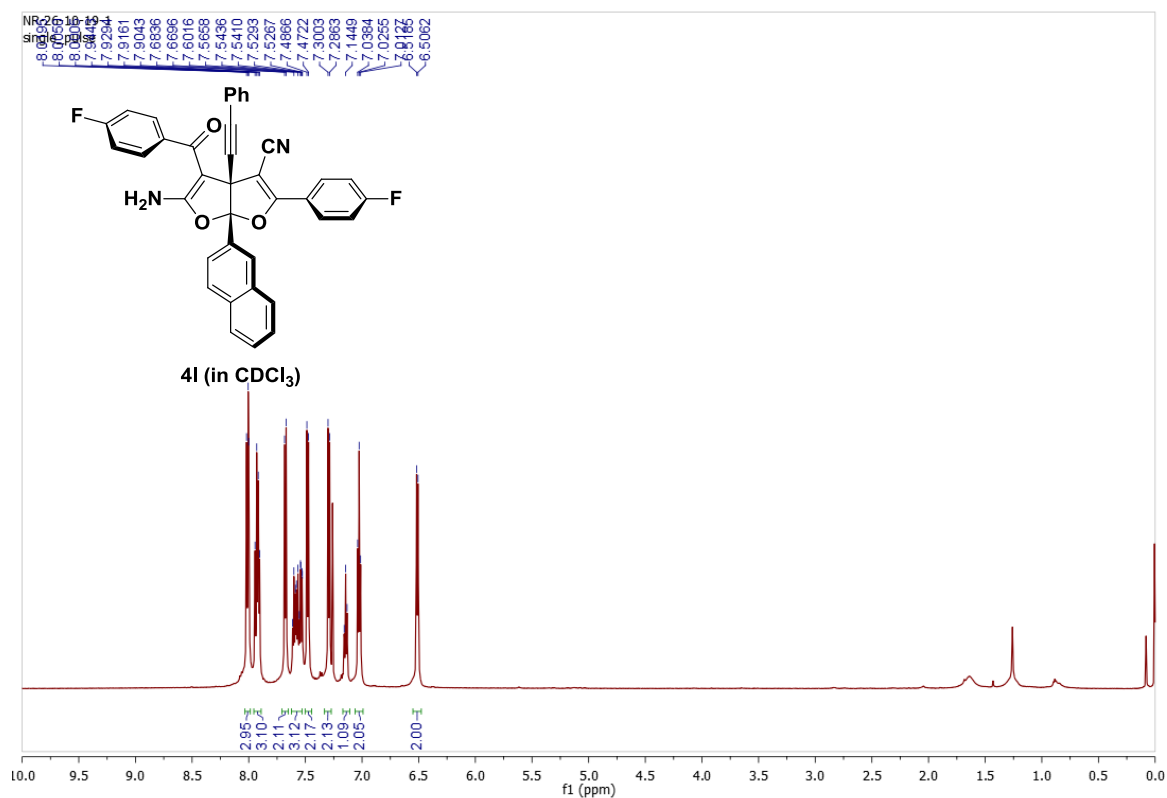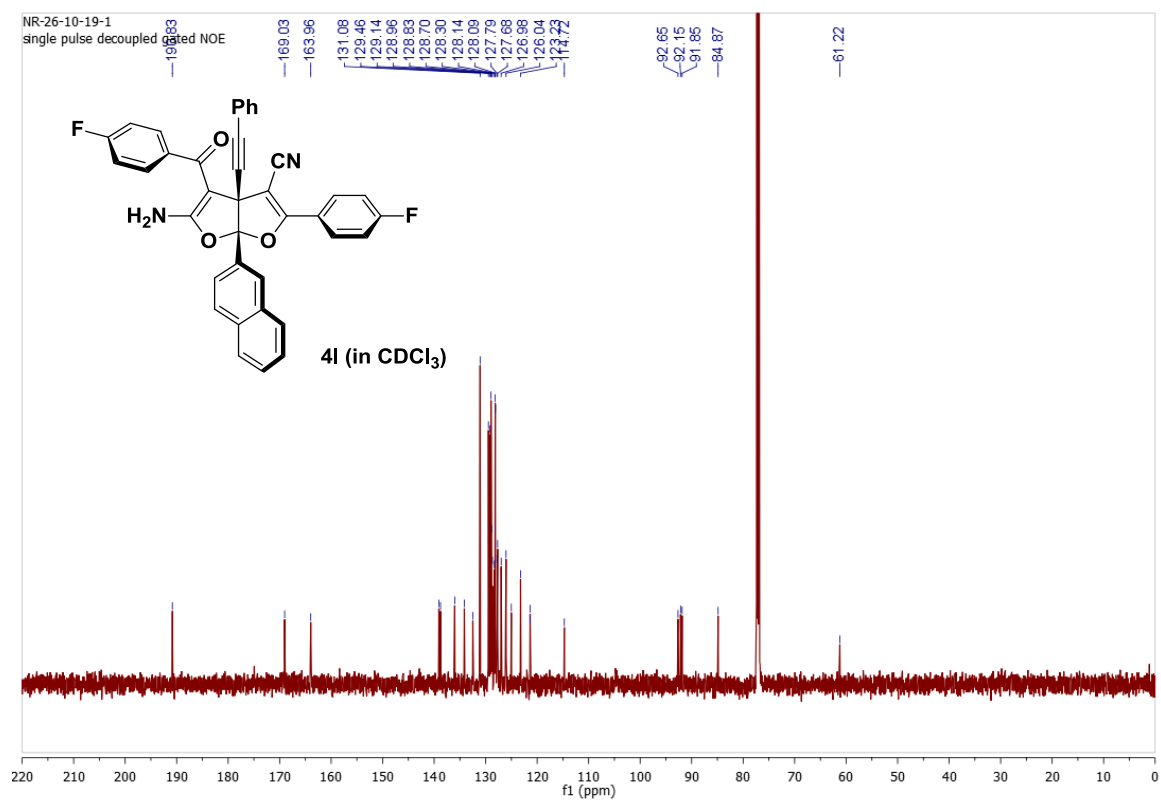

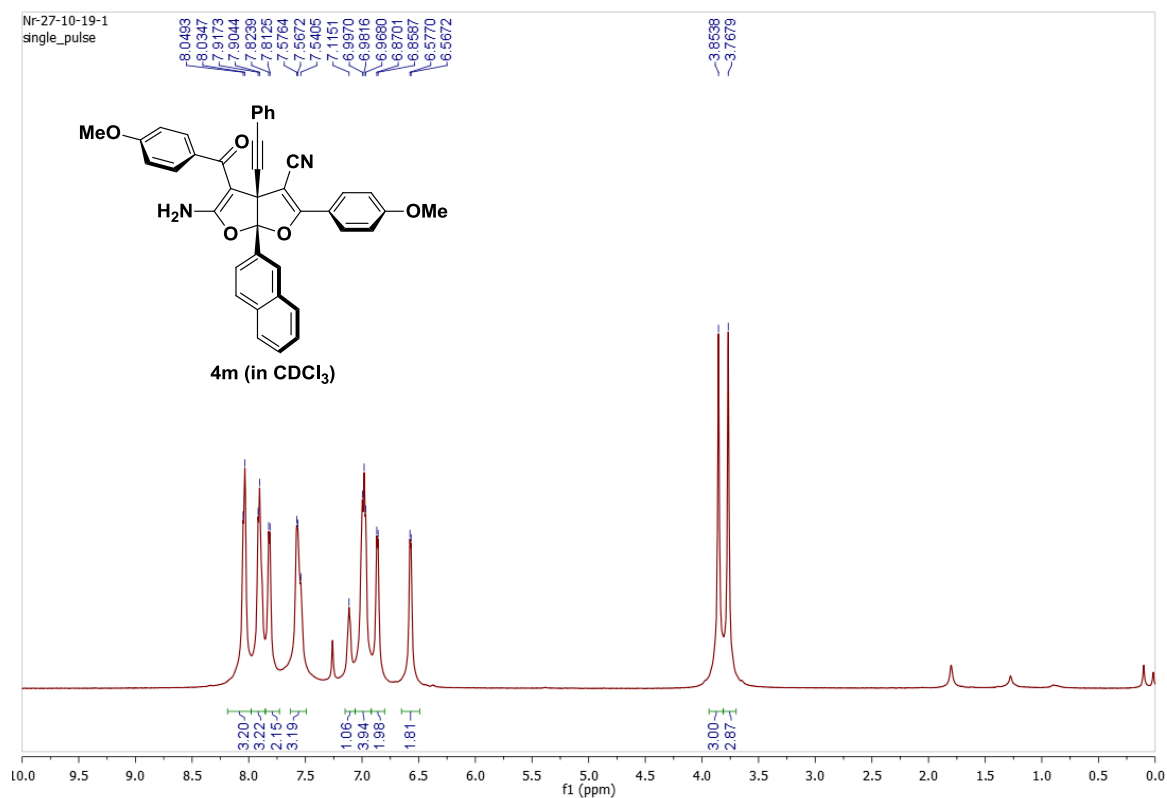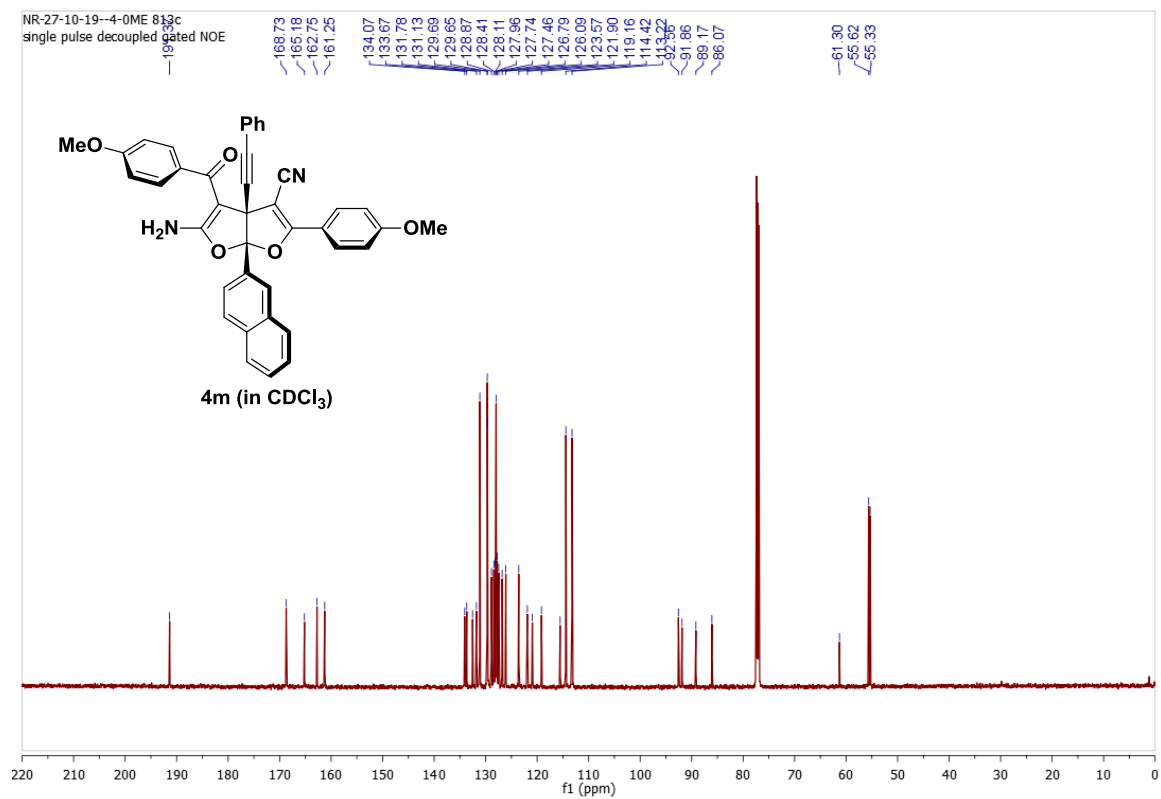



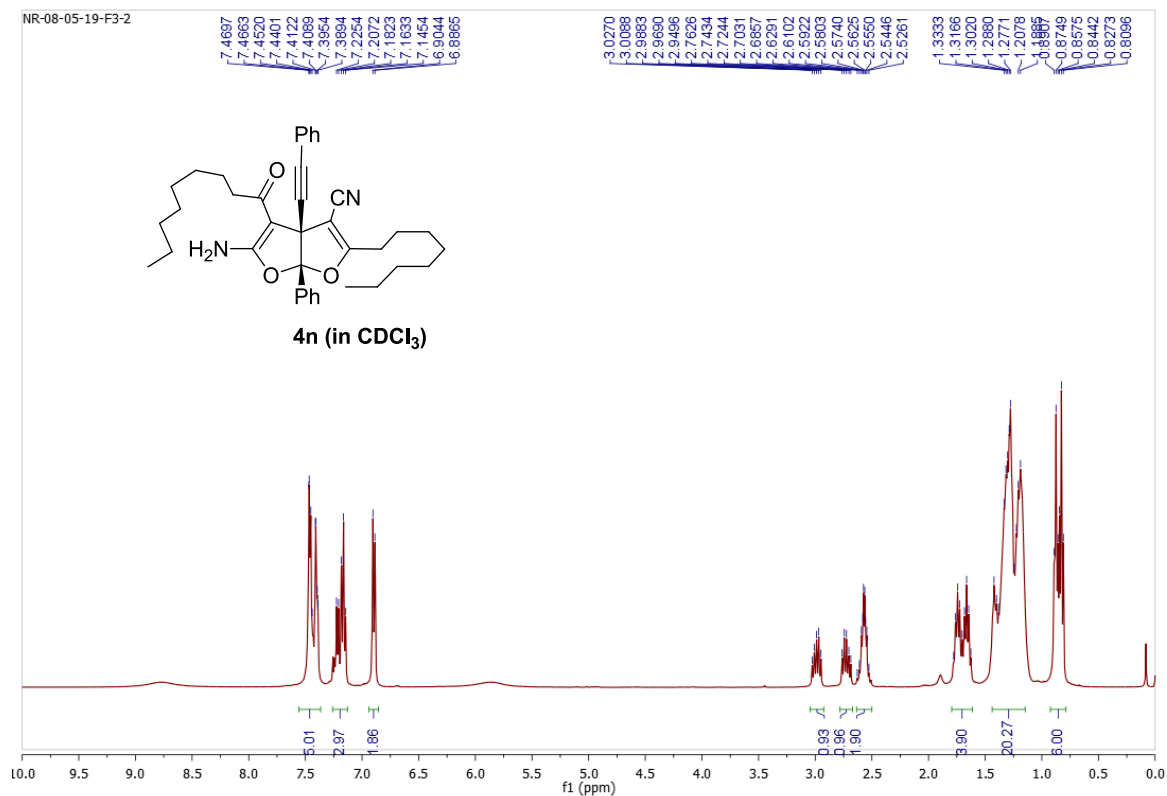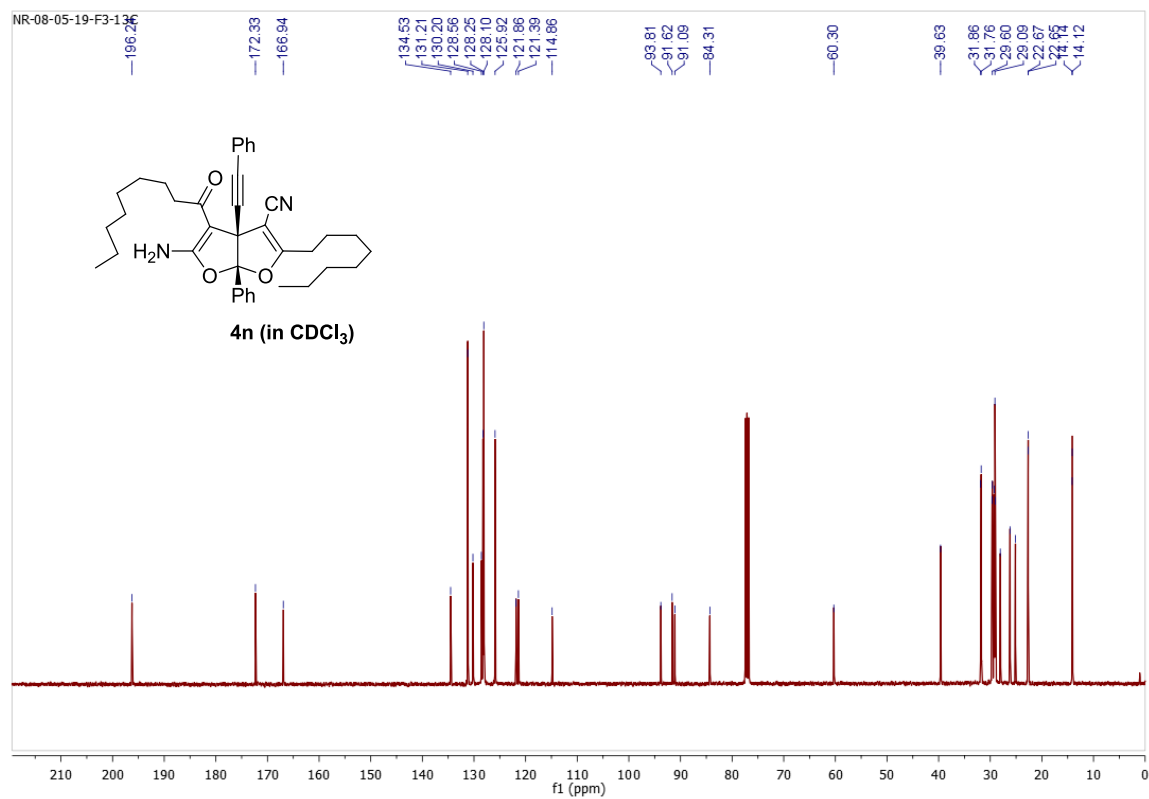

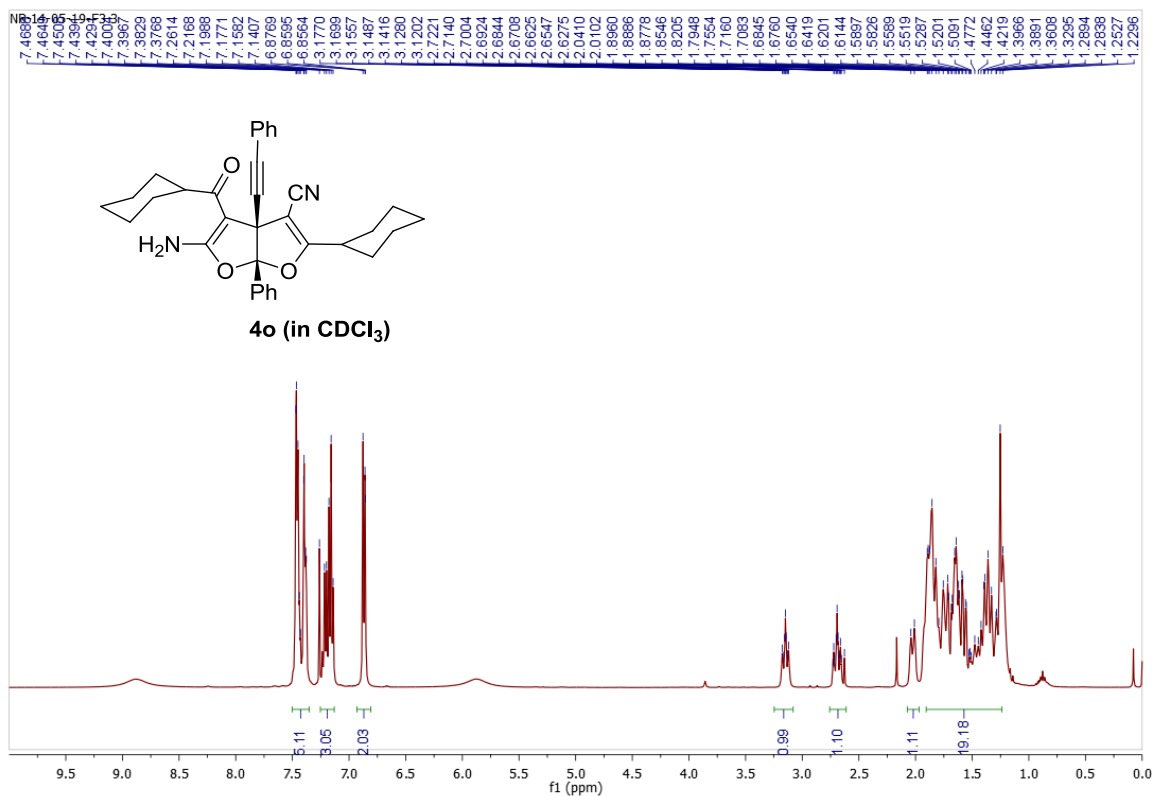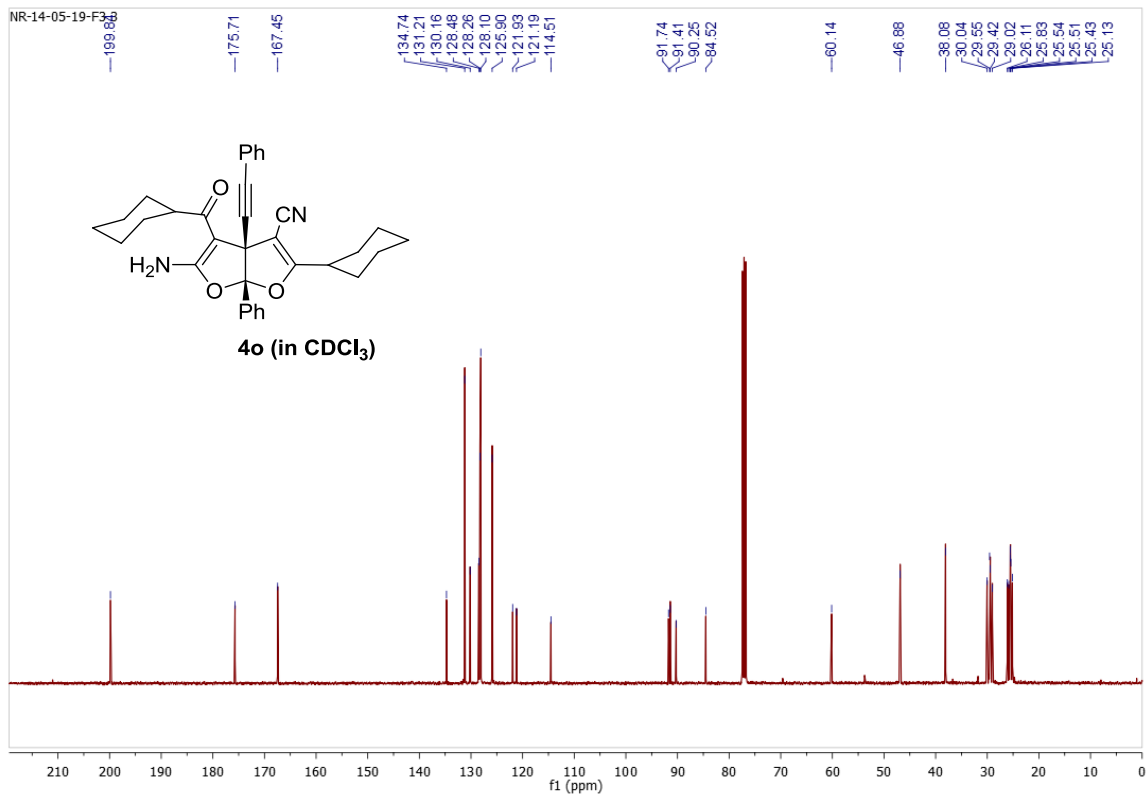

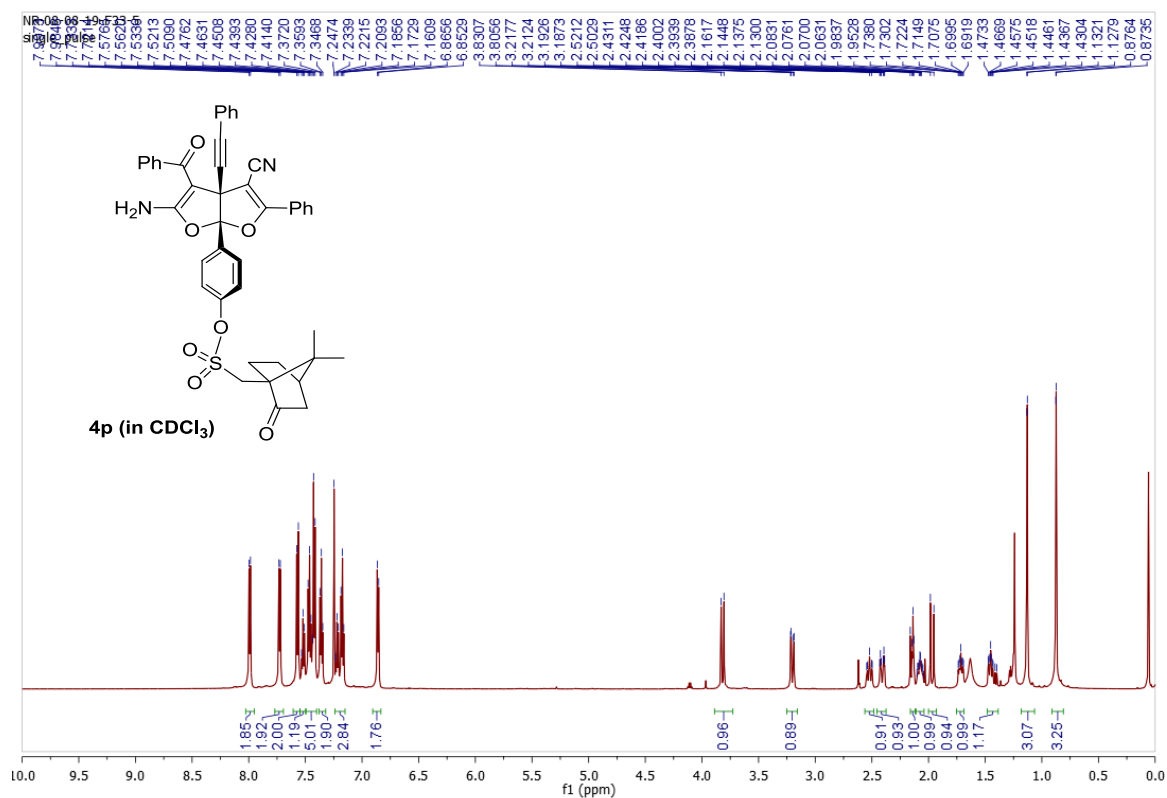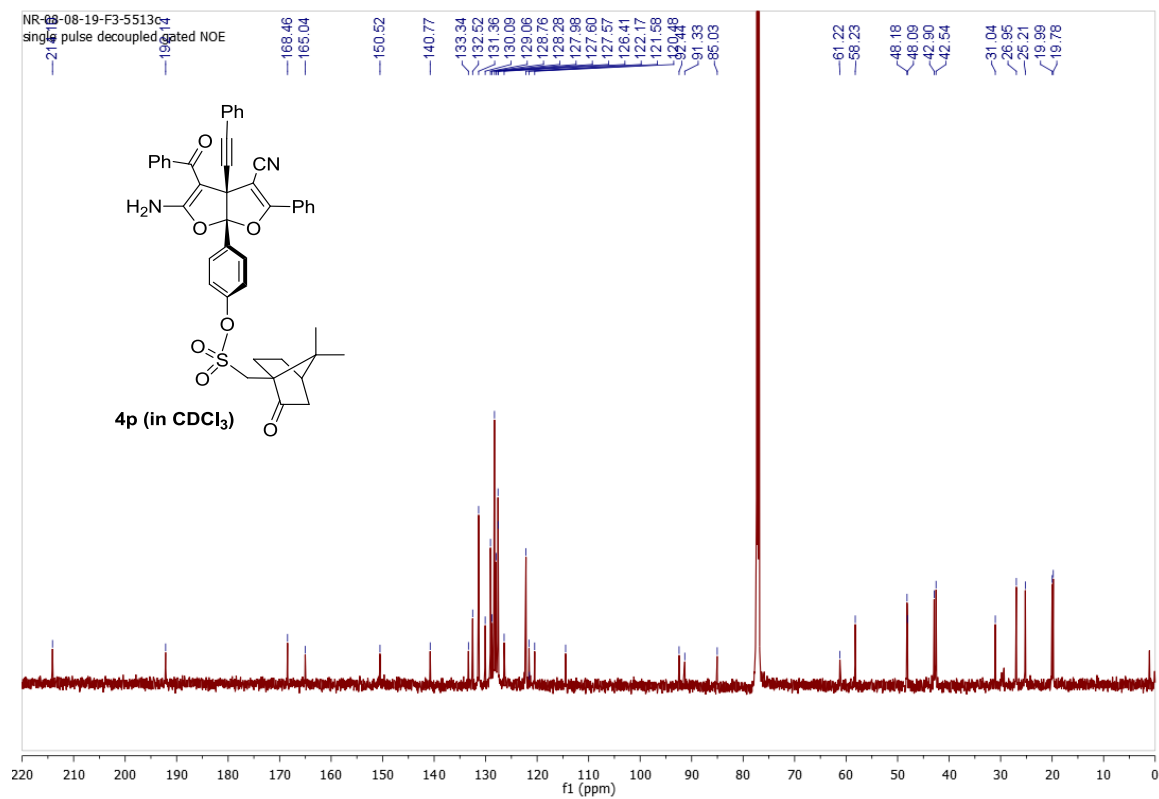

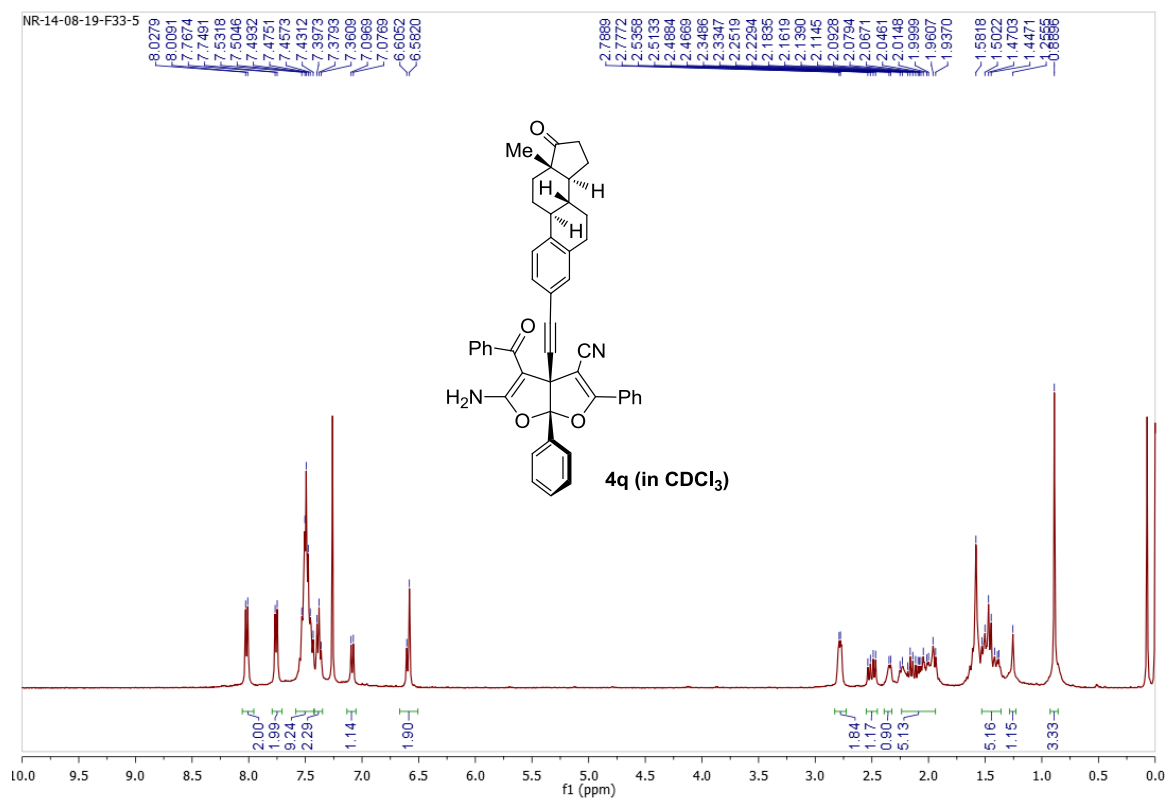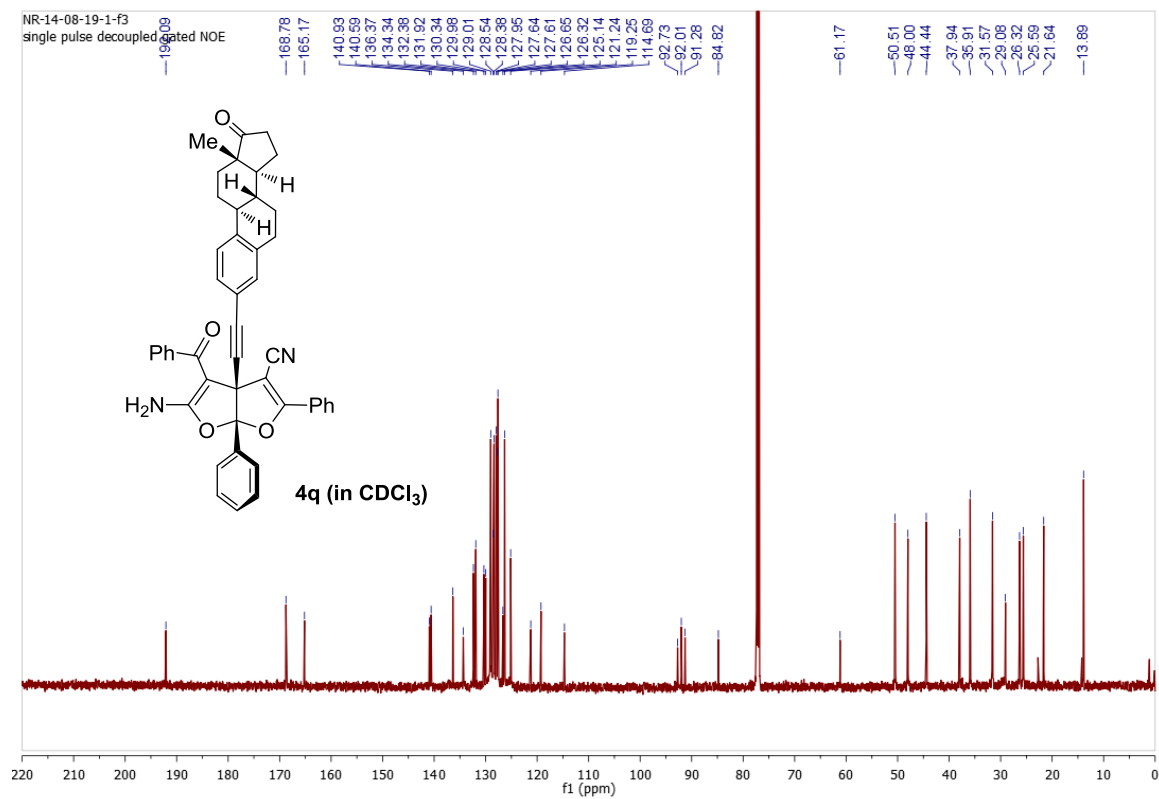

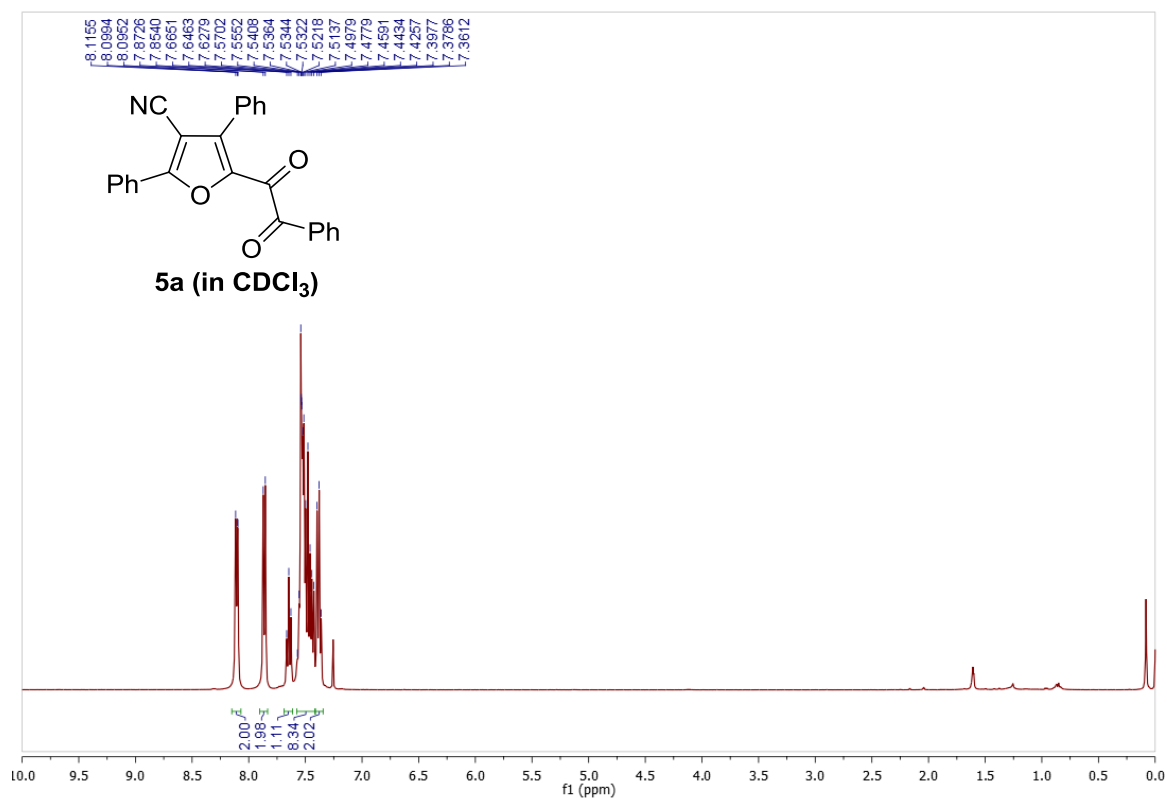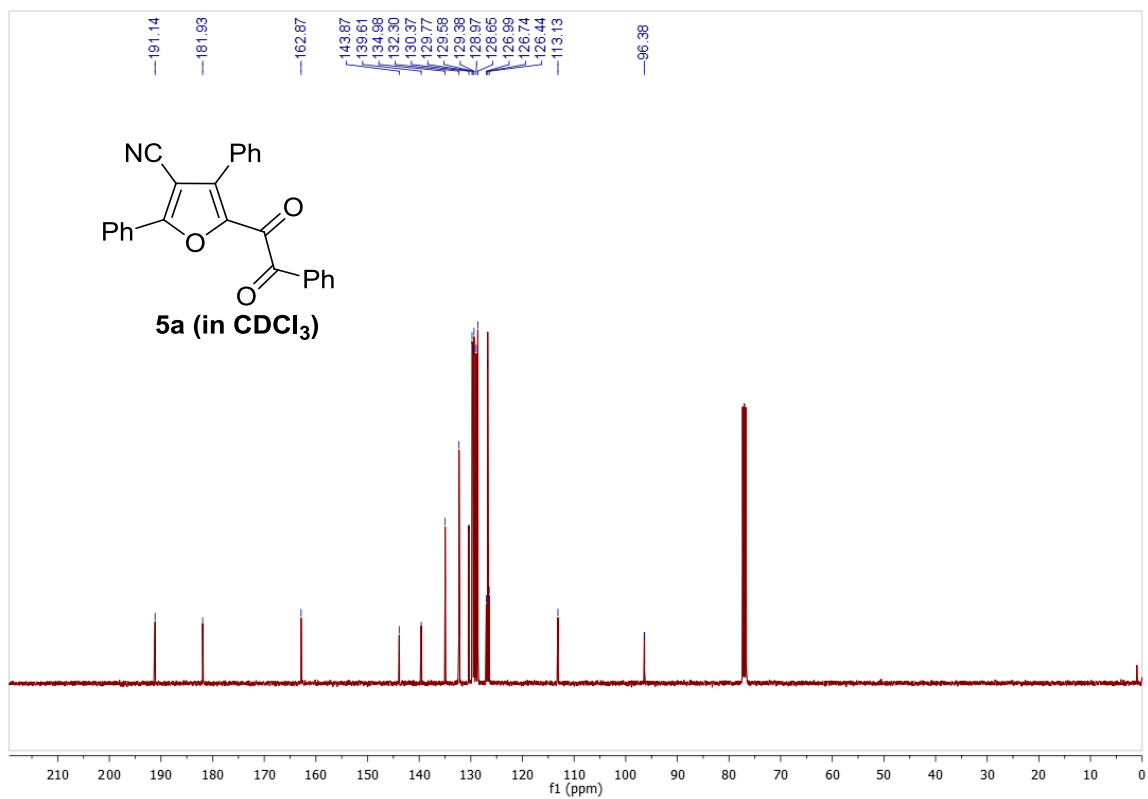

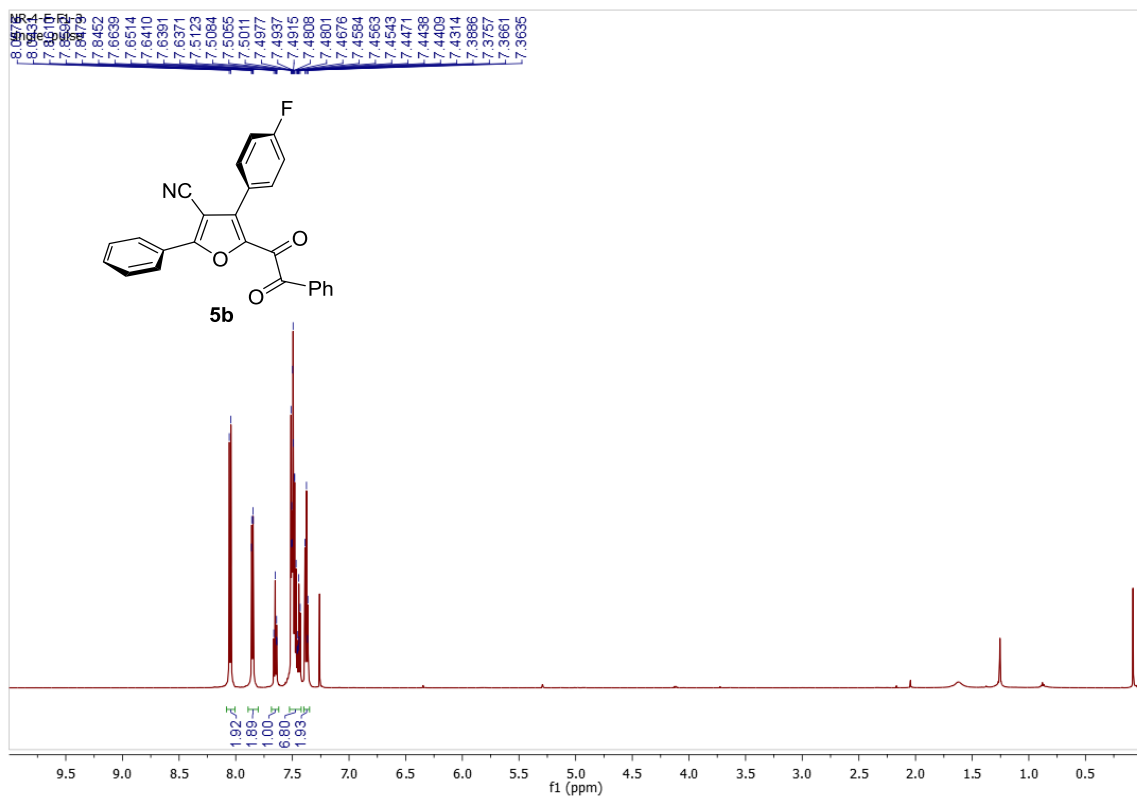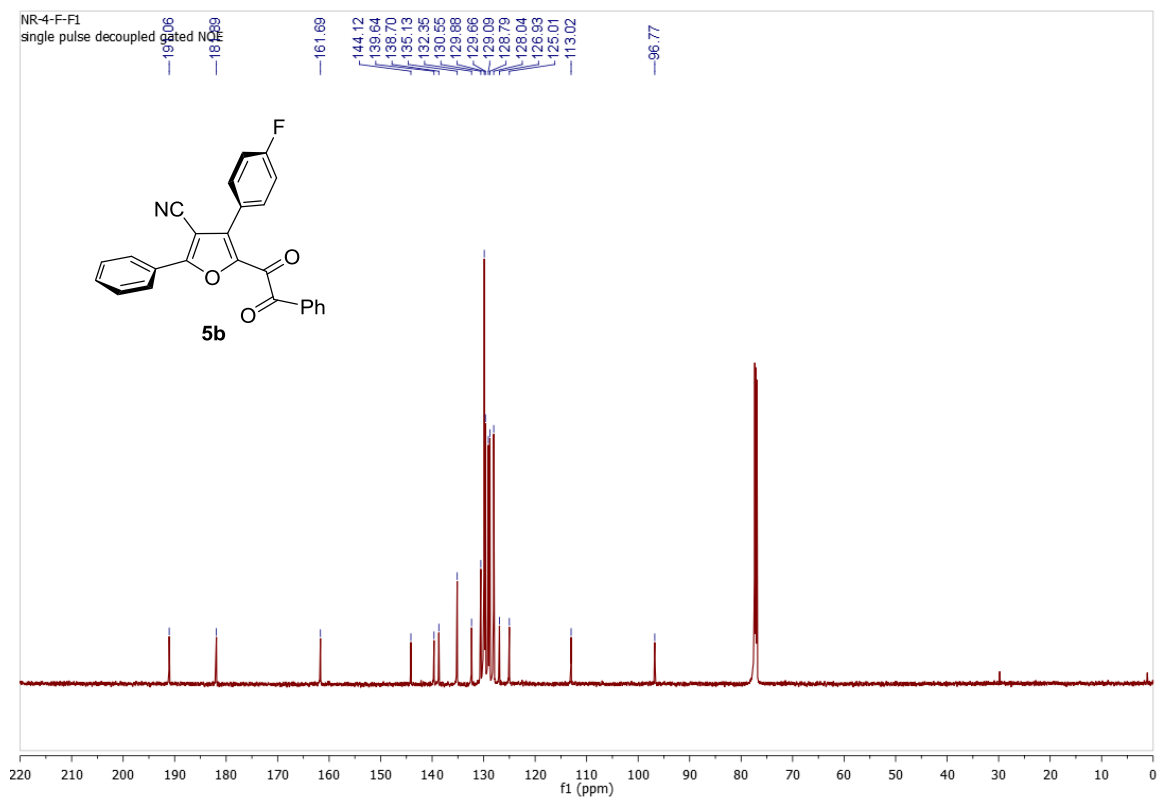

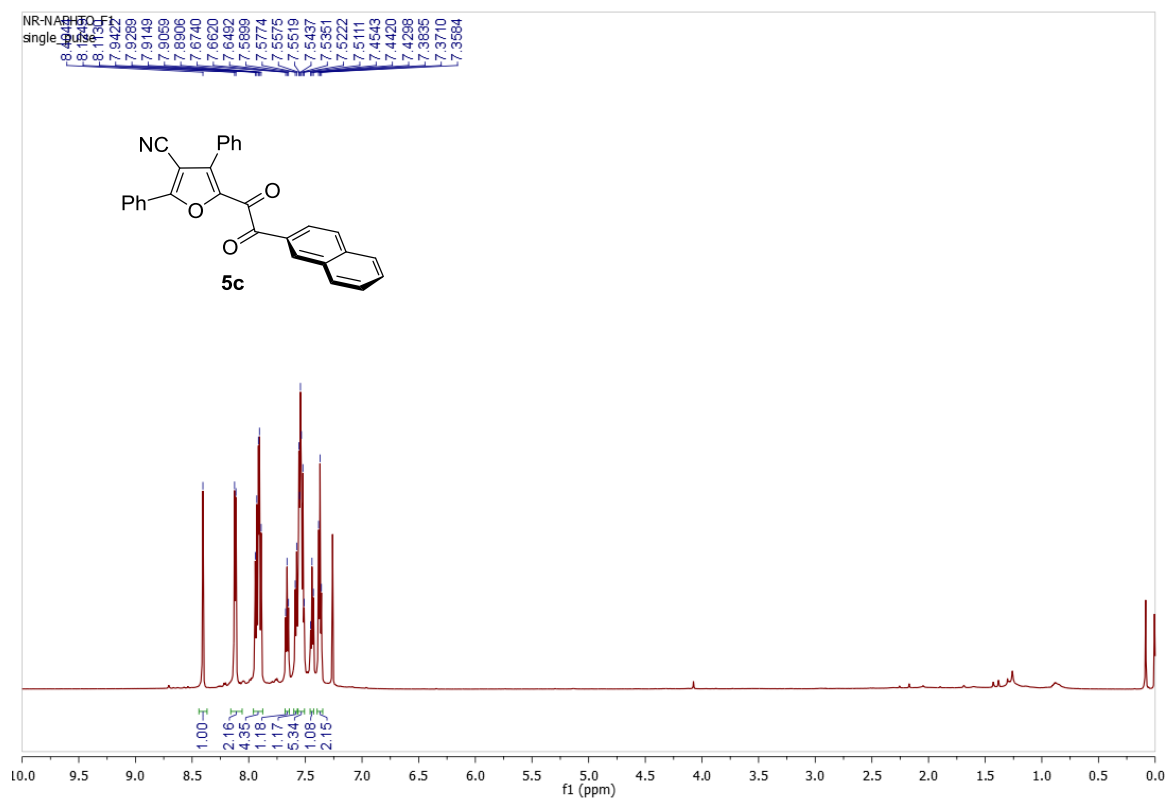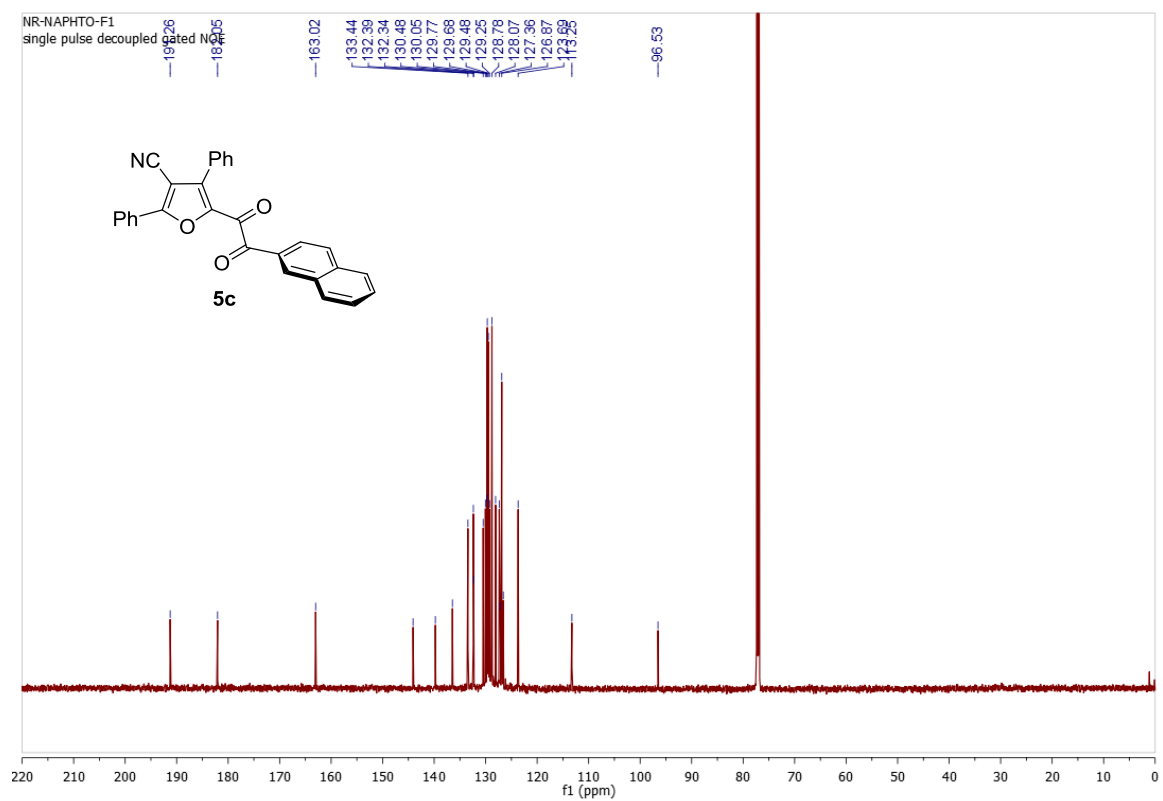

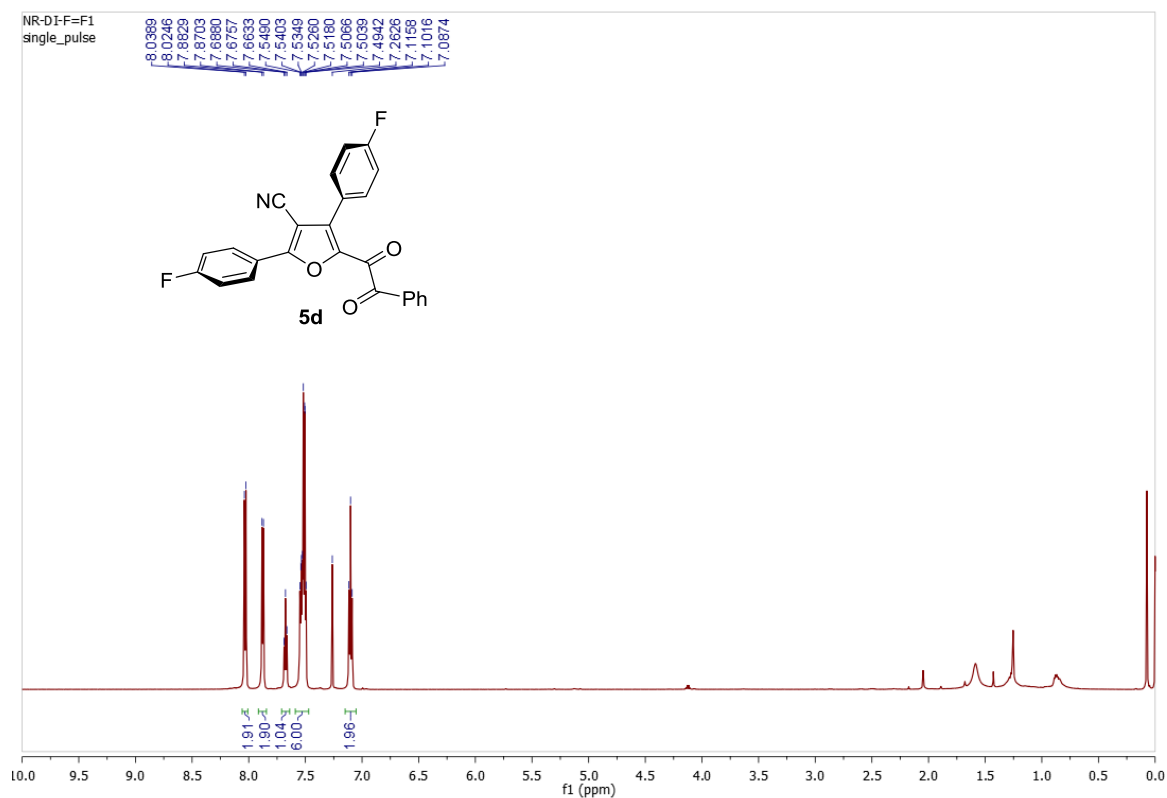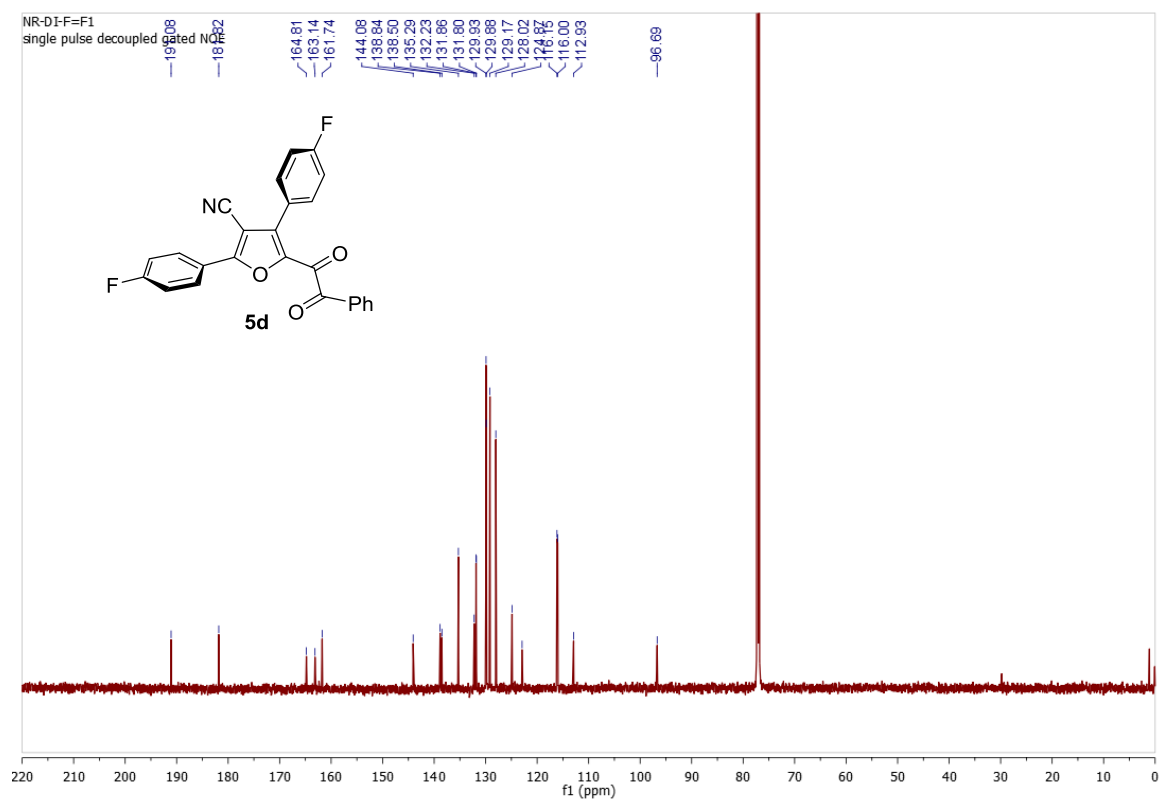



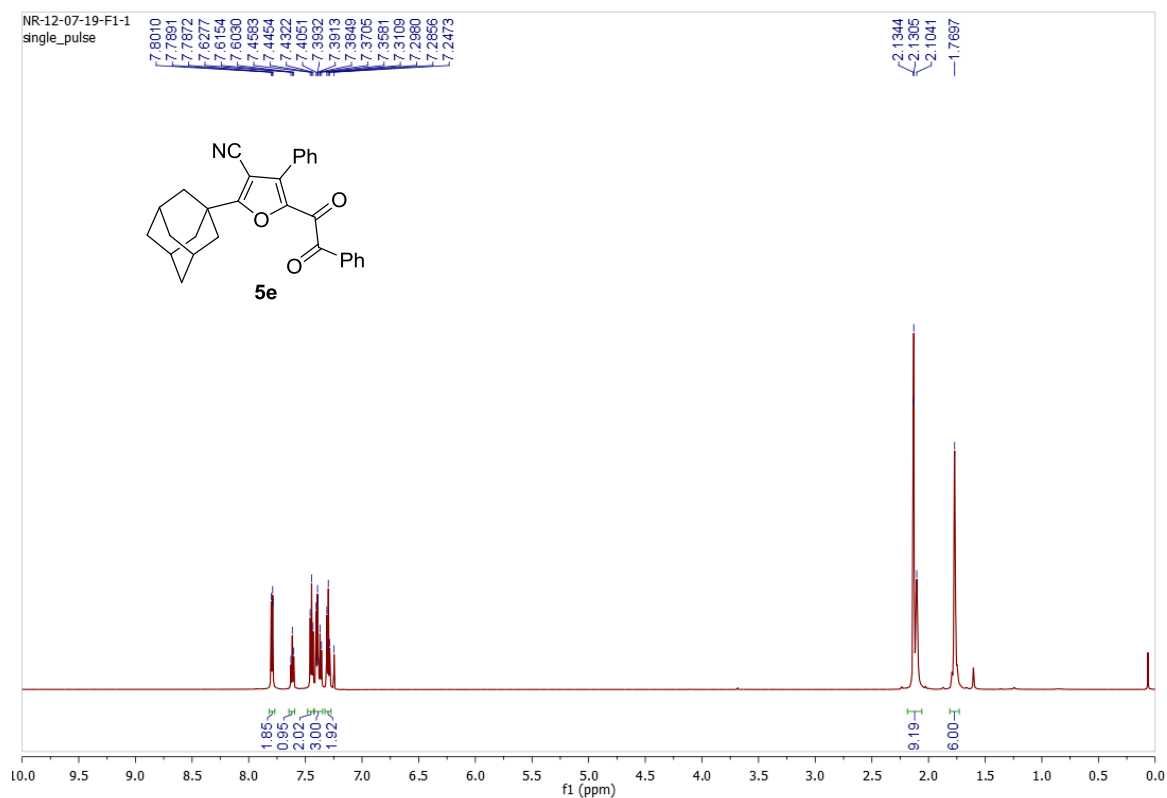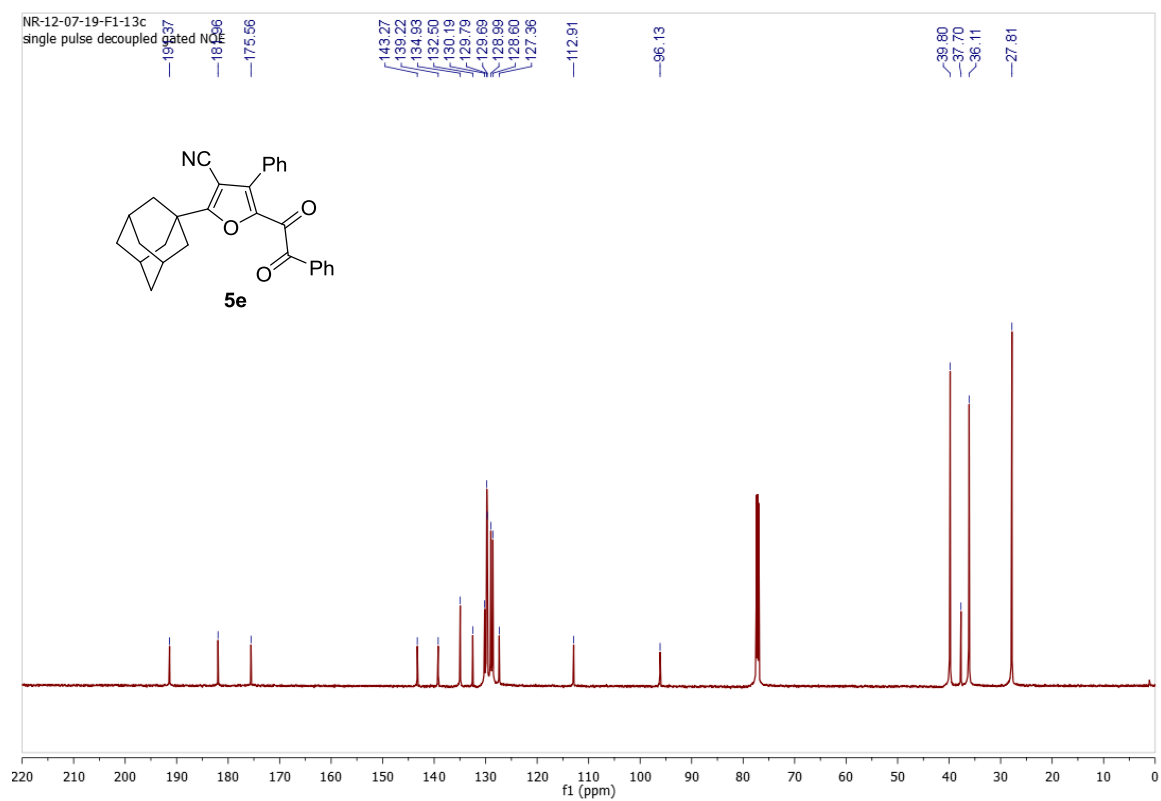

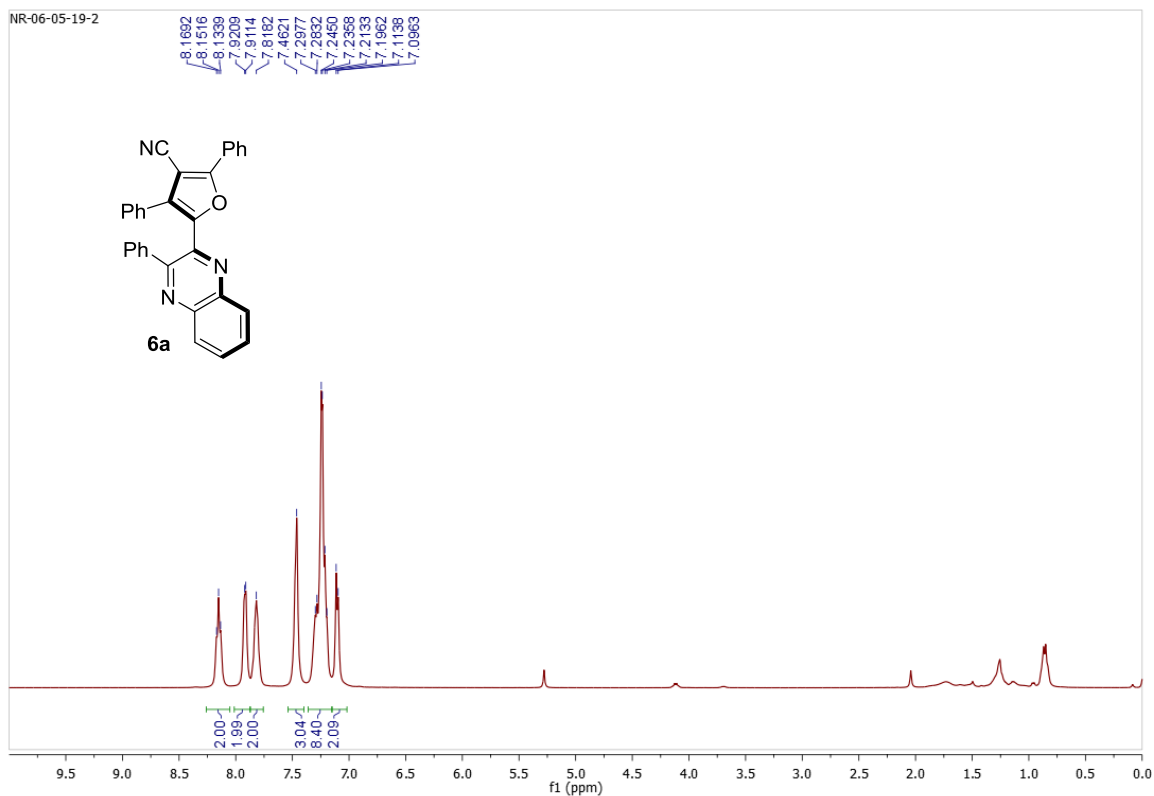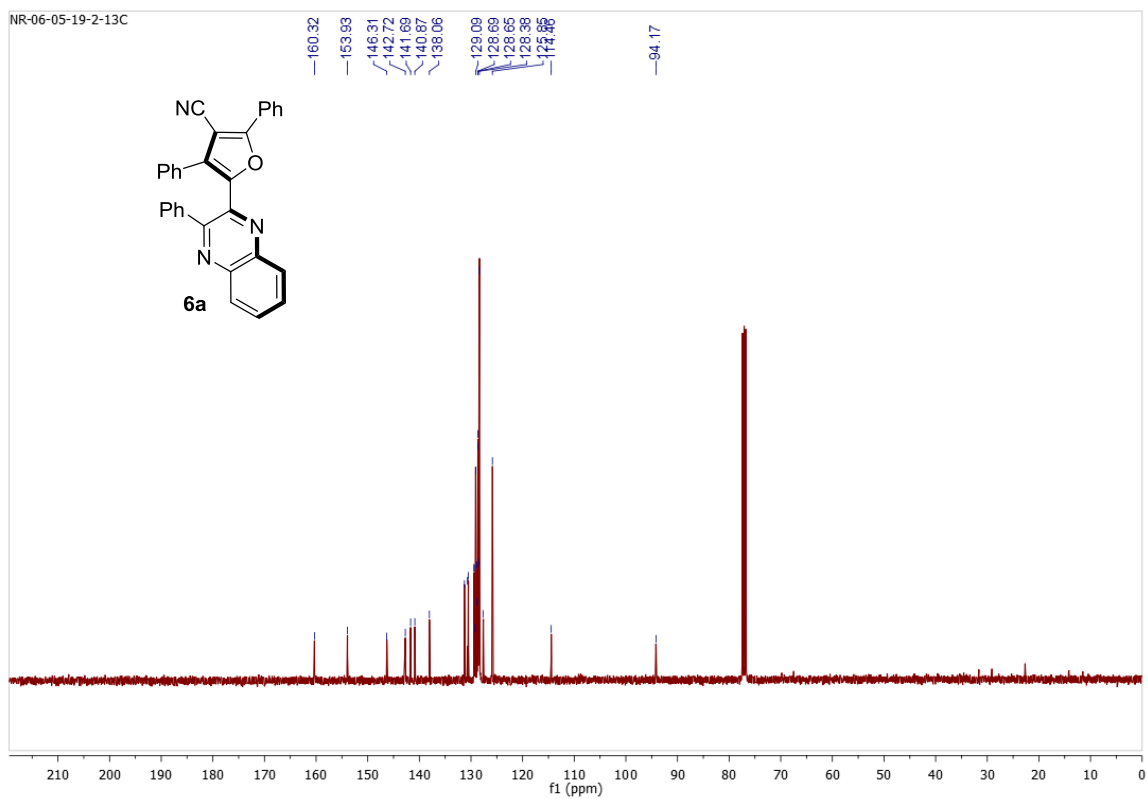

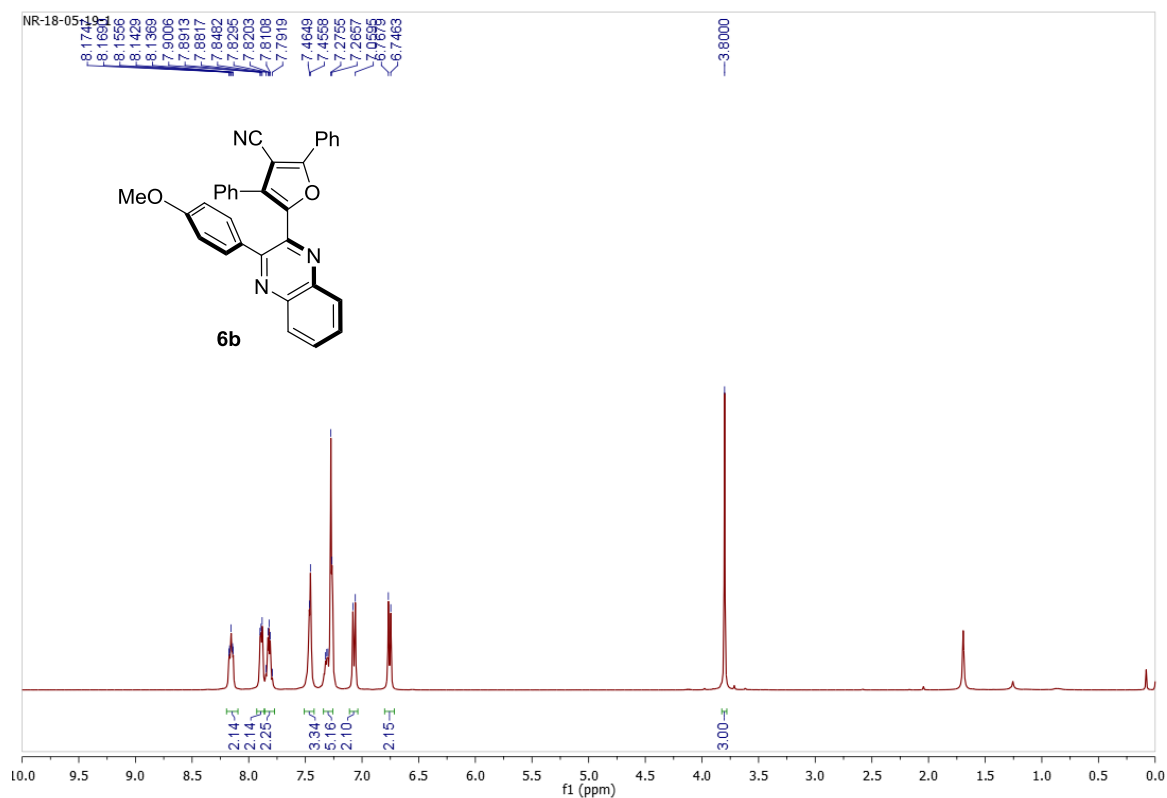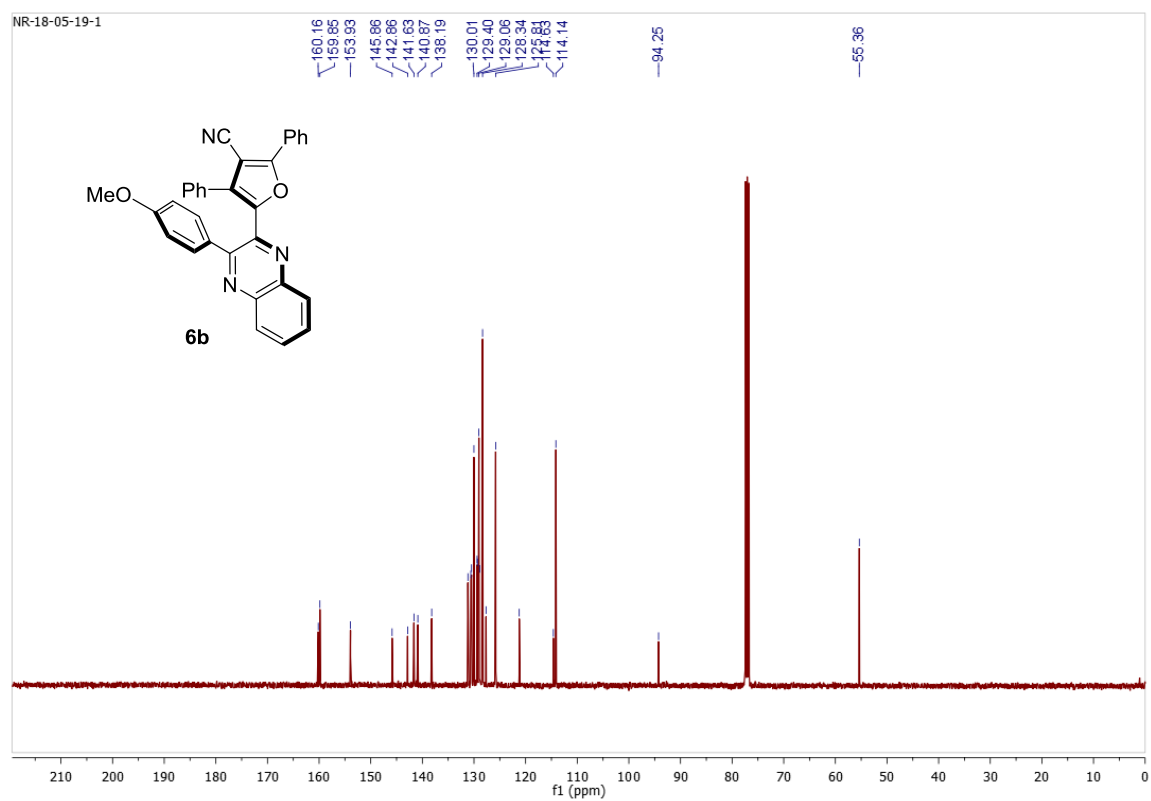

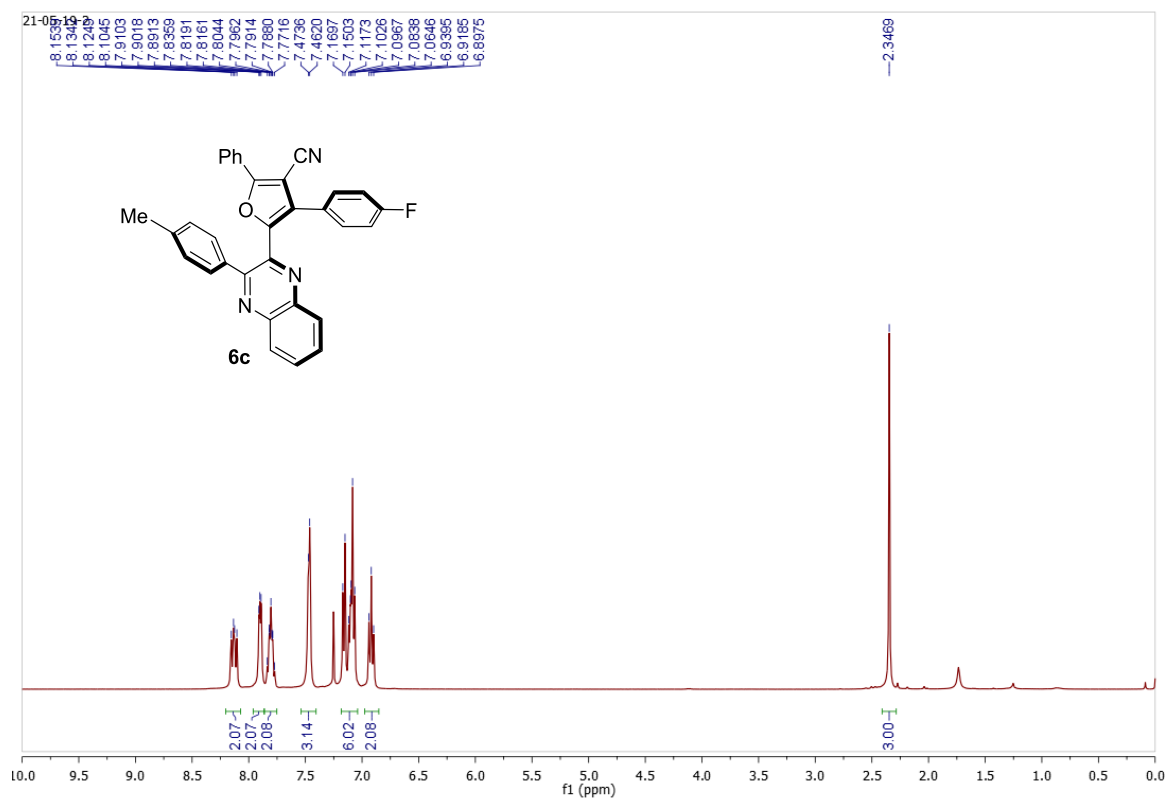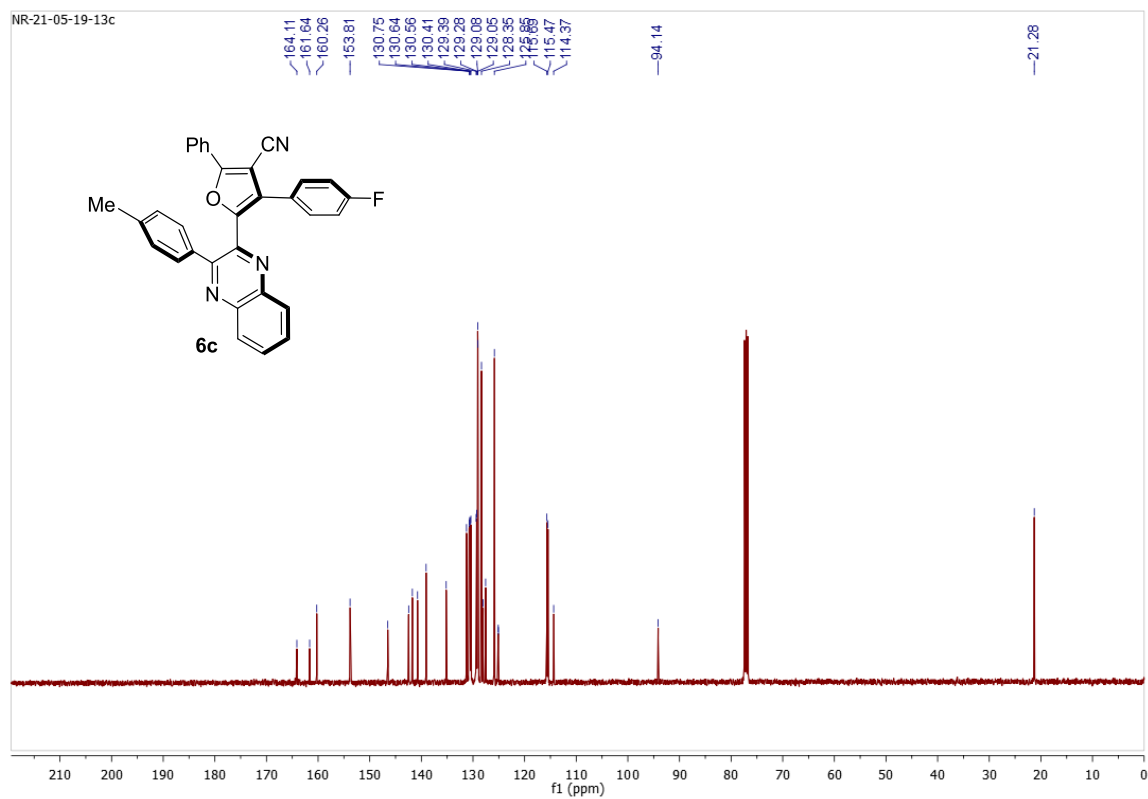



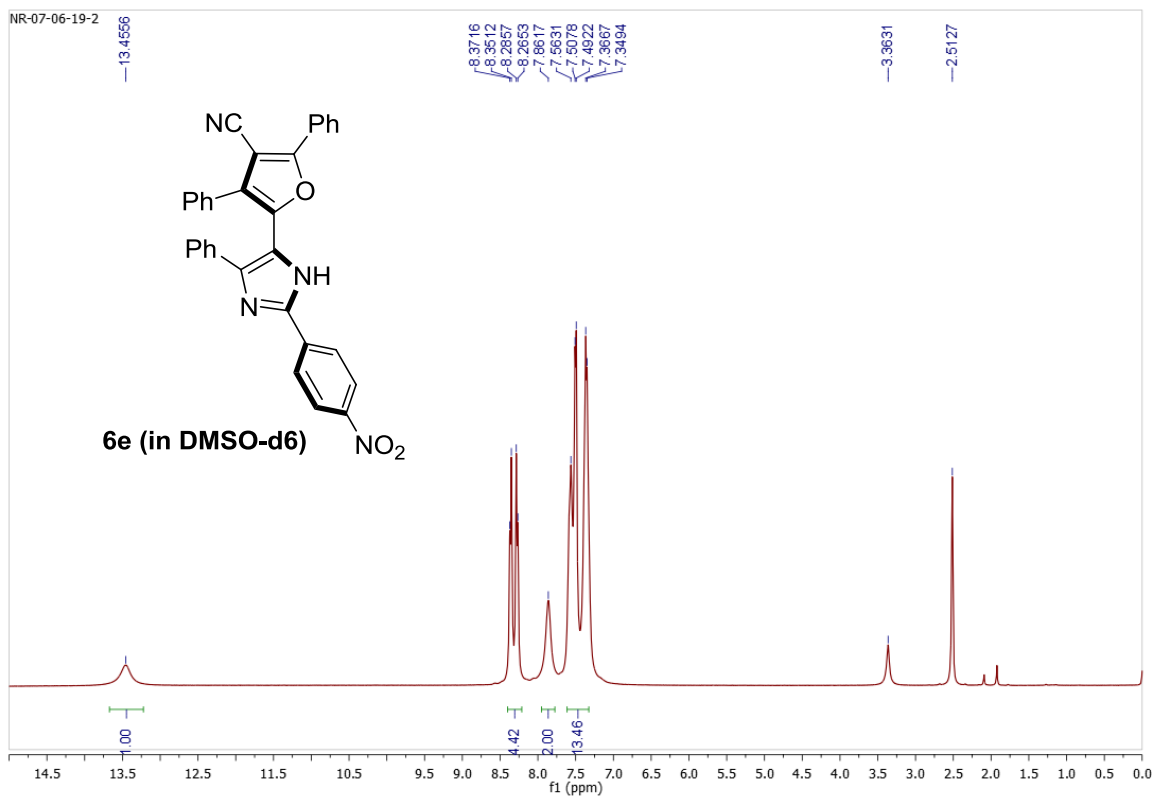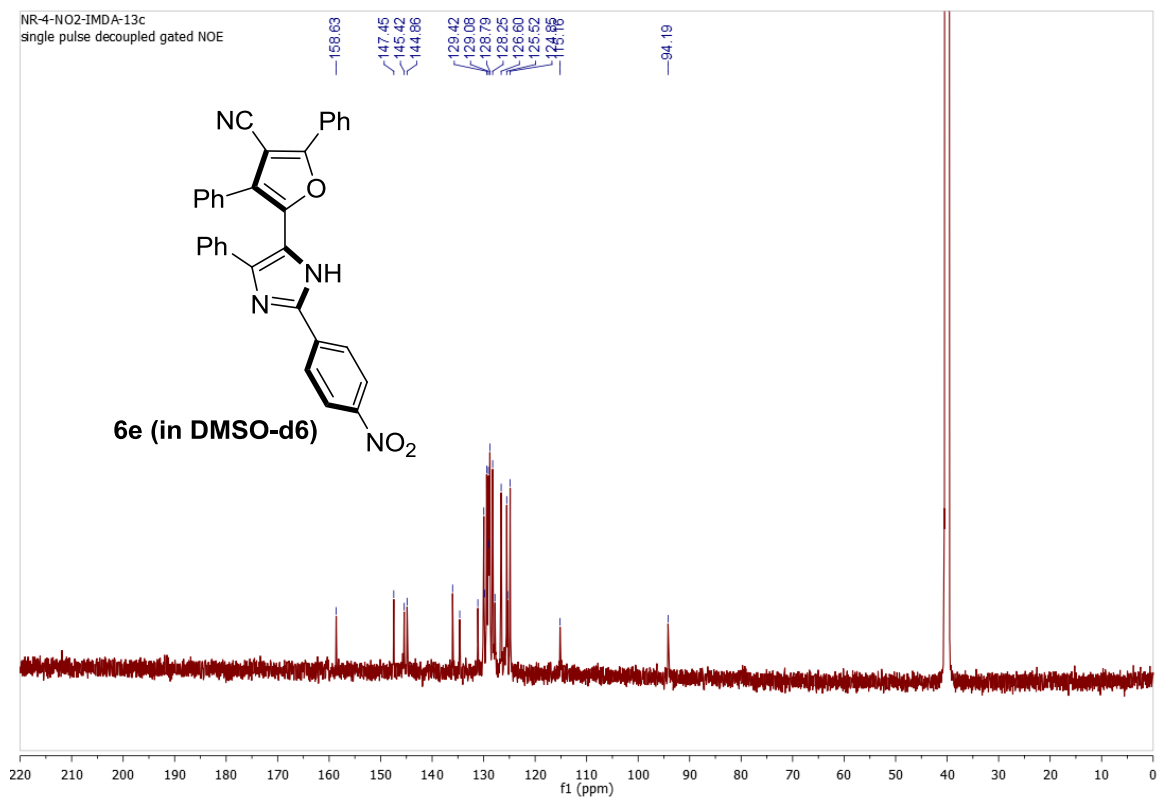

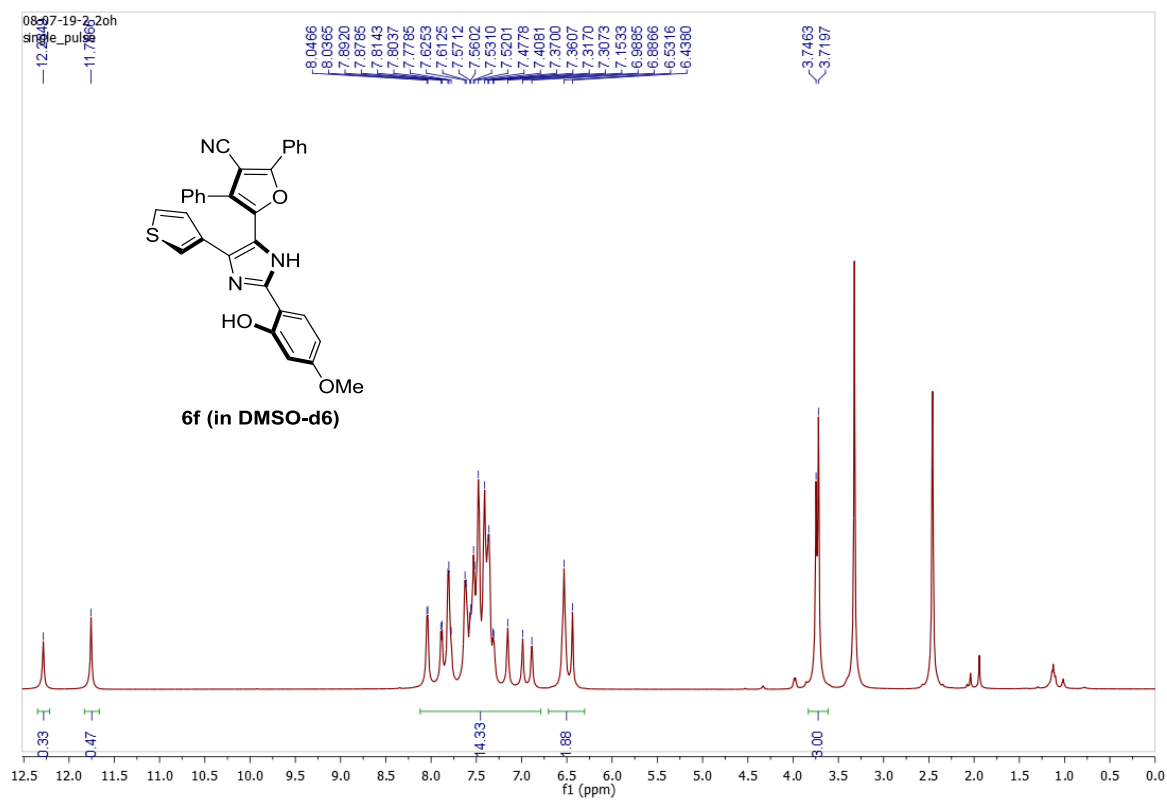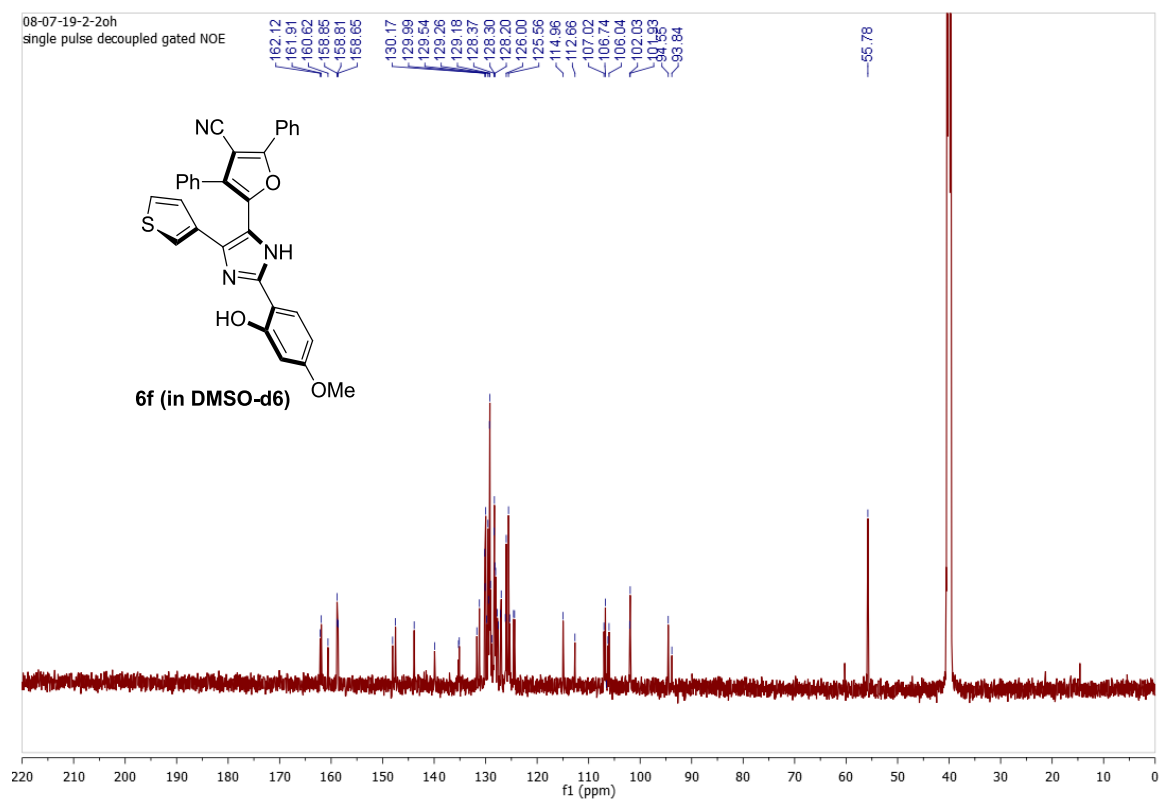

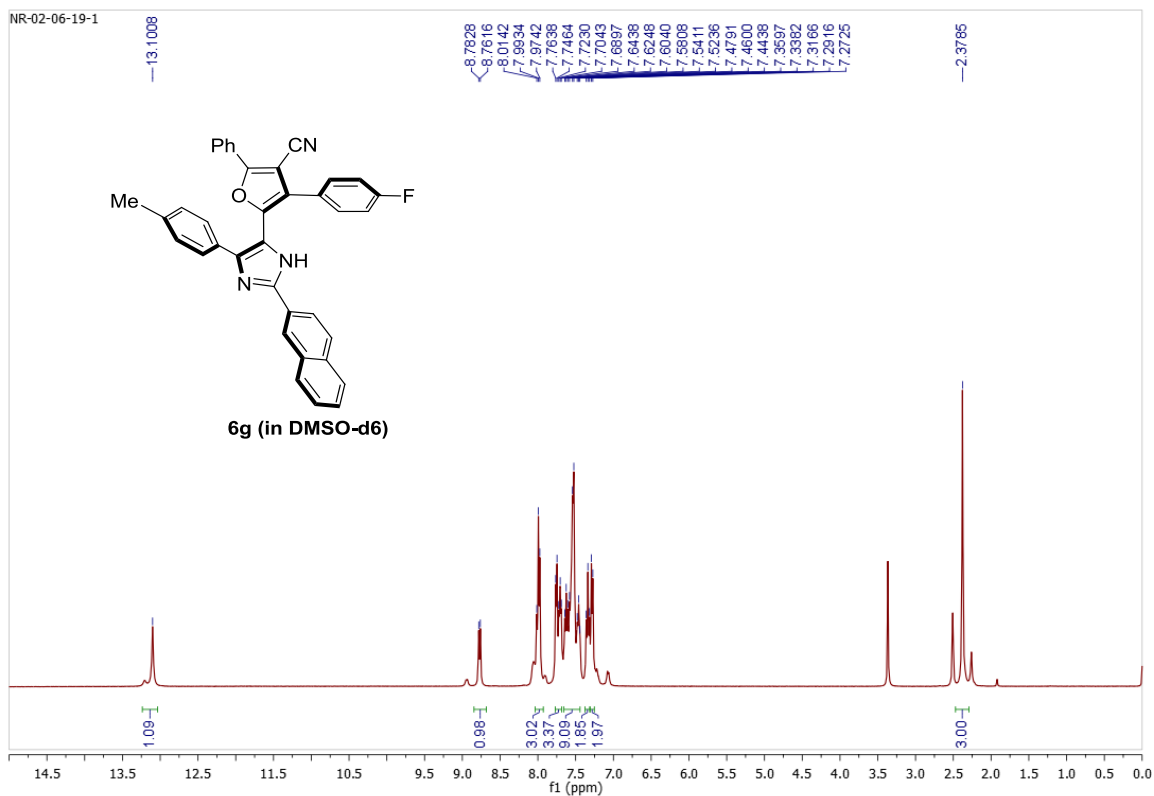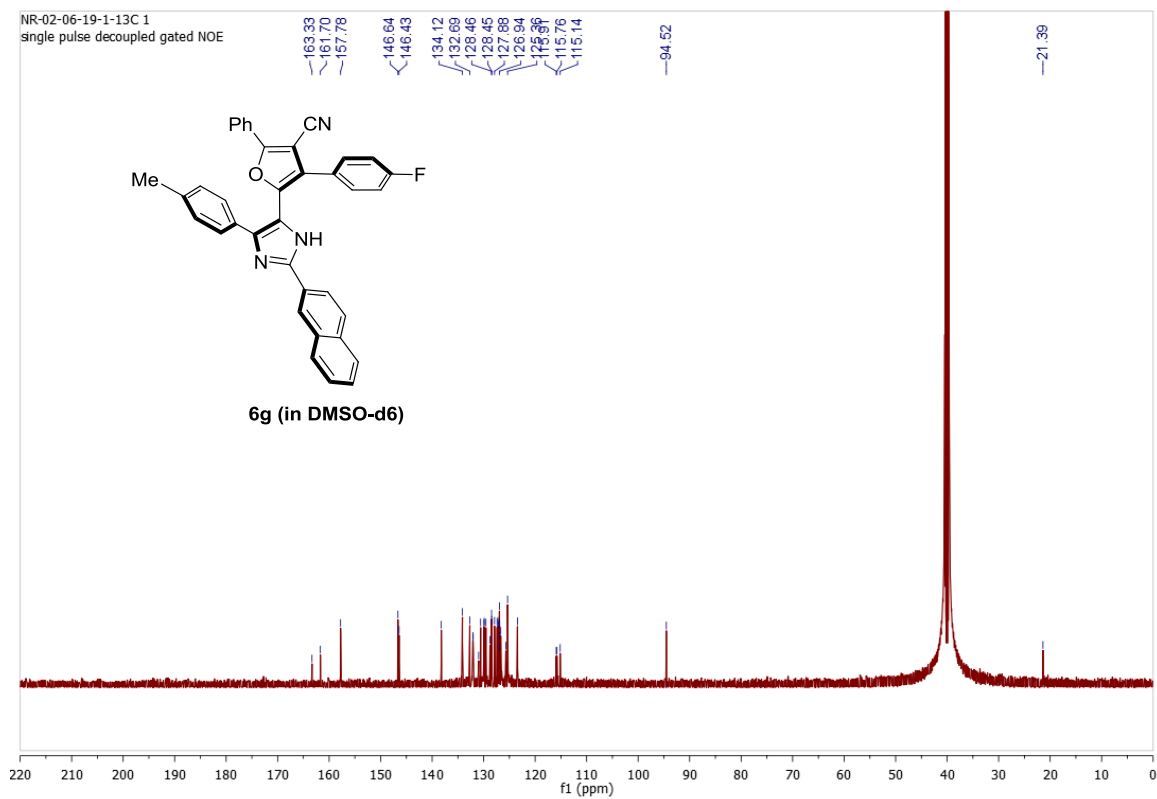



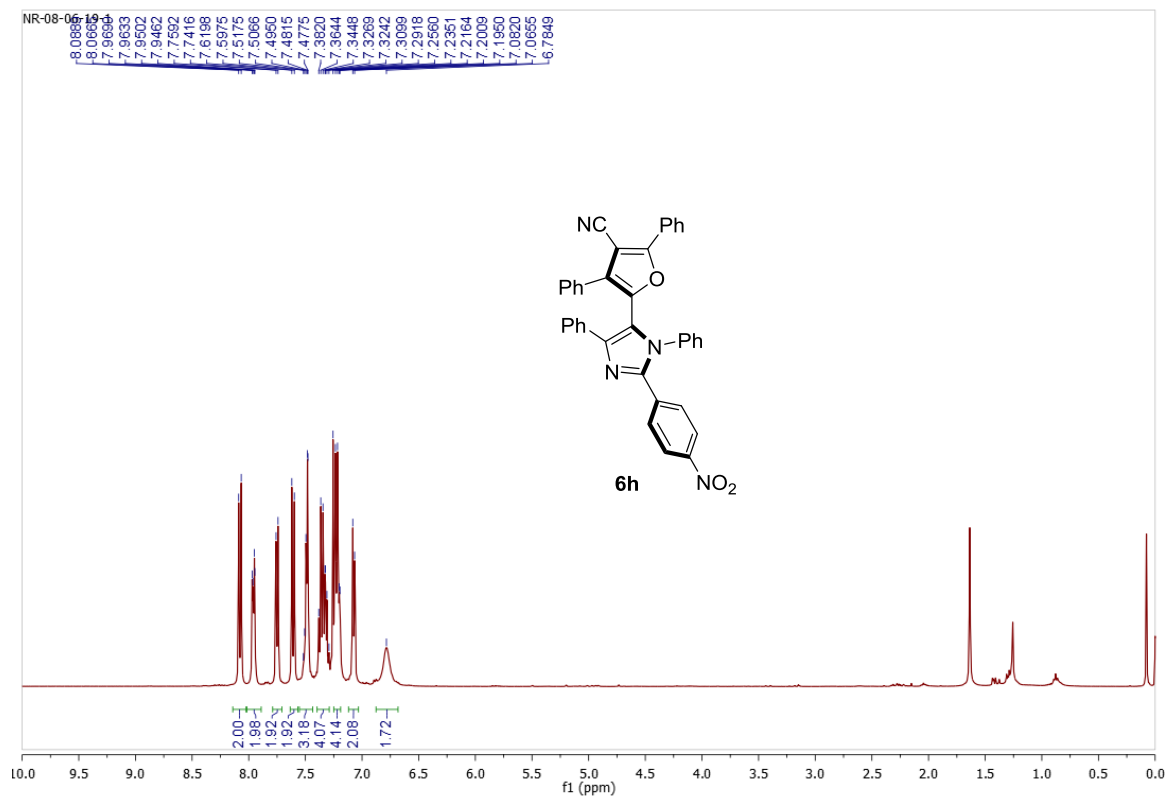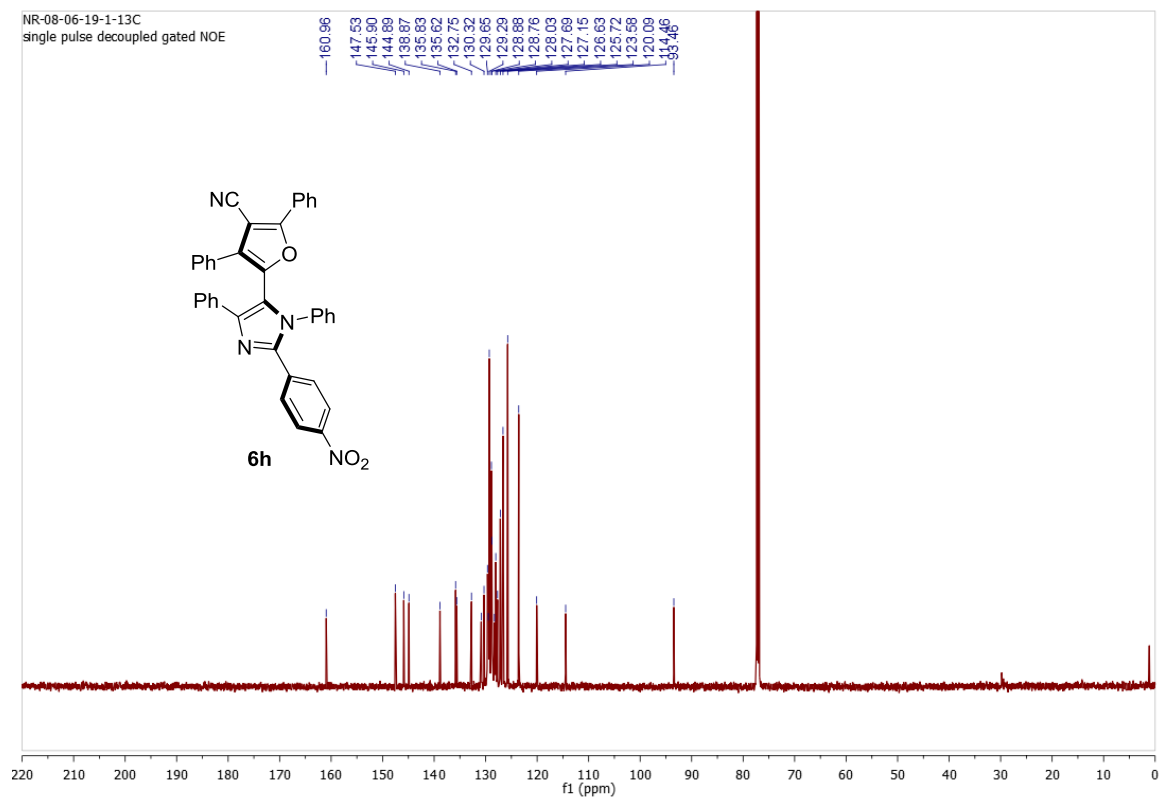

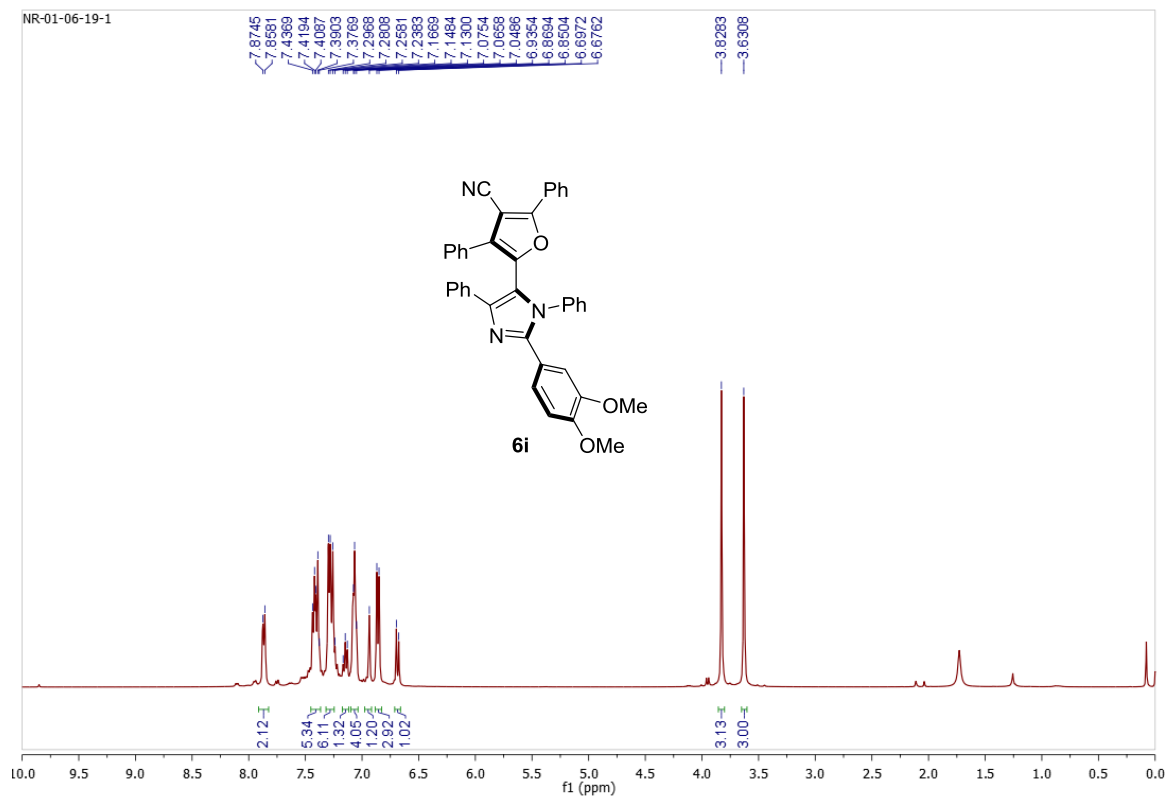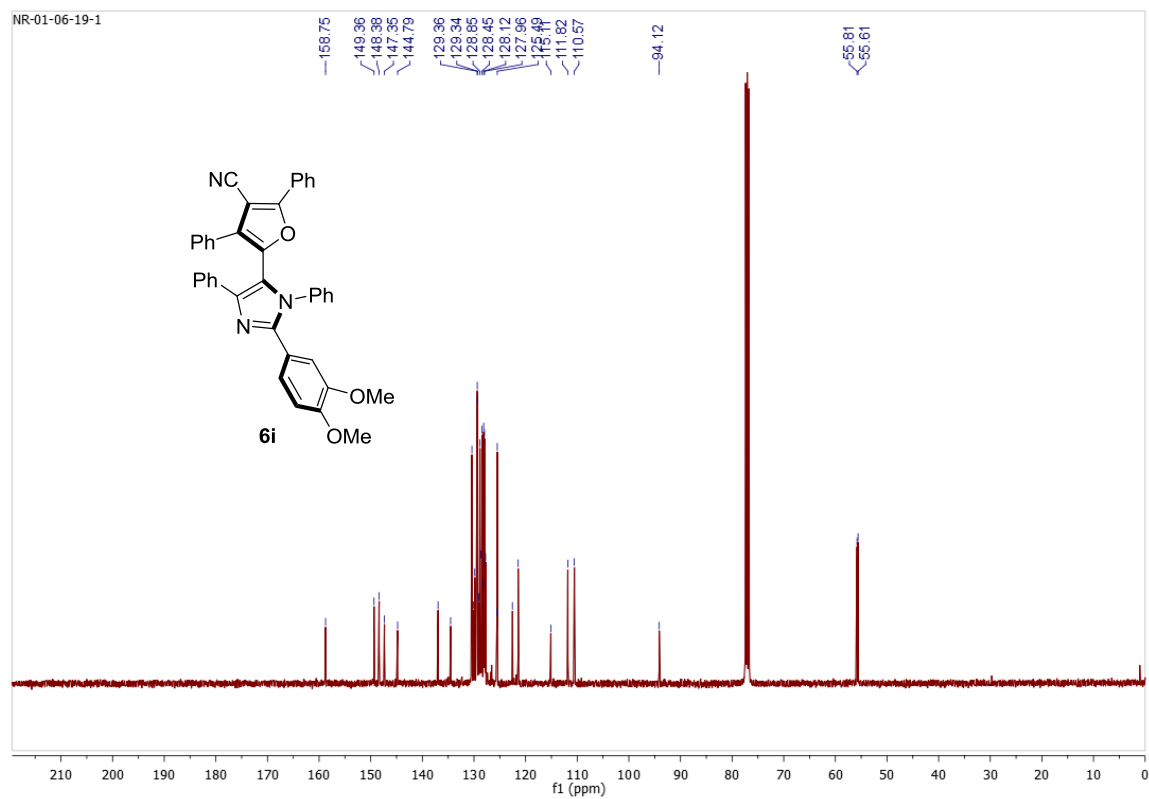

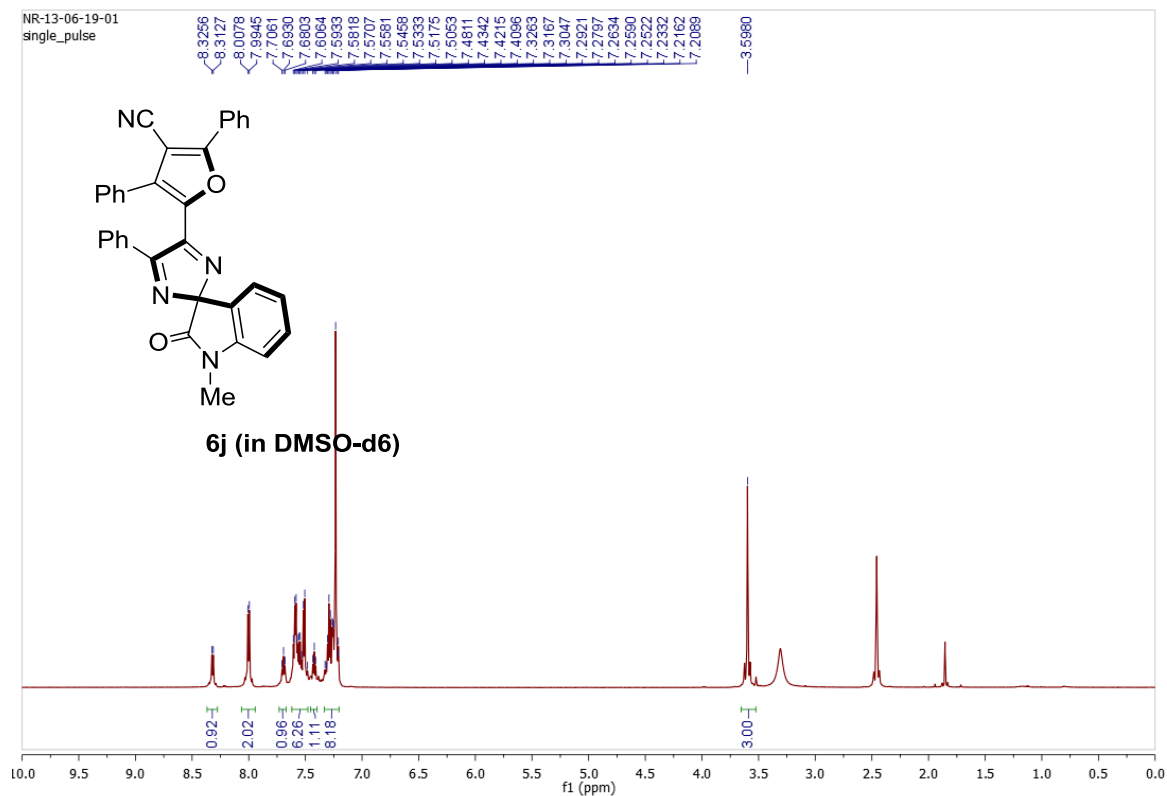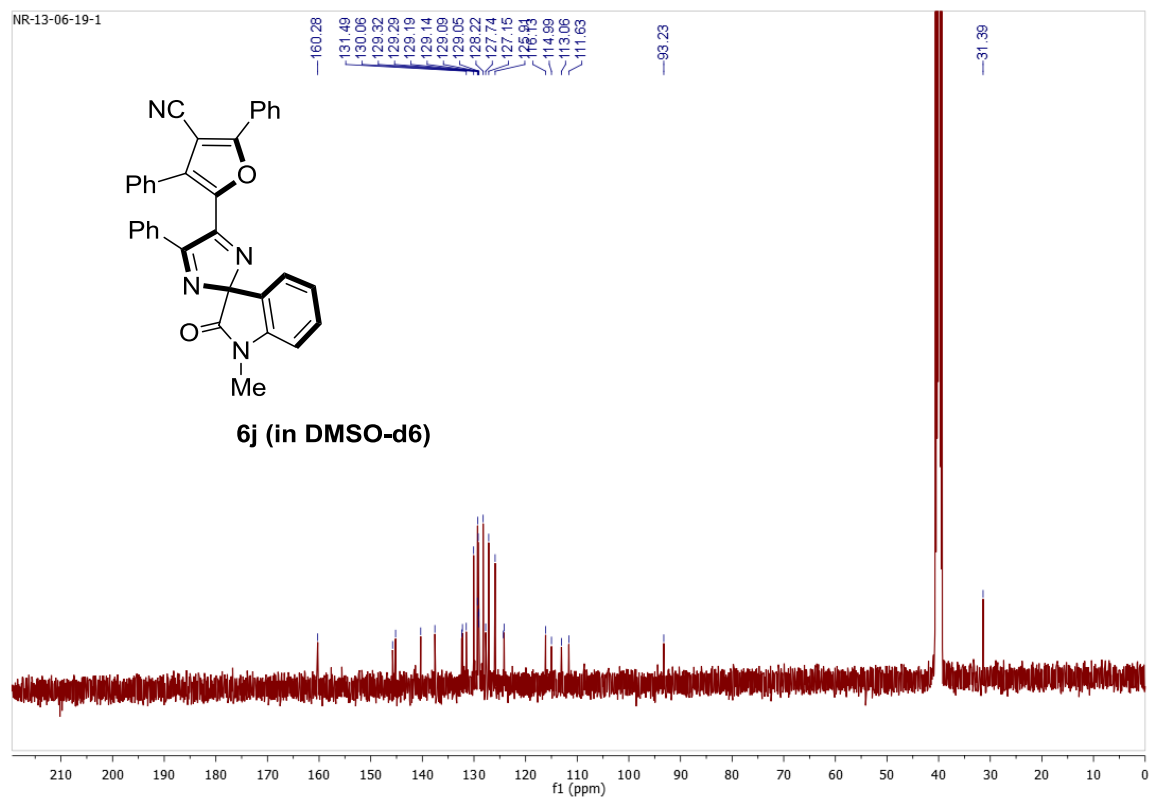

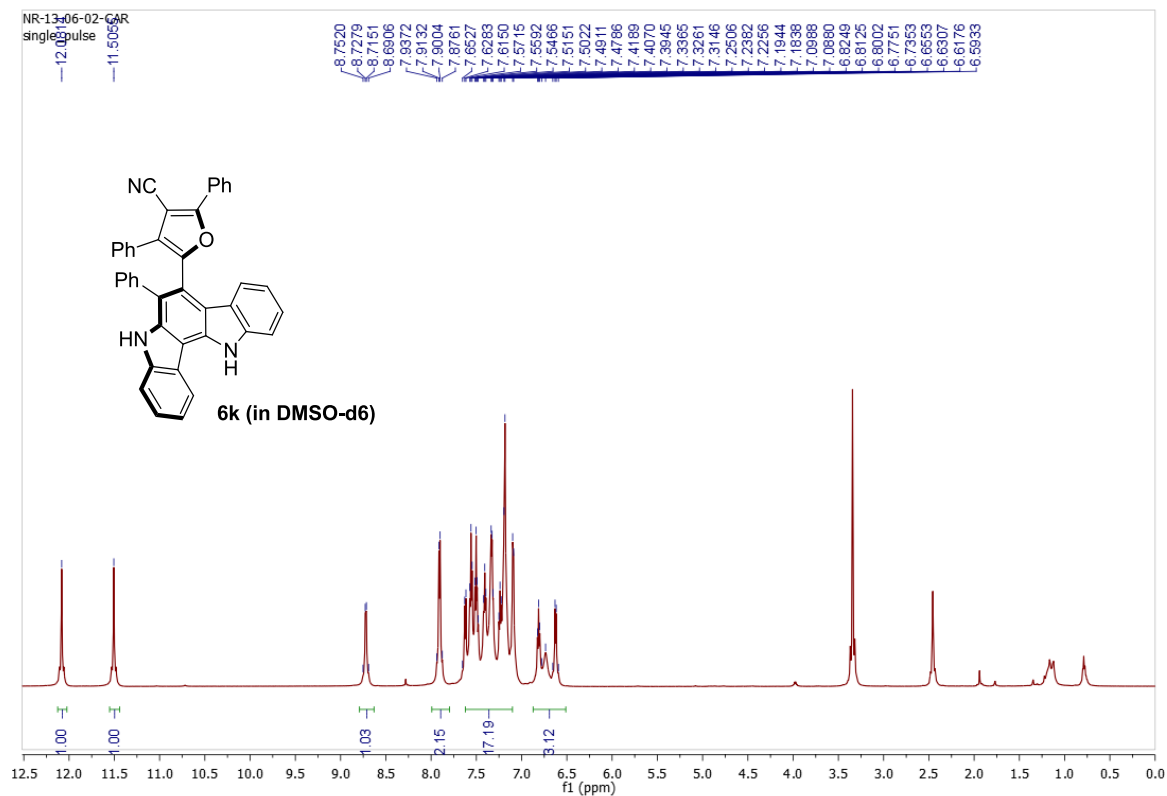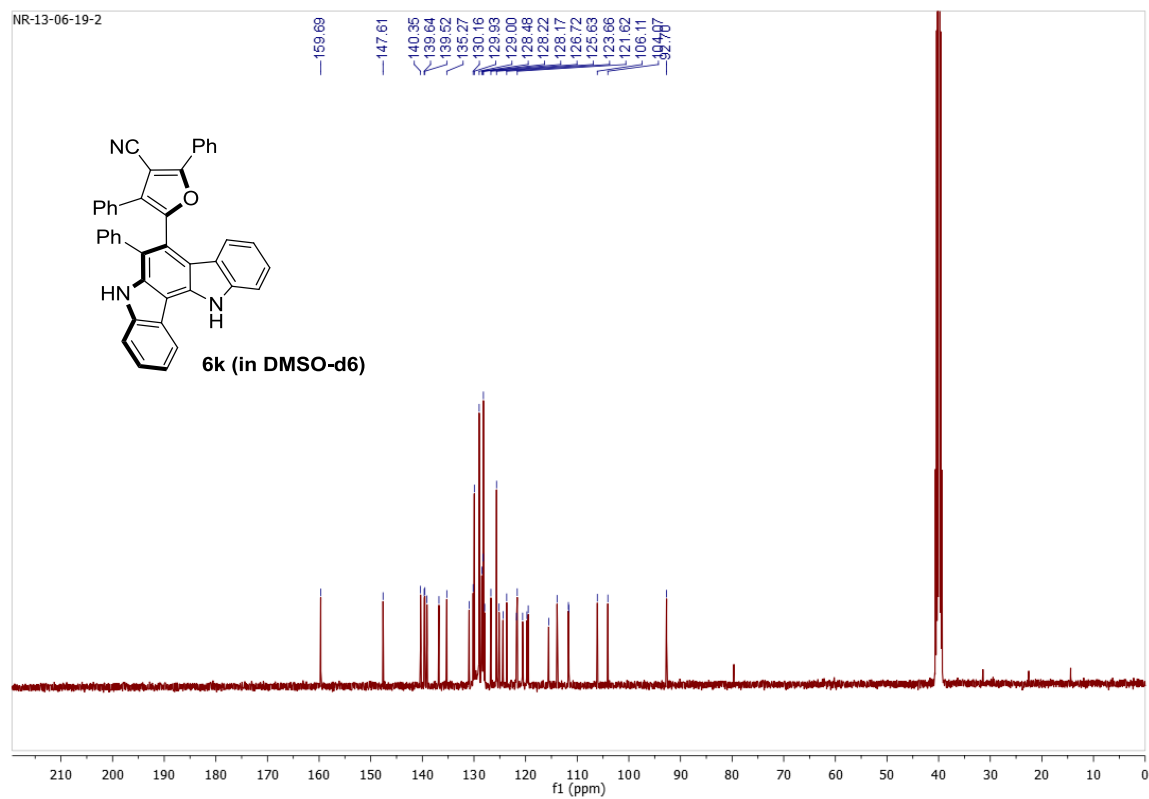

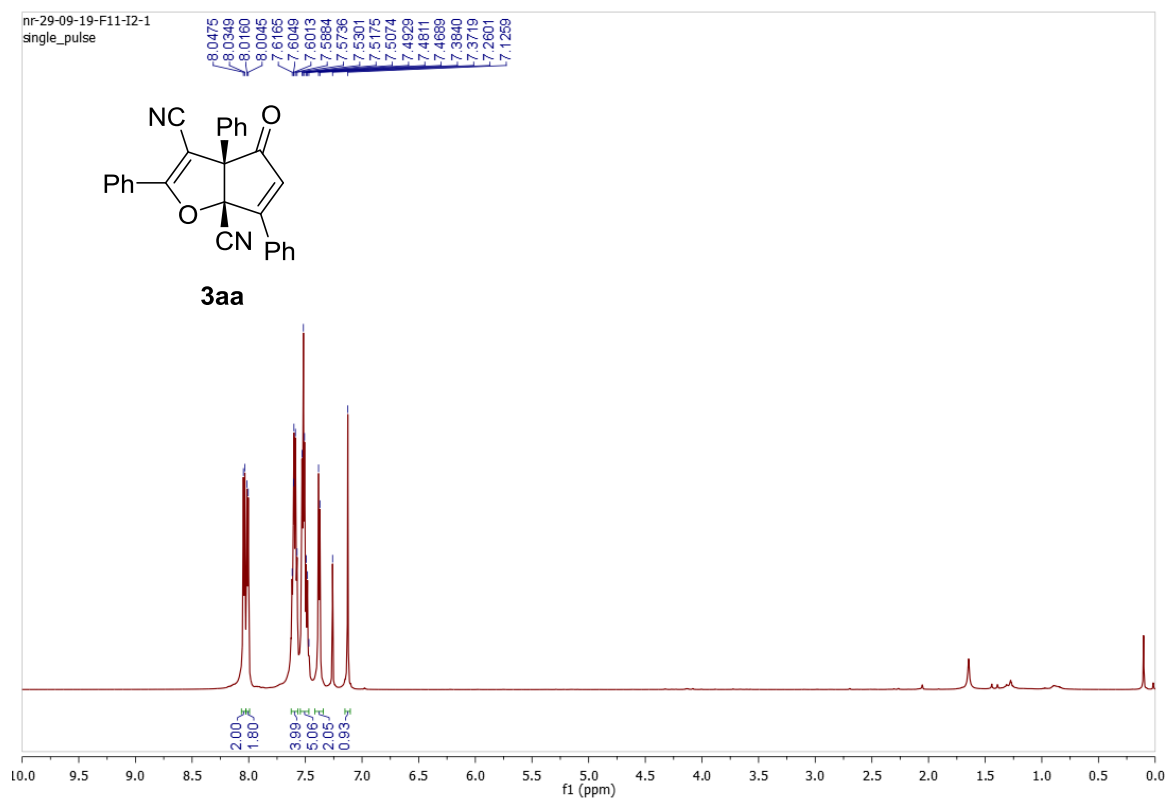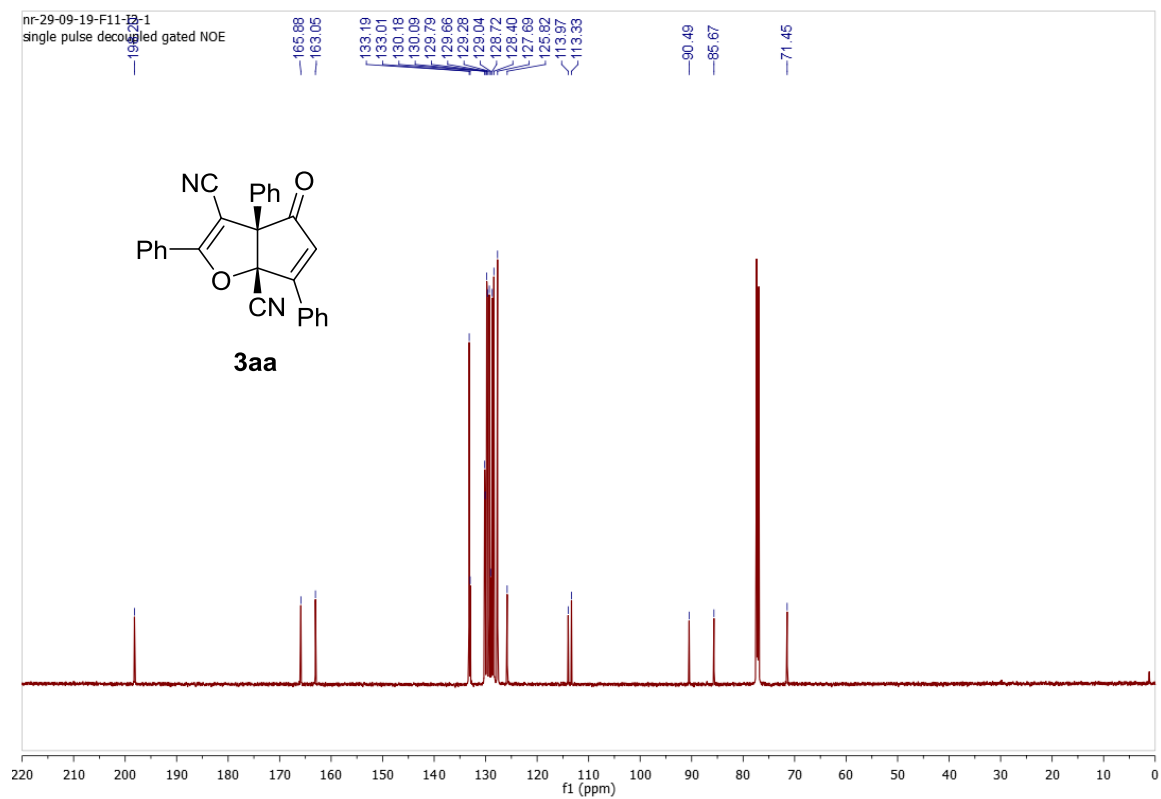



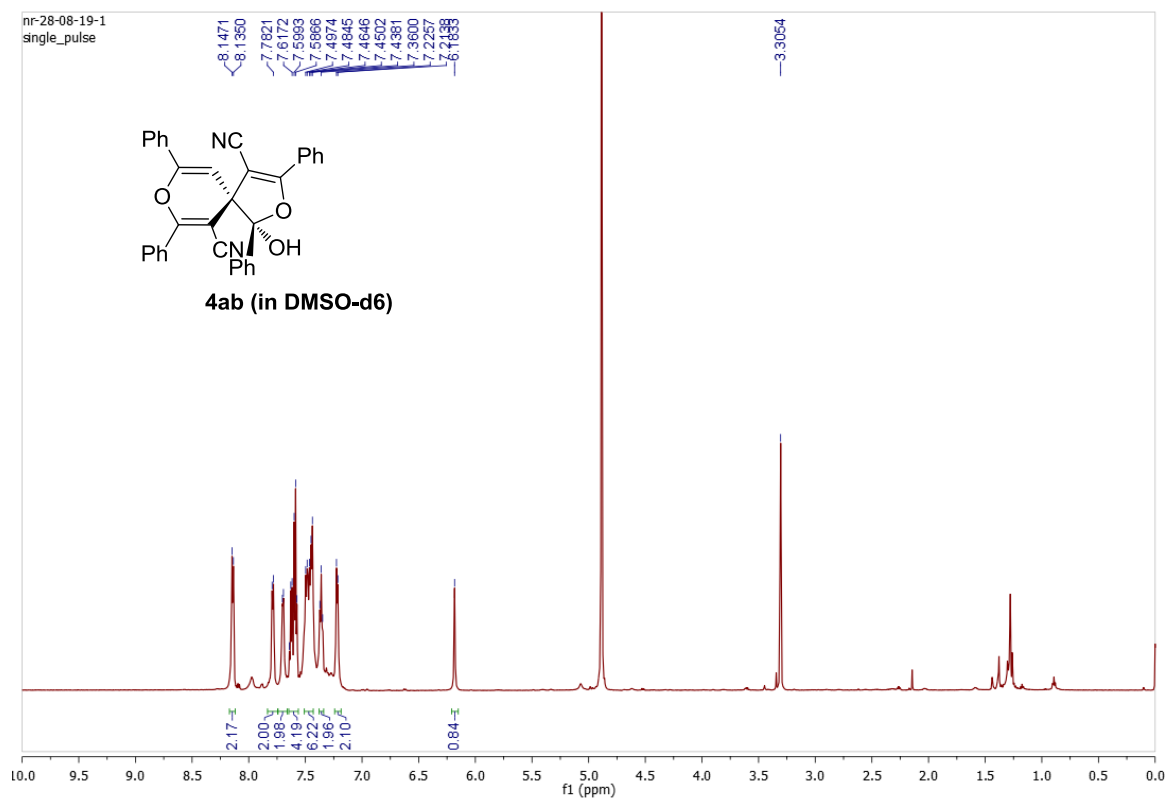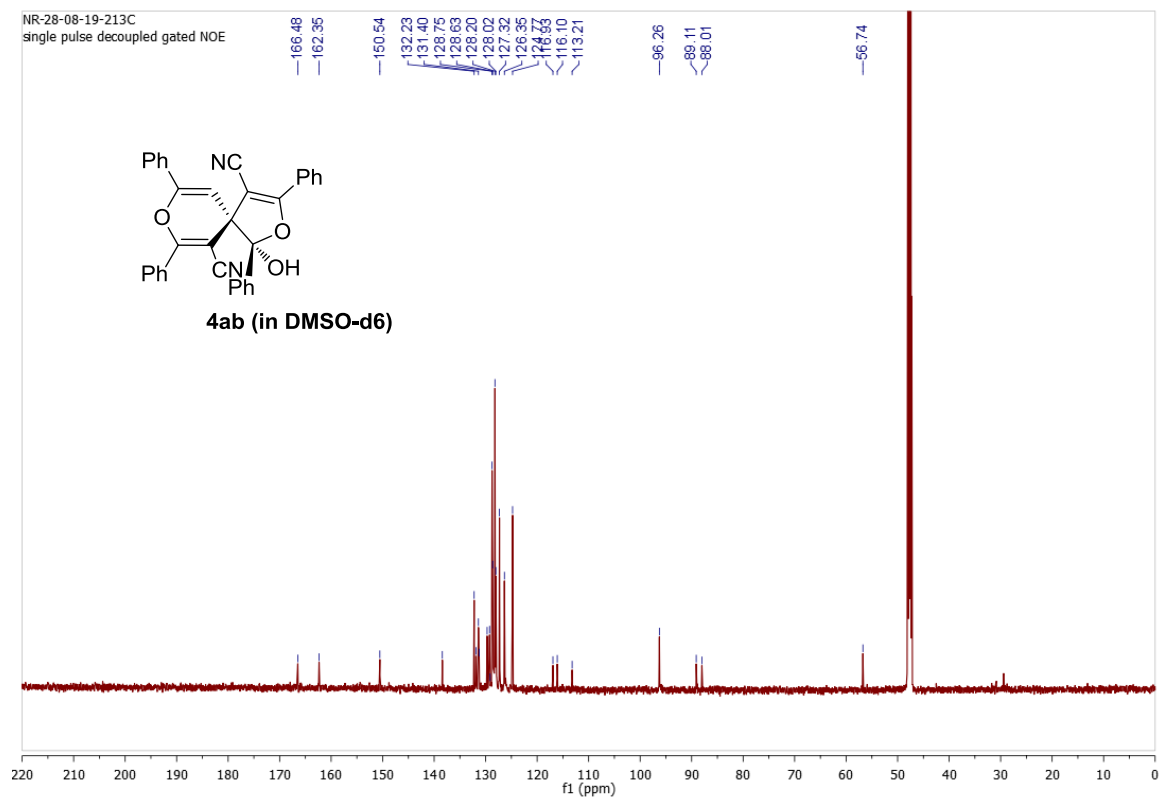

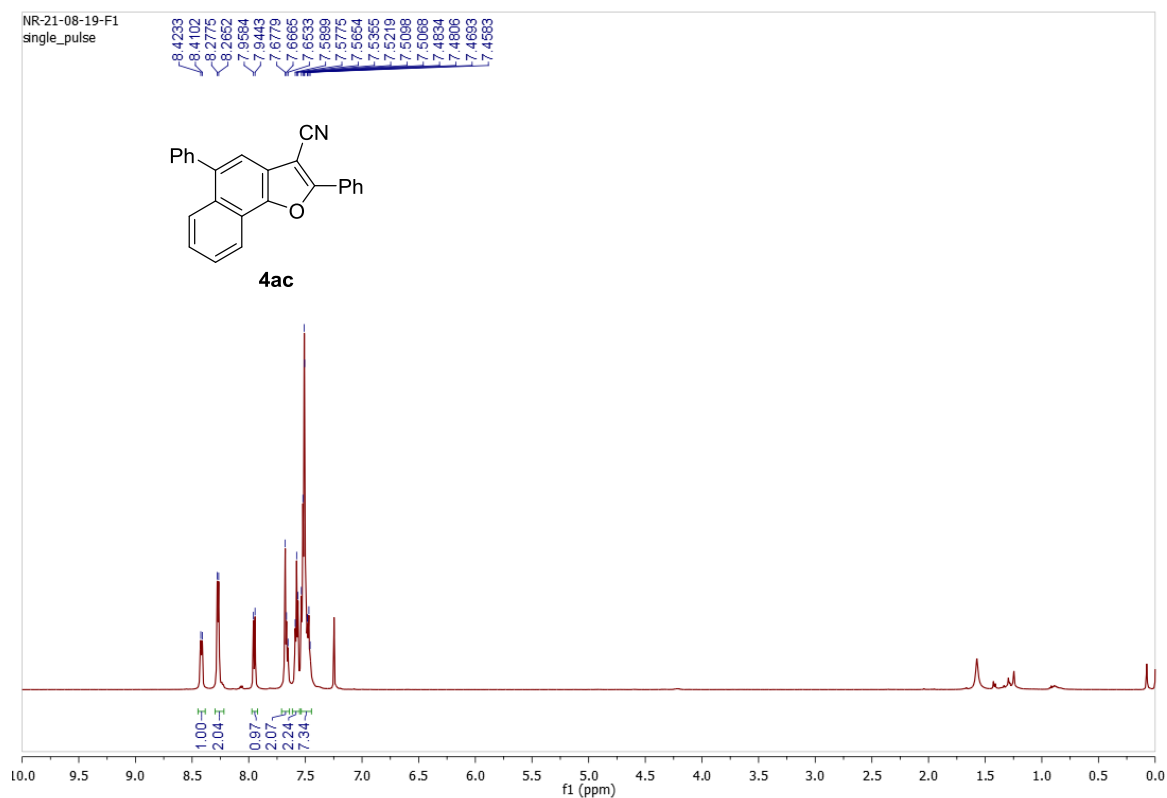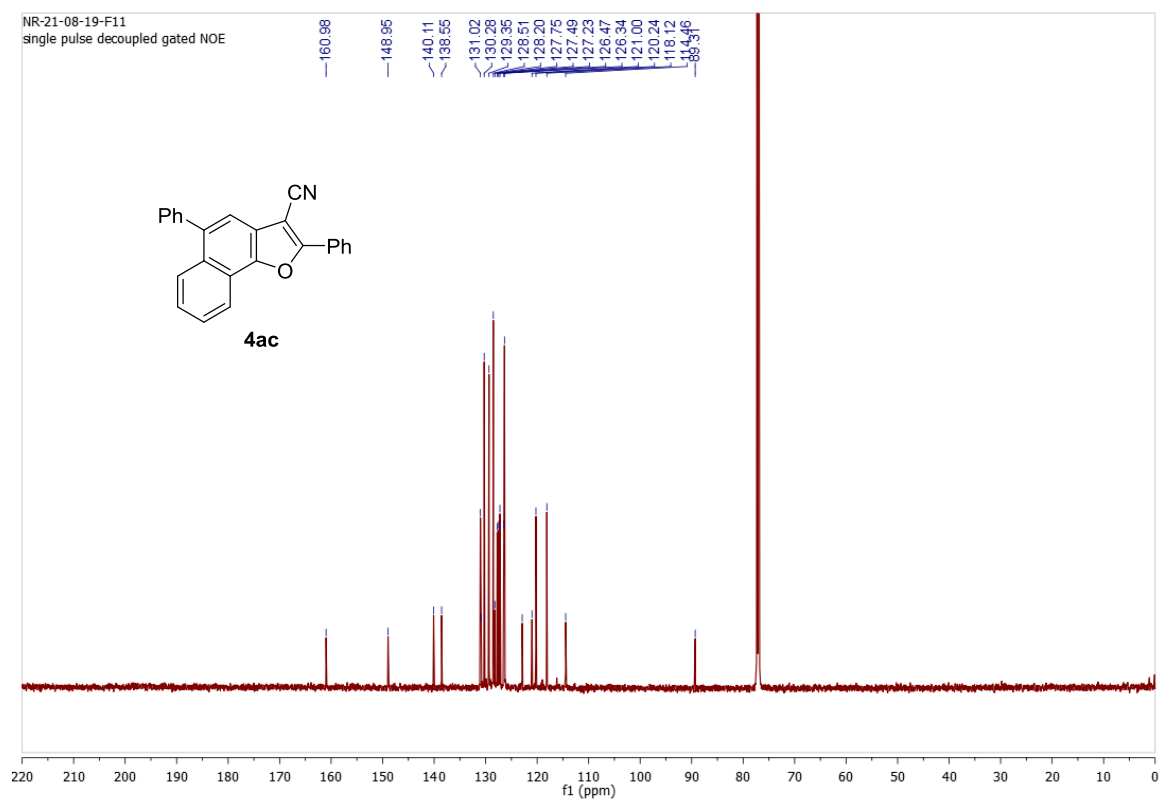



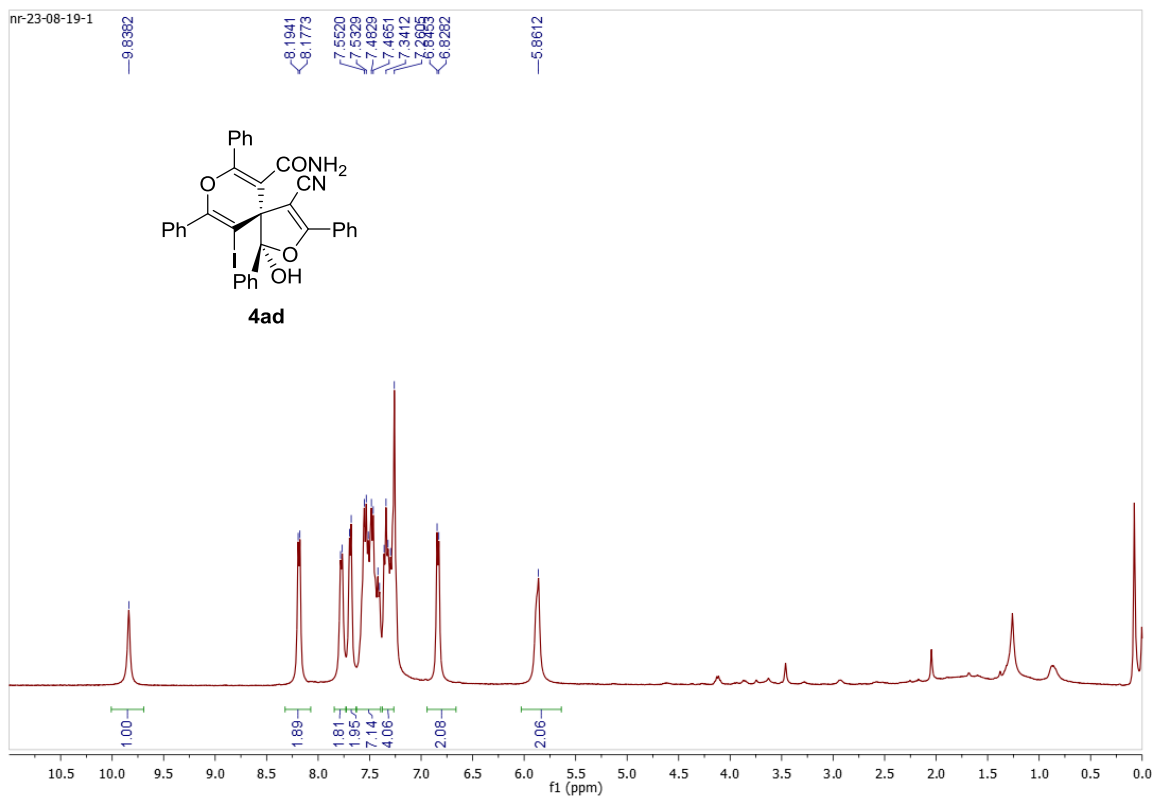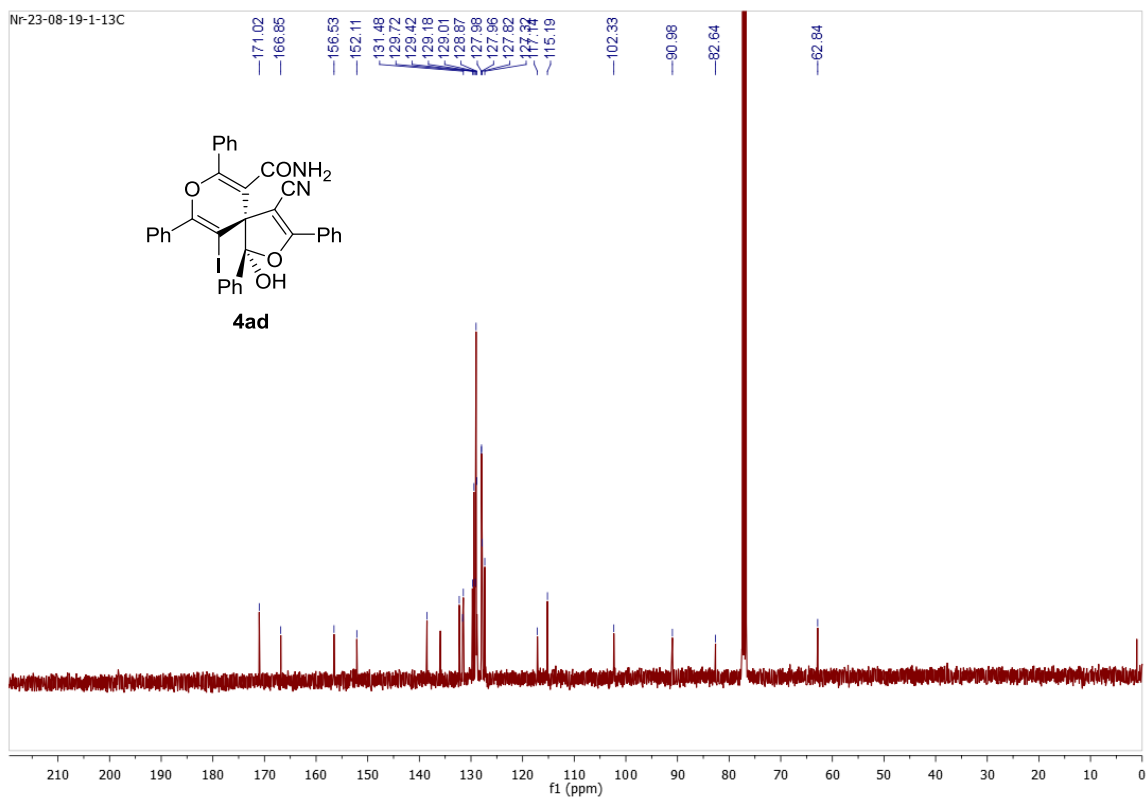

Supplement: Supplementary file 1 [file 20049485]
